# Supplementary material for: Structure-based discovery of potent and selective melatonin receptor agonists
Source: eLife journal article supplement (doi:10.7554/elife.53779), 2020-03-02

L693637\$2

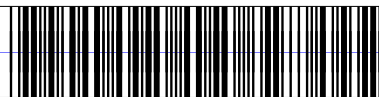

MaxPeak: 100.00%  
Ret\_Time: 0.774 min

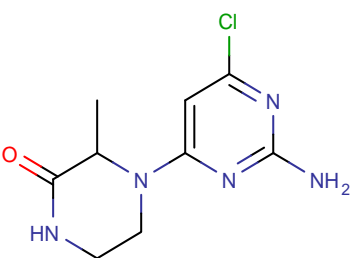

Mol Wt 241.68

Exact Mass 241.08

| # | Time  | Area%  |
|---|-------|--------|
| 1 | 0.774 | 100.00 |

DAD1 A, Sig=215,16 Ref=off (D:\DATA\MARCH\0503\L084544D\040-D5F-B5-L693637\$2.D)

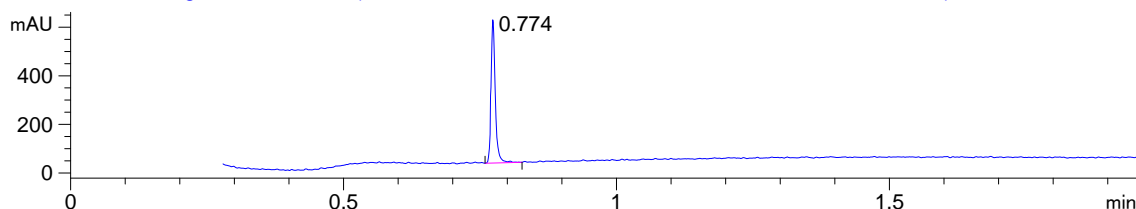

DAD1 B, Sig=254,16 Ref=off (D:\DATA\MARCH\0503\L084544D\040-D5F-B5-L693637\$2.D)

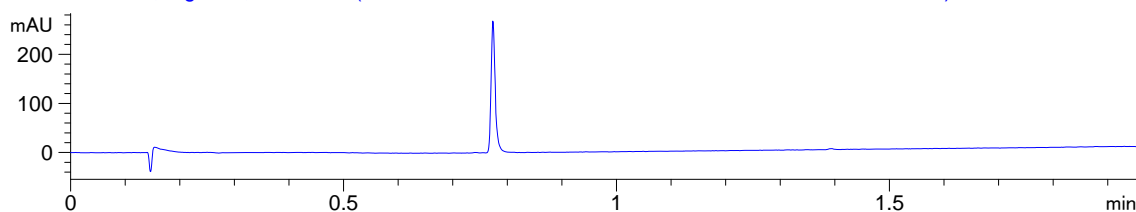

MSD1 TIC, MS File (D:\DATA\MARCH\0503\L084544D\040-D5F-B5-L693637\$2.D) ES-API, Scan, Frag: 100, "POS"

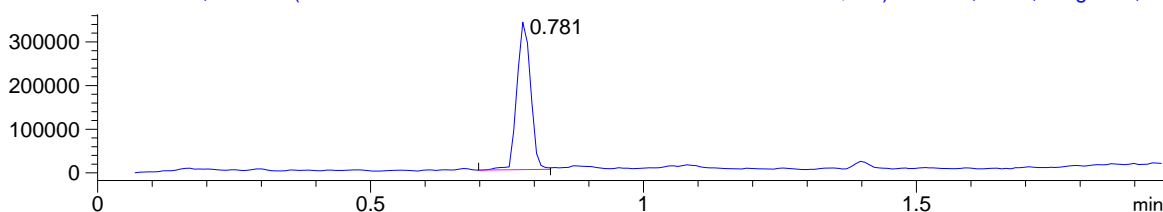

MSD2 TIC, MS File (D:\DATA\MARCH\0503\L084544D\040-D5F-B5-L693637\$2.D) ES-API, Scan, Frag: 100, "POS"

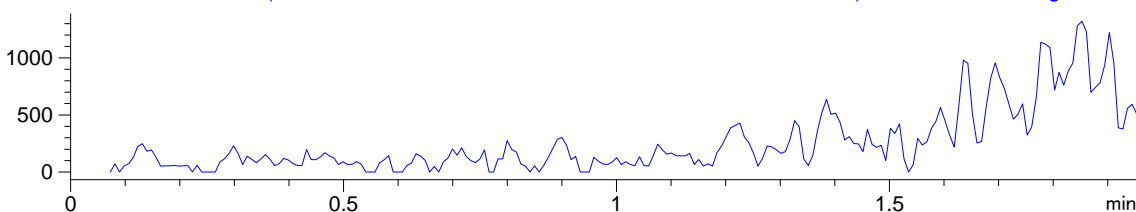

ADC1 A, ELSD (D:\DATA\MARCH\0503\L084544D\040-D5F-B5-L693637\$2.D)

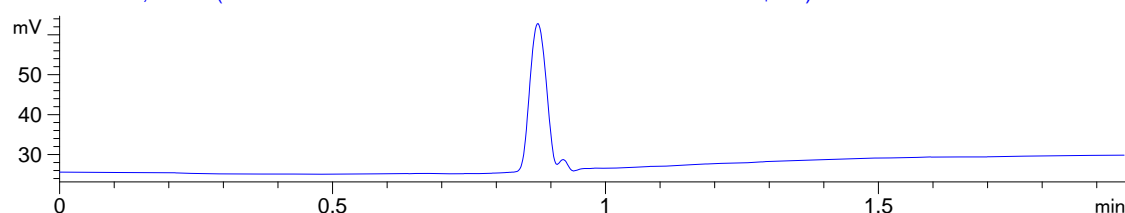

\*MSD1 SPC, time=0.779 of D:\DATA\MARCH\0503\L084544D\040-D5F-B5-L693637\$2.D ES-API, Scan, Frag: 100, "POS"

RT 0.781

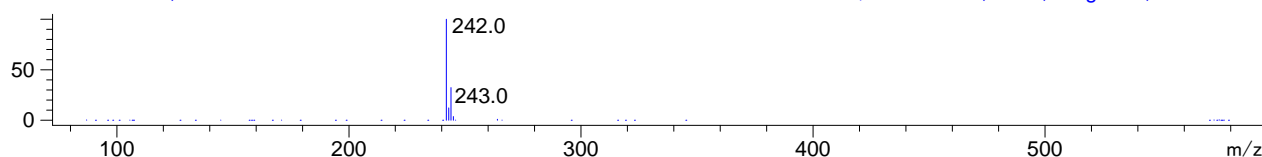

Supplement: supp2 [file elife-53779-supp2-v2.zip]
