# Supplementary material for: Structure-based discovery of potent and selective melatonin receptor agonists
Source: eLife journal article supplement (doi:10.7554/elife.53779), 2020-03-02

MaxPeak: 100.00%  
Ret\_Time: 0.987 min

L693648\$2

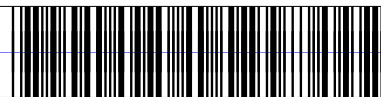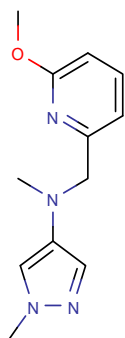

Mol Wt 232.28  
Exact Mass 232.15

| # | Time  | Area%  |
|---|-------|--------|
| 1 | 0.987 | 100.00 |

DAD1 A, Sig=215,16 Ref=off (D:\DATE\0306\L084754D\SAMPL000012.D)

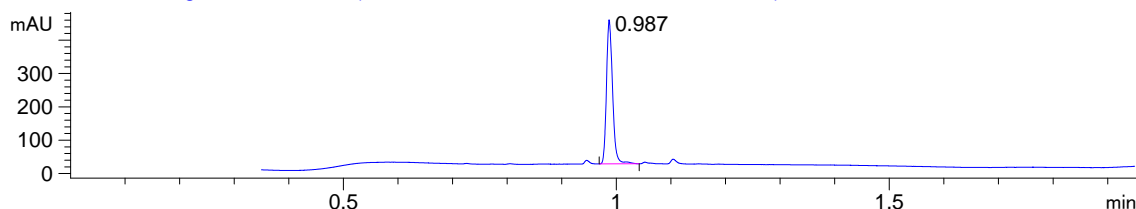

DAD1 B, Sig=254,16 Ref=off (D:\DATE\0306\L084754D\SAMPL000012.D)

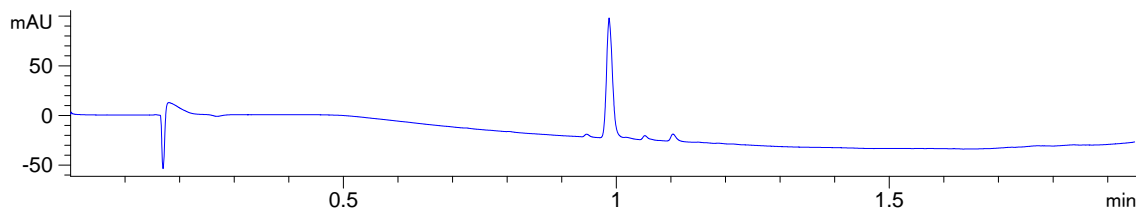

MSD1 TIC, MS File (D:\DATE\0306\L084754D\SAMPL000012.D) ES-API, Scan, Frag: 100, "POS"

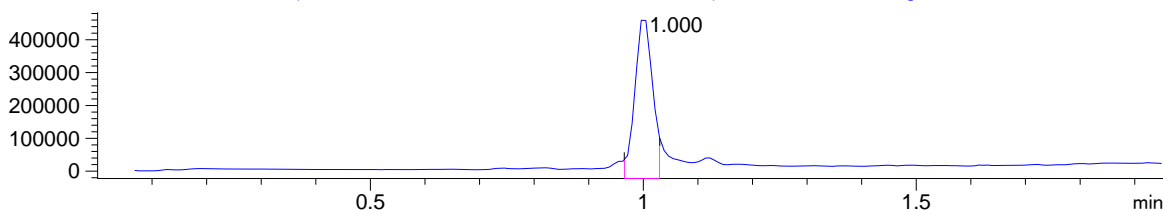

MSD2 TIC, MS File (D:\DATE\0306\L084754D\SAMPL000012.D) ES-API, Scan, Frag: 100, "NEG"

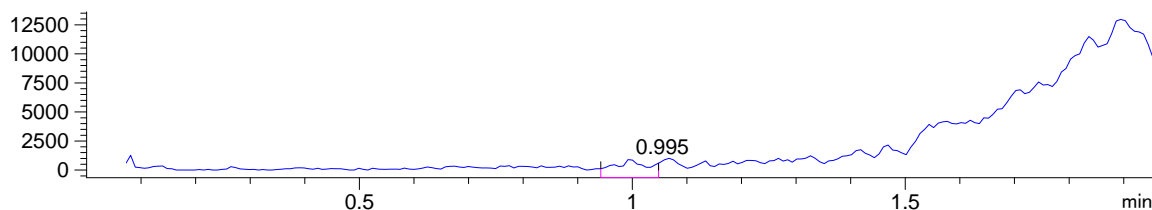

ADC1 A, ELSD (D:\DATE\0306\L084754D\SAMPL000012.D)

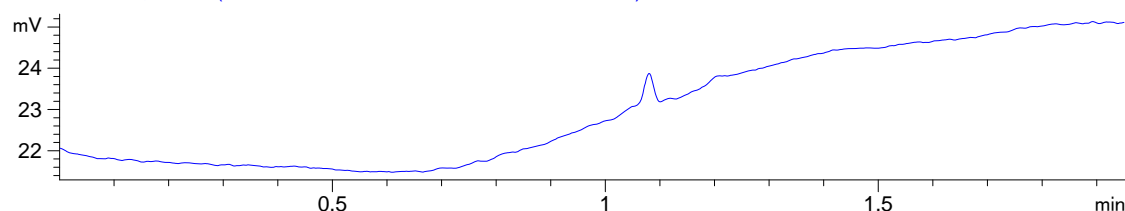

RT 1.000

\*MSD1 SPC, time=0.996 of D:\DATE\0306\L084754D\SAMPL000012.D ES-API, Scan, Frag: 100, "POS"

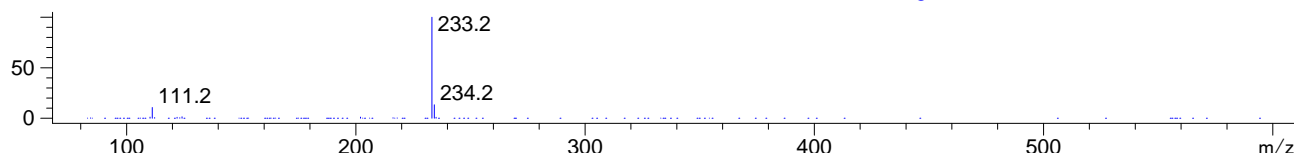

RT 0.995

\*MSD2 SPC, time=0.992 of D:\DATE\0306\L084754D\SAMPL000012.D ES-API, Scan, Frag: 100, "NEG"

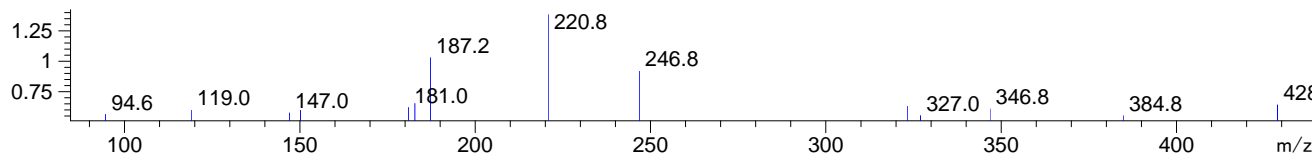

Supplement: supp2 [file elife-53779-supp2-v2.zip]
