# Supplementary material for: Structure-based discovery of potent and selective melatonin receptor agonists
Source: eLife journal article supplement (doi:10.7554/elife.53779), 2020-03-02
Supplement: supp2 [file elife-53779-supp2-v2.zip]

## Certificate of Analysis

**Key Organics Sample ID:** 9E-001  
**Batch No:** 64730  
**Product Name:** 4-(2-chlorobenzoyl)-1H-pyrrole-2-carboxamide

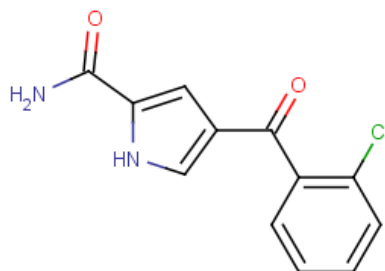

**CAS Number:** 338976-88-8  
**Molecular Formula:** C<sub>12</sub>H<sub>9</sub>ClN<sub>2</sub>O<sub>2</sub>  
**Molecular Weight:** 248.67  
**Date Printed:** Thursday, September 05, 2019

| Test                 | Specification                                   | Result   |
|----------------------|-------------------------------------------------|----------|
| Identification (NMR) | <sup>1</sup> H NMR is consistent with structure | Complies |
| Purity (NMR)         | Assessed by NMR ≥90%                            | Complies |

**Conclusion** The material complies with the specification

**Authorised**



**Project Manager**
