# Supplementary material for: Structure-based discovery of potent and selective melatonin receptor agonists
Source: eLife journal article supplement (doi:10.7554/elife.53779), 2020-03-02

MaxPeak: 98.89%  
Ret\_Time: 0.951 min

L693635\$5

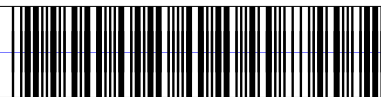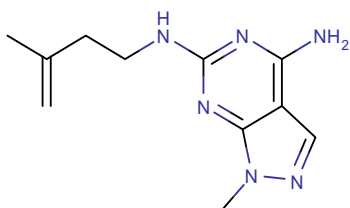

Mol Wt 232.28  
Exact Mass 232.16

| # | Time  | Area% |
|---|-------|-------|
| 1 | 0.951 | 98.89 |
| 2 | 1.116 | 1.11  |

DAD1 A, Sig=215,16 Ref=off (D:\DATE\0305\L084557D\SAMPL000024.D)

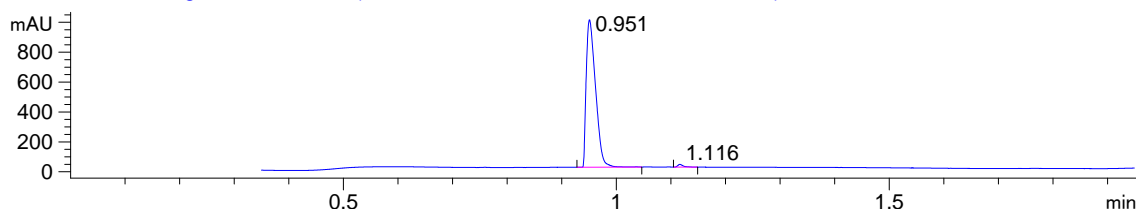

DAD1 B, Sig=254,16 Ref=off (D:\DATE\0305\L084557D\SAMPL000024.D)

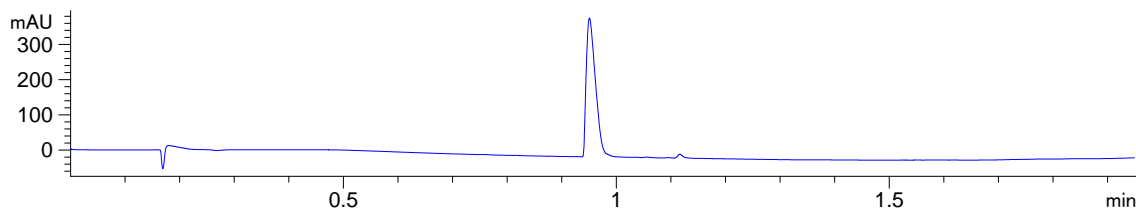

MSD1 TIC, MS File (D:\DATE\0305\L084557D\SAMPL000024.D) ES-API, Scan, Frag: 100, "POS"

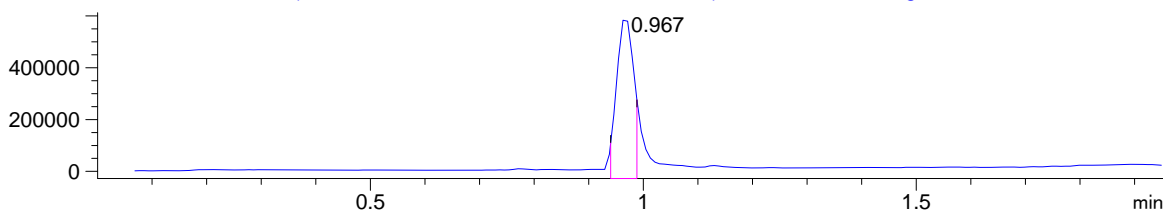

MSD2 TIC, MS File (D:\DATE\0305\L084557D\SAMPL000024.D) ES-API, Scan, Frag: 100, "NEG"

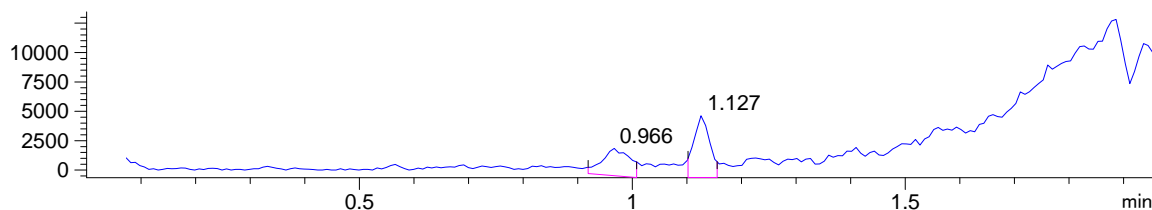

ADC1 A, ELSD (D:\DATE\0305\L084557D\SAMPL000024.D)

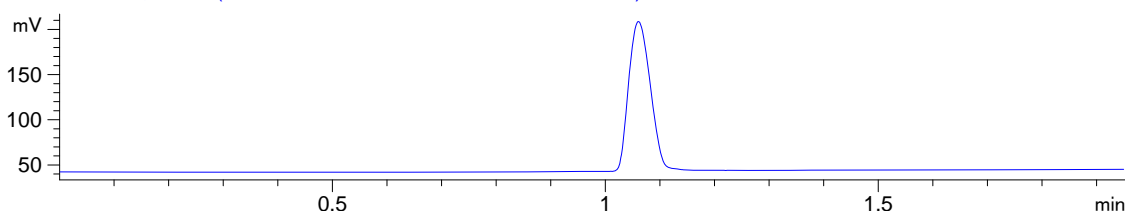

RT 0.967

\*MSD1 SPC, time=0.963 of D:\DATE\0305\L084557D\SAMPL000024.D ES-API, Scan, Frag: 100, "POS"

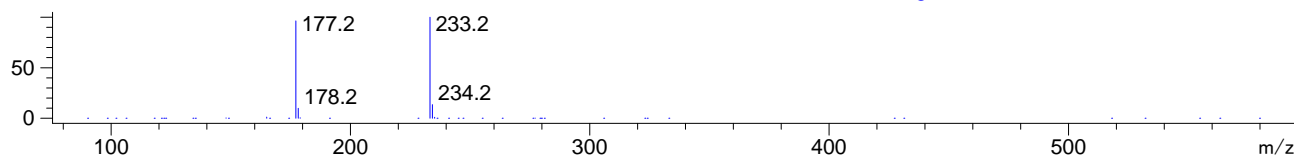

RT 0.966

\*MSD2 SPC, time=0.967 of D:\DATE\0305\L084557D\SAMPL000024.D ES-API, Scan, Frag: 100, "NEG"

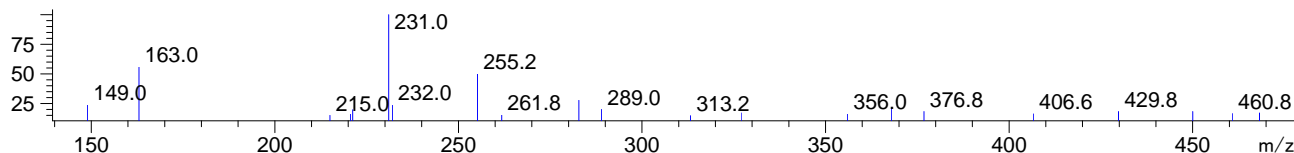

RT 1.127

\*MSD2 SPC, time=1.126 of D:\DATE\0305\L084557D\SAMPL000024.D ES-API, Scan, Frag: 100, "NEG"

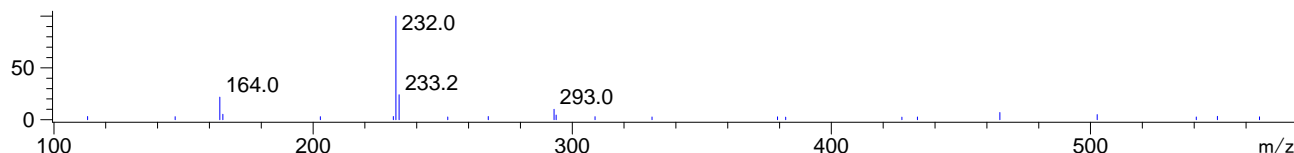

Supplement: supp2 [file elife-53779-supp2-v2.zip]
