# Supplementary material for: Structure-based discovery of potent and selective melatonin receptor agonists
Source: eLife journal article supplement (doi:10.7554/elife.53779), 2020-03-02
Supplement: supp2 [file elife-53779-supp2-v2.zip]

1H SOKBB-0480.dx

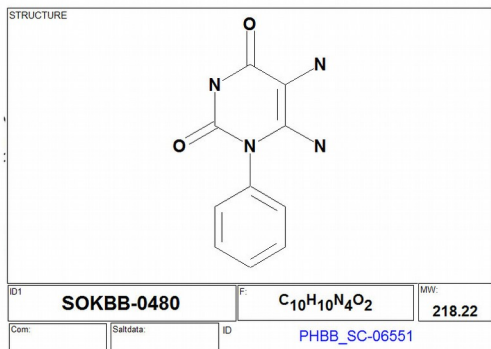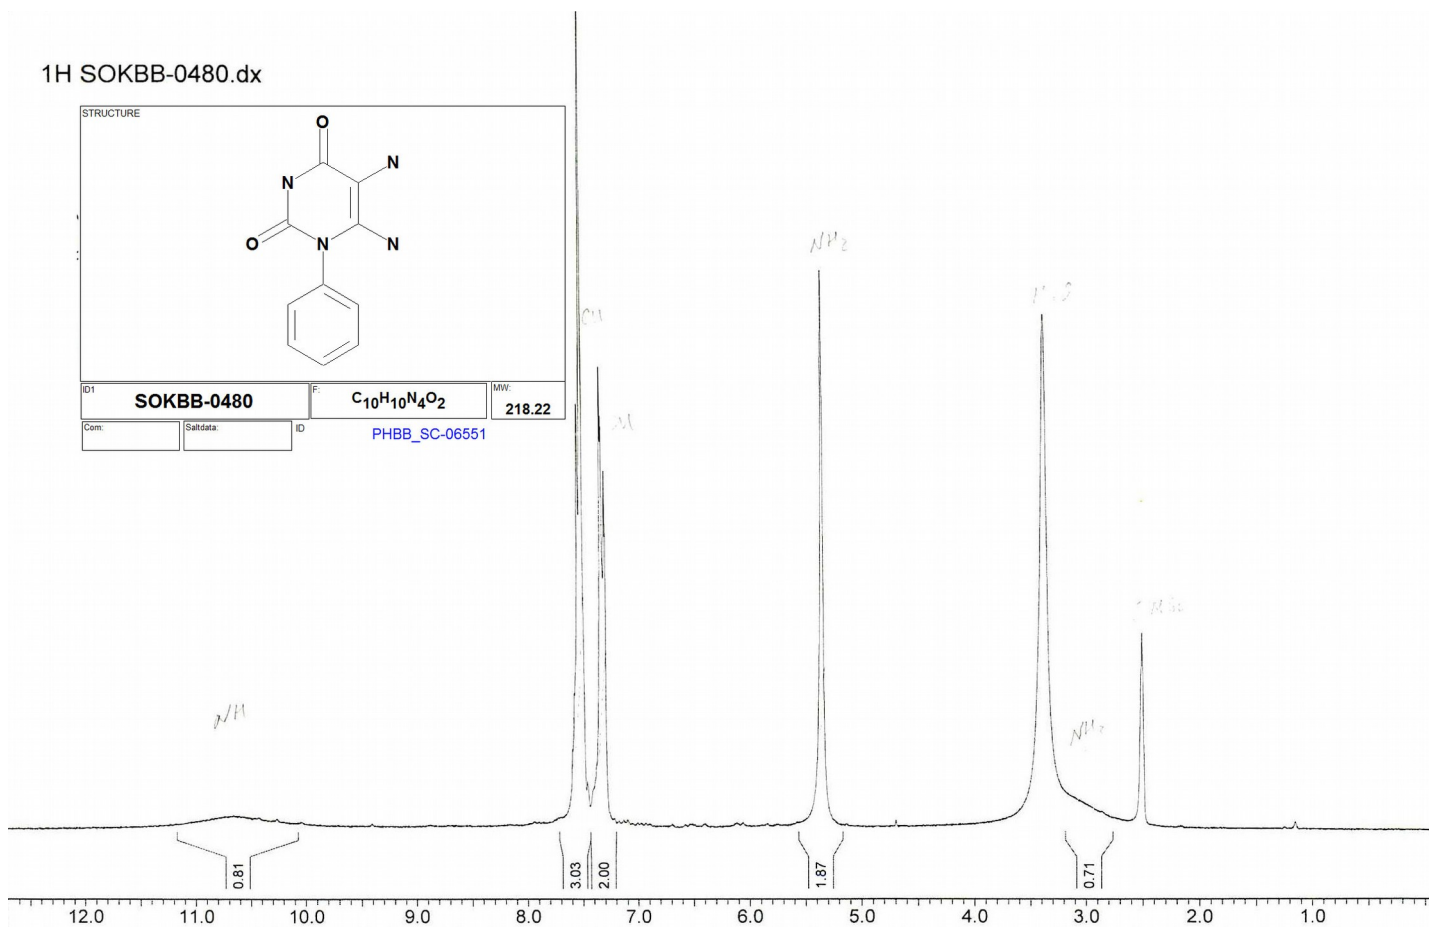

|                             |               |                  |           |                            |              |
|-----------------------------|---------------|------------------|-----------|----------------------------|--------------|
| File name: 1H SOKBB-0480.dx | Operator: pz  | SF: 200.1300 MHz | NSC: 8    | PW: 0.00 usec, RG: 500     | SI: 16384    |
|                             | Solvent: DMSO | SW: 3613 Hz      | TE: 300 K | AQ: 2.27 sec, RD: 0.00 sec | 1H_CA-c320-4 |
