# Supplementary material for: Structure-based discovery of potent and selective melatonin receptor agonists
Source: eLife journal article supplement (doi:10.7554/elife.53779), 2020-03-02

MaxPeak: 99.28%  
Ret\_Time: 0.938 min

L693612\$4

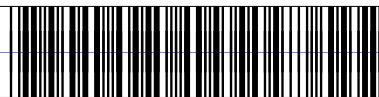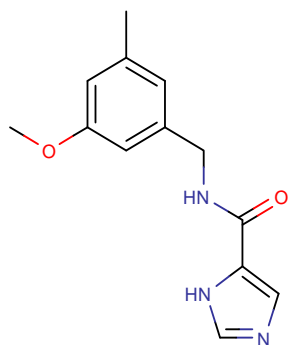

Mol Wt 245.28  
Exact Mass 245.13

| # | Time | Area% |
|---|------|-------|
|---|------|-------|

|   |       |       |
|---|-------|-------|
| 1 | 0.840 | 0.72  |
| 2 | 0.938 | 99.28 |

DAD1 A, Sig=215,16 Ref=off (D:\DATE\0305\L084557D\SAMPL000007.D)

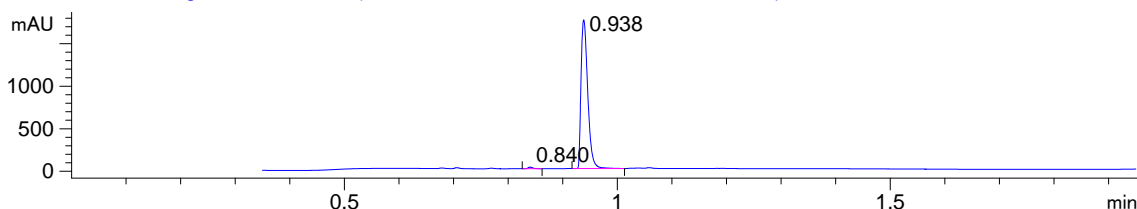

DAD1 B, Sig=254,16 Ref=off (D:\DATE\0305\L084557D\SAMPL000007.D)

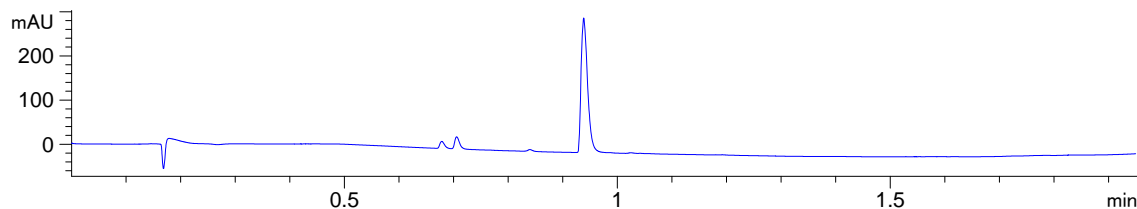

MSD1 TIC, MS File (D:\DATE\0305\L084557D\SAMPL000007.D) ES-API, Scan, Frag: 100, "POS"

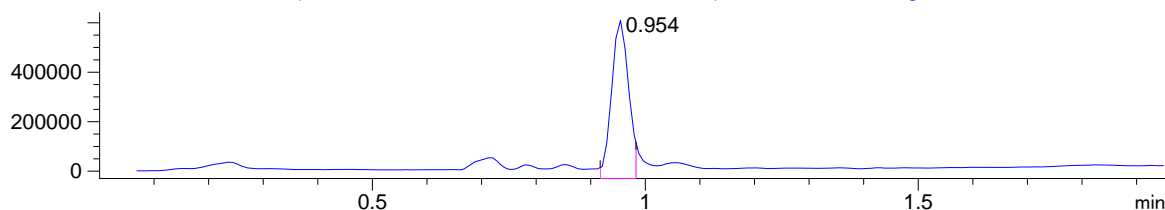

MSD2 TIC, MS File (D:\DATE\0305\L084557D\SAMPL000007.D) ES-API, Scan, Frag: 100, "NEG"

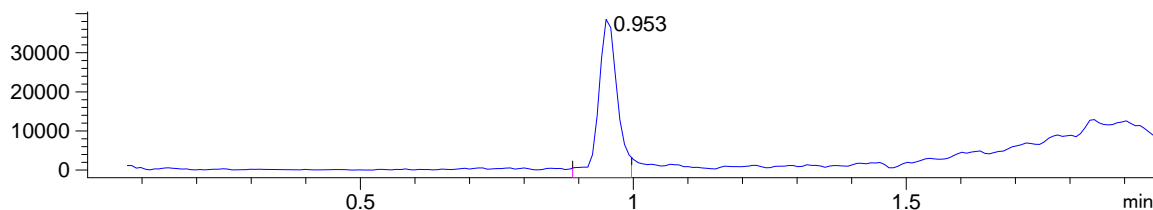

ADC1 A, ELSD (D:\DATE\0305\L084557D\SAMPL000007.D)

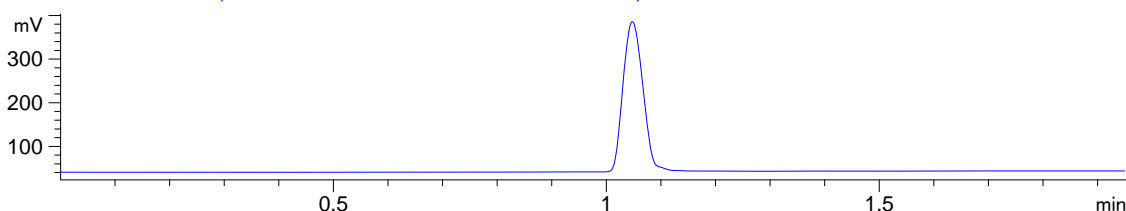

RT 0.954

\*MSD1 SPC, time=0.954 of D:\DATE\0305\L084557D\SAMPL000007.D ES-API, Scan, Frag: 100, "POS"

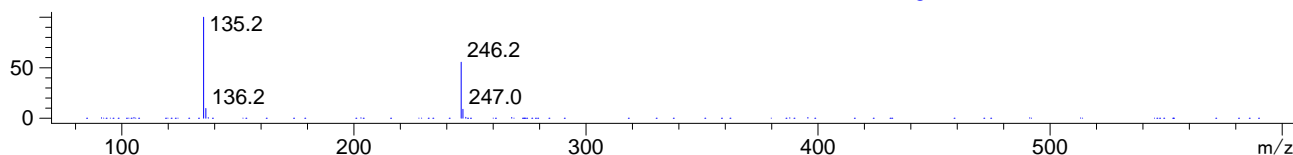

RT 0.953

\*MSD2 SPC, time=0.950 of D:\DATE\0305\L084557D\SAMPL000007.D ES-API, Scan, Frag: 100, "NEG"

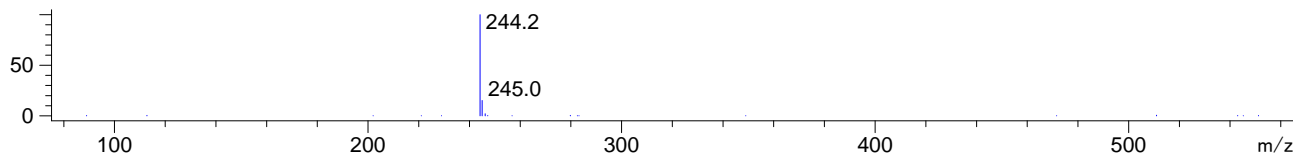

Supplement: supp2 [file elife-53779-supp2-v2.zip]
