# Supplementary material for: Structure-based discovery of potent and selective melatonin receptor agonists
Source: eLife journal article supplement (doi:10.7554/elife.53779), 2020-03-02

MaxPeak: 98.26%  
Ret\_Time: 0.877 min

L693615\$1

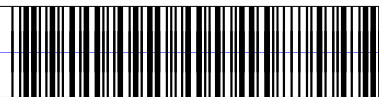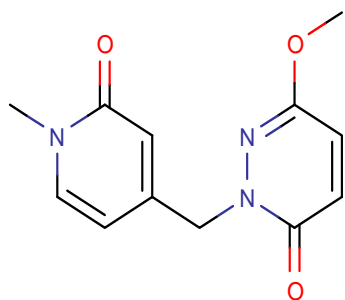

Mol Wt 247.25  
Exact Mass 247.1

| # | Time  | Area% |
|---|-------|-------|
| 1 | 0.859 | 1.74  |
| 2 | 0.877 | 98.26 |

DAD1 A, Sig=215,16 Ref=off (D:\WORK\03\03\_02\L084394D\003-D2B-A2-L693615\$1.D)

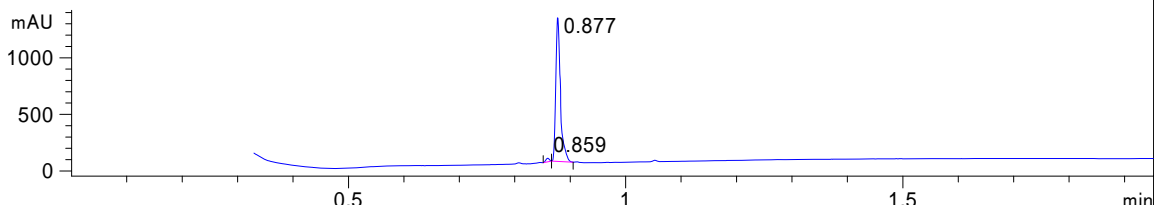

DAD1 B, Sig=254,16 Ref=off (D:\WORK\03\03\_02\L084394D\003-D2B-A2-L693615\$1.D)

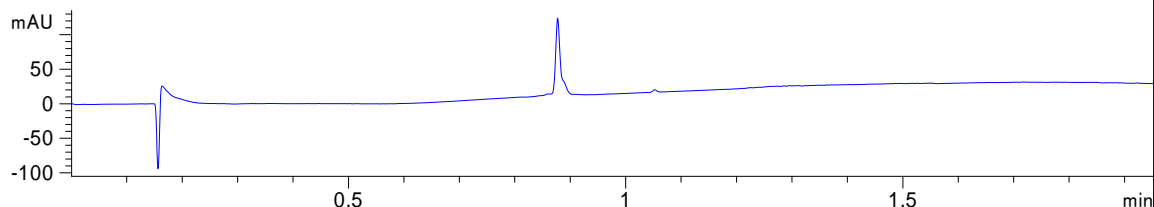

MSD1 TIC, MS File (D:\WORK\03\03\_02\L084394D\003-D2B-A2-L693615\$1.D) ES-API, Scan, Frag: 100, "POS"

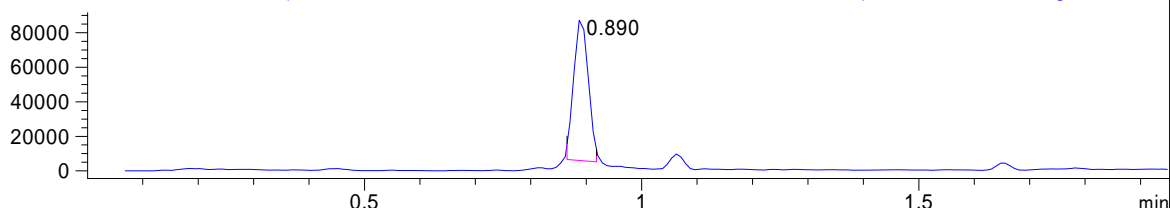

MSD2 TIC, MS File (D:\WORK\03\03\_02\L084394D\003-D2B-A2-L693615\$1.D) ES-API, Scan, Frag: 100, "NEG"

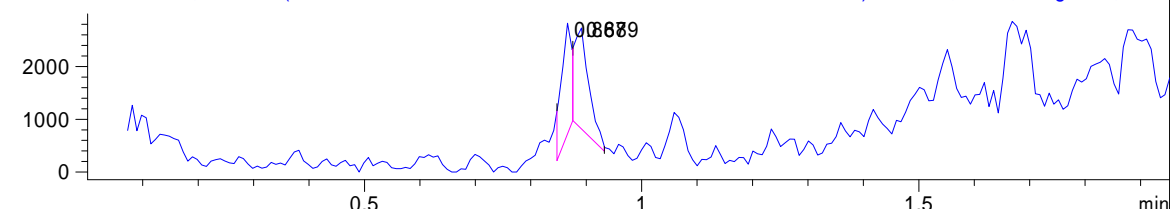

ADC1 A, ELSD (D:\WORK\03\03\_02\L084394D\003-D2B-A2-L693615\$1.D)

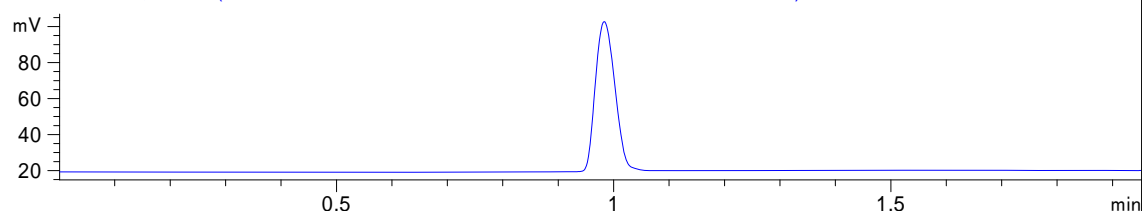

RT 0.890

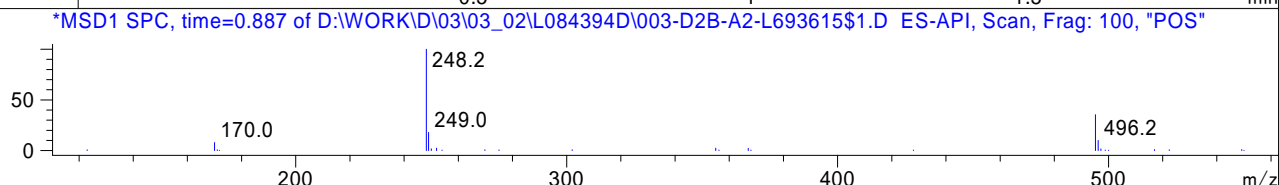

RT 0.867

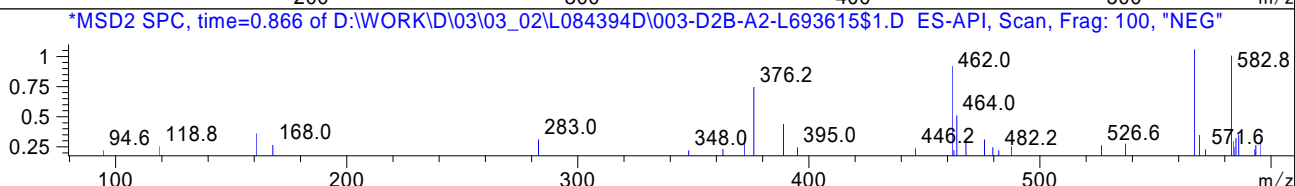

RT 0.889

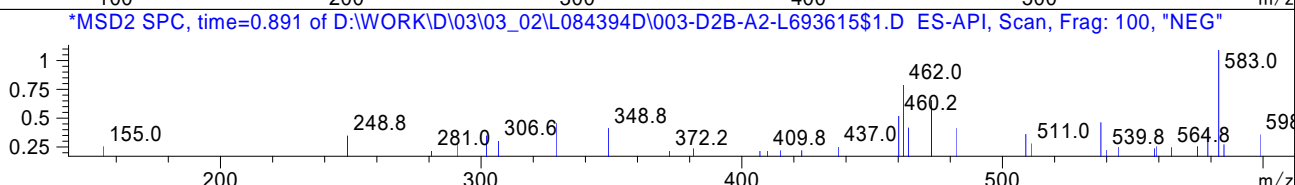

Supplement: supp2 [file elife-53779-supp2-v2.zip]
