# Supplementary material for: Structure-based discovery of potent and selective melatonin receptor agonists
Source: eLife journal article supplement (doi:10.7554/elife.53779), 2020-03-02

MaxPeak: 97.66%  
Ret\_Time: 0.978 min

L693624\$3

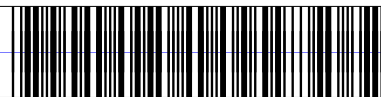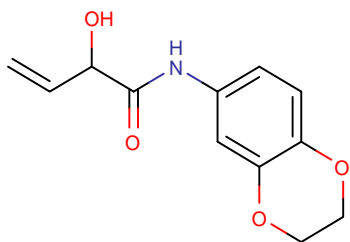

Mol Wt 235.24  
Exact Mass 235.09

# Time Area%

| # | Time  | Area% |
|---|-------|-------|
| 1 | 0.978 | 97.66 |
| 2 | 1.165 | 2.34  |

DAD1 A, Sig=215,16 Ref=off (D:\DATE\0305\L084557D\SAMPL000008.D)

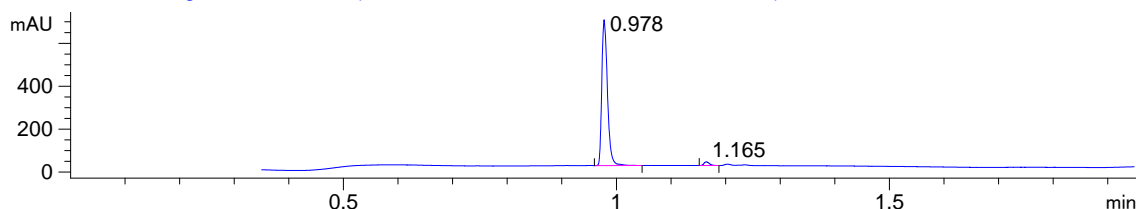

DAD1 B, Sig=254,16 Ref=off (D:\DATE\0305\L084557D\SAMPL000008.D)

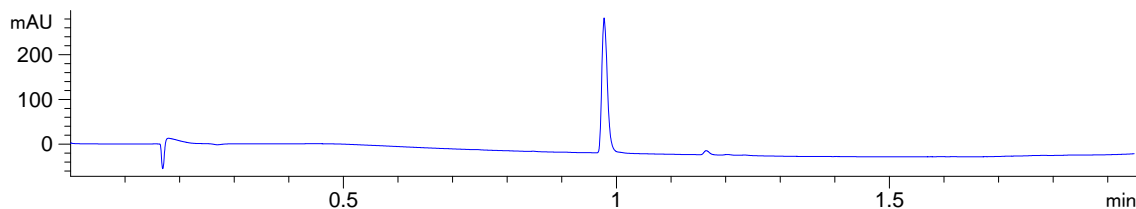

MSD1 TIC, MS File (D:\DATE\0305\L084557D\SAMPL000008.D) ES-API, Scan, Frag: 100, "POS"

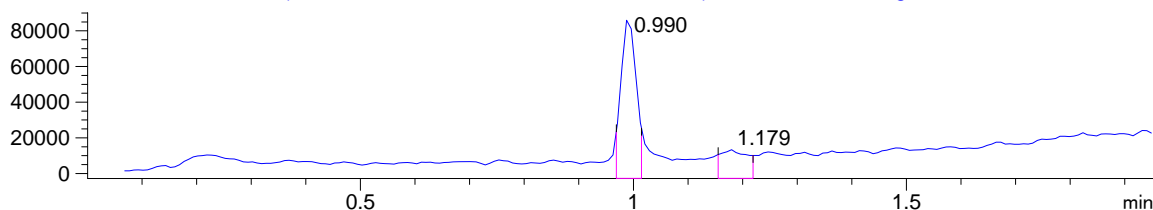

MSD2 TIC, MS File (D:\DATE\0305\L084557D\SAMPL000008.D) ES-API, Scan, Frag: 100, "NEG"

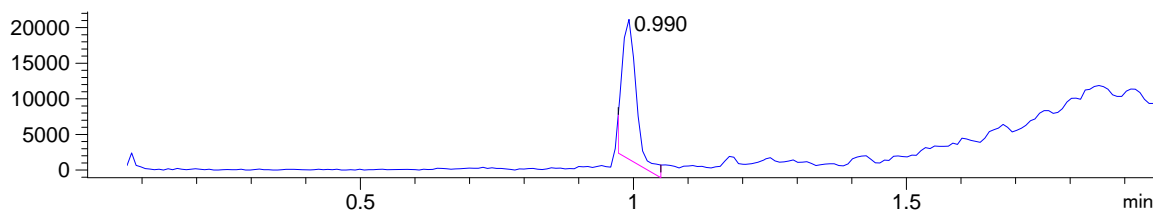

ADC1 A, ELSD (D:\DATE\0305\L084557D\SAMPL000008.D)

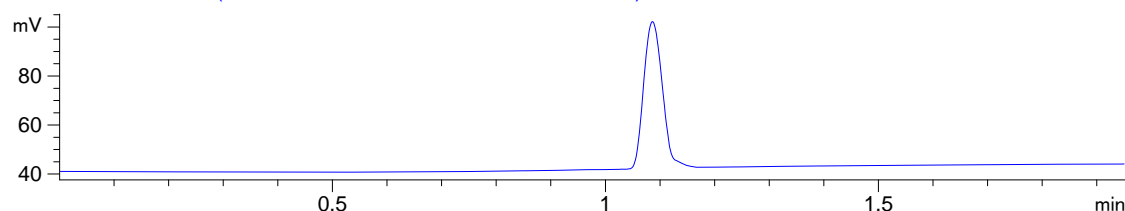

RT 0.990

\*MSD1 SPC, time=0.988 of D:\DATE\0305\L084557D\SAMPL000008.D ES-API, Scan, Frag: 100, "POS"

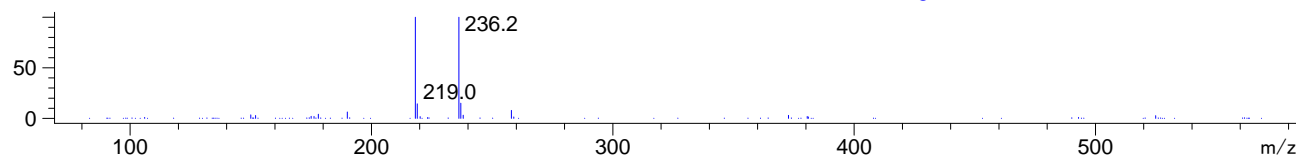

RT 1.179

\*MSD1 SPC, time=1.180 of D:\DATE\0305\L084557D\SAMPL000008.D ES-API, Scan, Frag: 100, "POS"

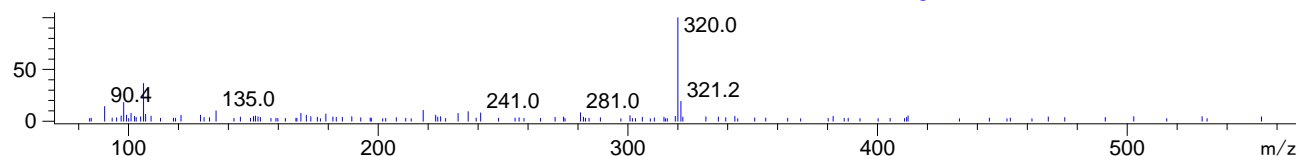

RT 0.990

\*MSD2 SPC, time=0.992 of D:\DATE\0305\L084557D\SAMPL000008.D ES-API, Scan, Frag: 100, "NEG"

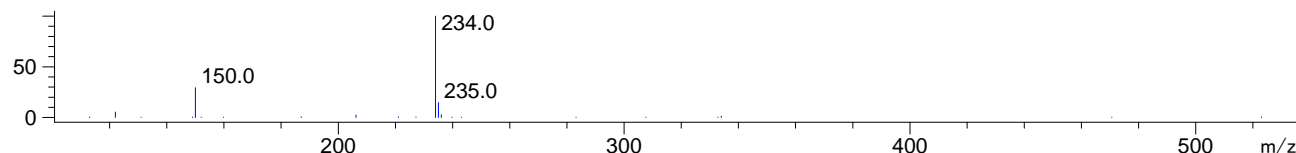

Supplement: supp2 [file elife-53779-supp2-v2.zip]
