# Supplementary material for: Structure-based discovery of potent and selective melatonin receptor agonists
Source: eLife journal article supplement (doi:10.7554/elife.53779), 2020-03-02

MaxPeak: 97.76%  
Ret\_Time: 0.708 min

L693620\$1

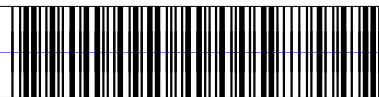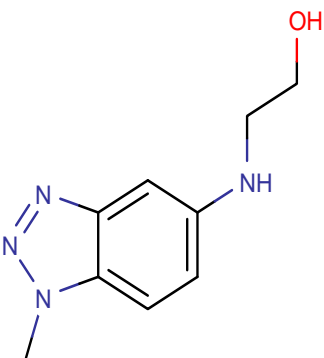

Mol Wt 192.22  
Exact Mass 192.11

| # | Time  | Area% |
|---|-------|-------|
| 1 | 0.708 | 97.76 |
| 2 | 1.088 | 1.06  |
| 3 | 1.512 | 1.18  |

DAD1 A, Sig=215,16 Ref=off (D:\WORK\03\03\_02\L084394D\011-D2B-A10-L693620\$1.D)

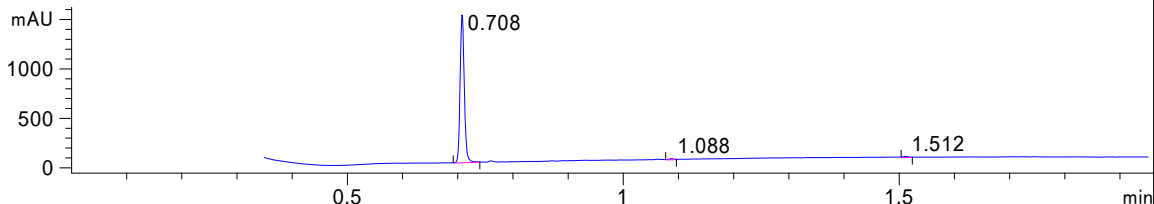

DAD1 B, Sig=254,16 Ref=off (D:\WORK\03\03\_02\L084394D\011-D2B-A10-L693620\$1.D)

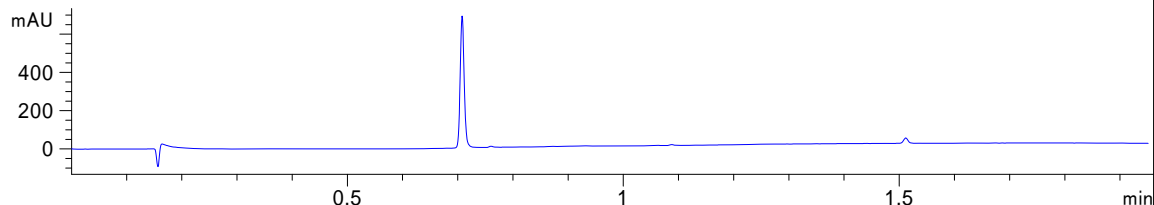

MSD1 TIC, MS File (D:\WORK\03\03\_02\L084394D\011-D2B-A10-L693620\$1.D) ES-API, Scan, Frag: 100, "POS"

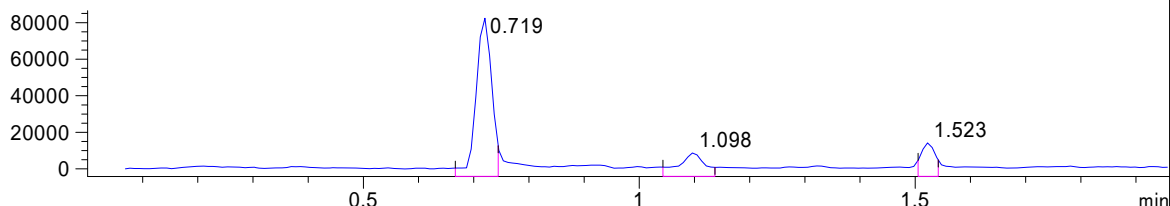

MSD2 TIC, MS File (D:\WORK\03\03\_02\L084394D\011-D2B-A10-L693620\$1.D) ES-API, Scan, Frag: 100, "NEG"

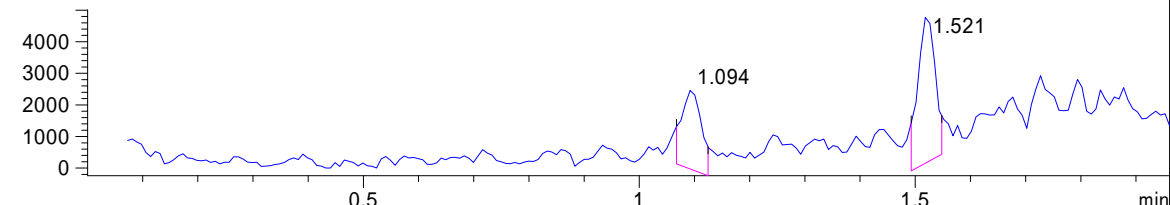

ADC1 A, ELSD (D:\WORK\03\03\_02\L084394D\011-D2B-A10-L693620\$1.D)

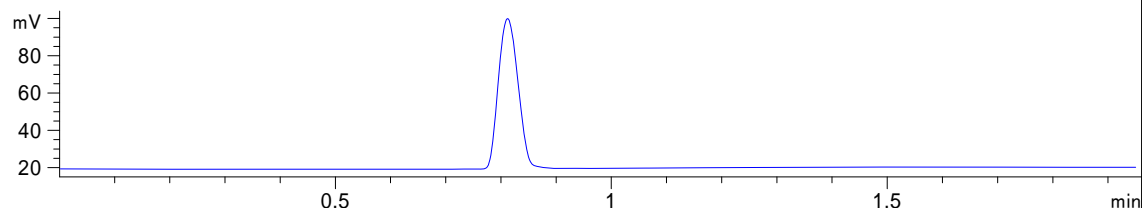

RT 0.719

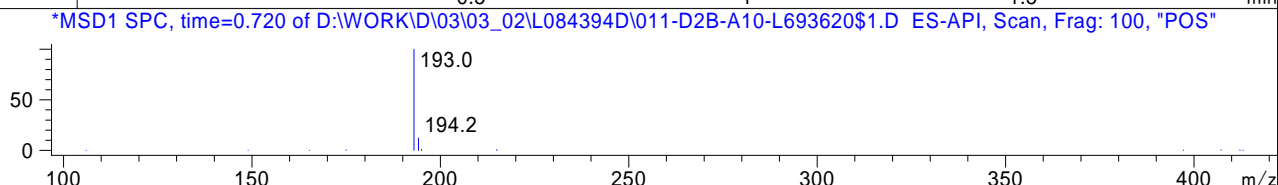

RT 1.098

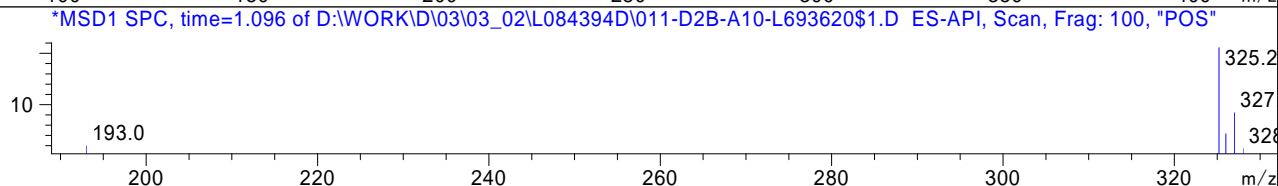

RT 1.523

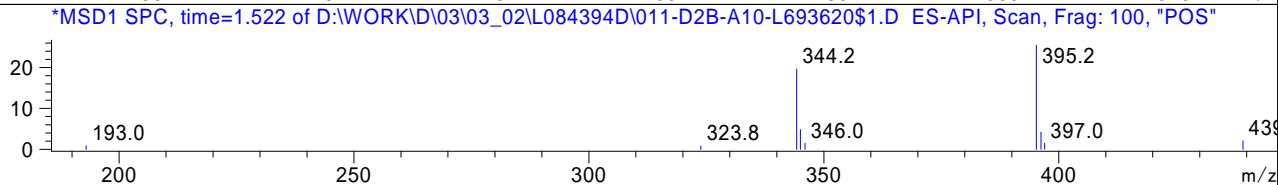

RT 1.094

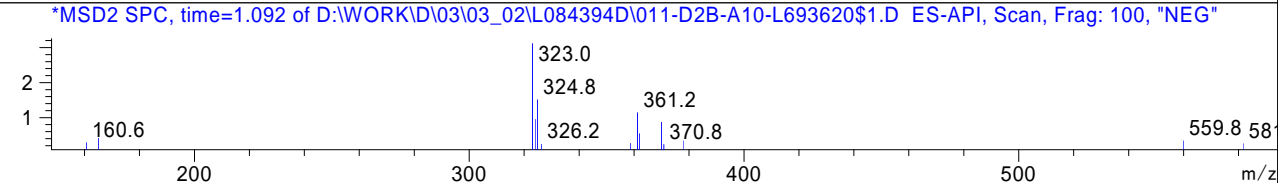

RT 1.521

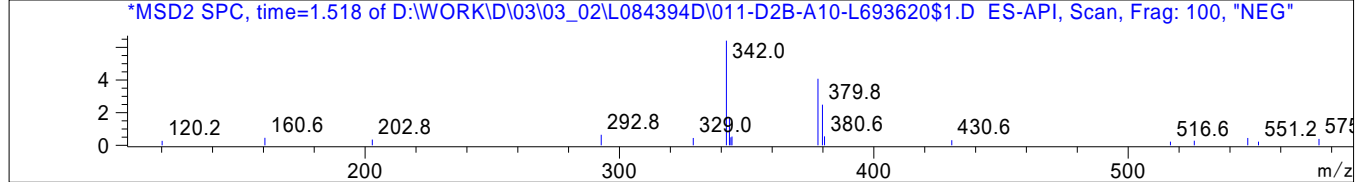

Supplement: supp2 [file elife-53779-supp2-v2.zip]
