# Supplementary material for: Structure-based discovery of potent and selective melatonin receptor agonists
Source: eLife journal article supplement (doi:10.7554/elife.53779), 2020-03-02

L693633\$2

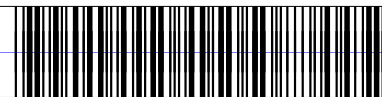

MaxPeak: 100.00%  
Ret\_Time: 0.859 min

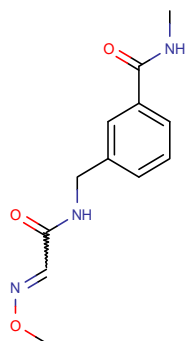

Mol Wt 249.27  
Exact Mass 249.12

| # | Time  | Area%  |
|---|-------|--------|
| 1 | 0.859 | 100.00 |

DAD1 A, Sig=215,16 Ref=off (D:\D\03\_03\L084377D\004-D7B-A3-L693633\$2.D)

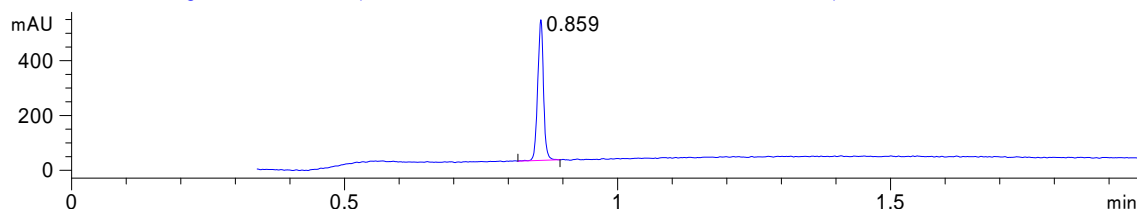

DAD1 B, Sig=254,16 Ref=off (D:\D\03\_03\L084377D\004-D7B-A3-L693633\$2.D)

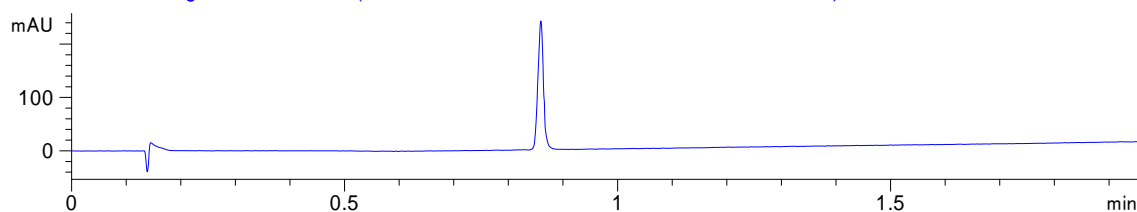

MSD1 TIC, MS File (D:\D\03\_03\L084377D\004-D7B-A3-L693633\$2.D) ES-API, Scan, Frag: 100, "POS"

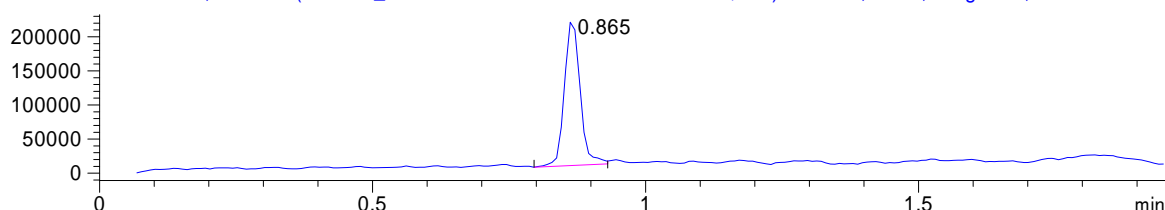

MSD2 TIC, MS File (D:\D\03\_03\L084377D\004-D7B-A3-L693633\$2.D) ES-API, Scan, Frag: 100, "NEG"

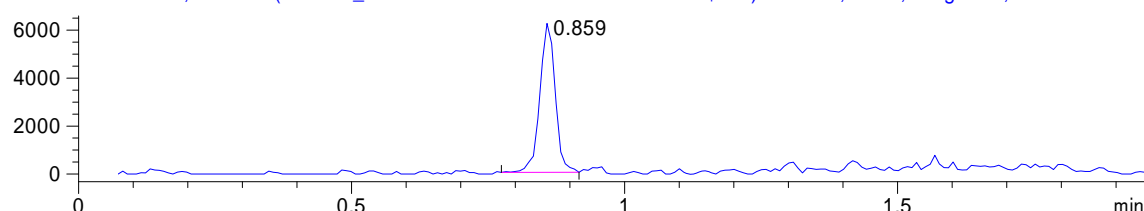

ELS1 A, ELS1A, ELSD Signal (D:\D\03\_03\L084377D\004-D7B-A3-L693633\$2.D)

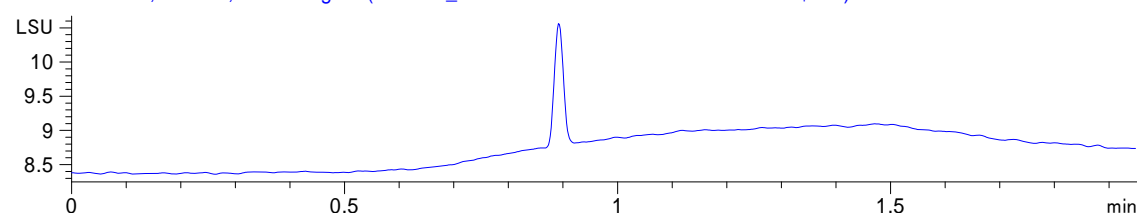

\*MSD1 SPC, time=0.862 of D:\D\03\_03\L084377D\004-D7B-A3-L693633\$2.D ES-API, Scan, Frag: 100, "POS"

RT 0.865

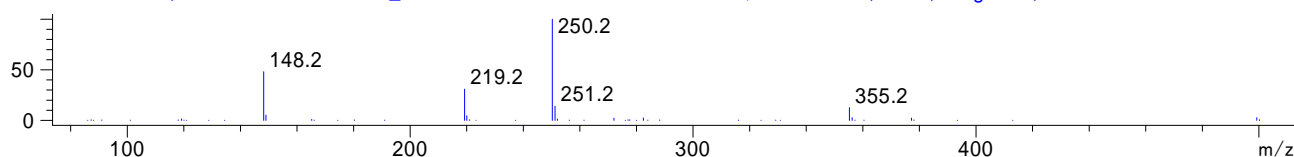

\*MSD2 SPC, time=0.858 of D:\D\03\_03\L084377D\004-D7B-A3-L693633\$2.D ES-API, Scan, Frag: 100, "NEG"

RT 0.859

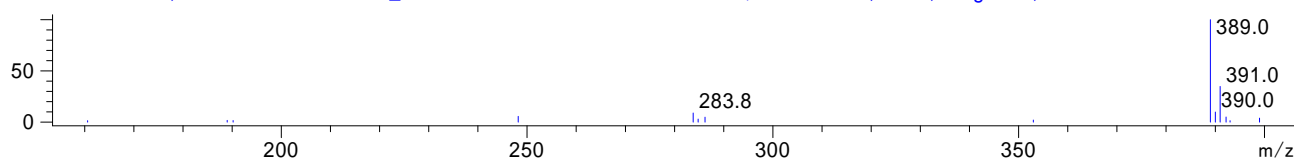

Supplement: supp2 [file elife-53779-supp2-v2.zip]
