# Supplementary material for: Structure-based discovery of potent and selective melatonin receptor agonists
Source: eLife journal article supplement (doi:10.7554/elife.53779), 2020-03-02

MaxPeak: 97.26%  
Ret\_Time: 0.691 min

L693644\$12

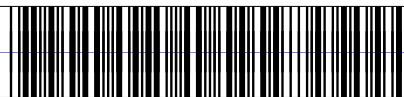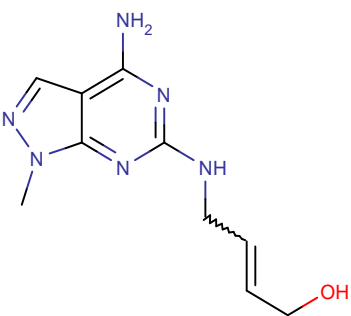

Mol Wt 234.26  
Exact Mass 234.13

| # | Time | Area% |
|---|------|-------|
|---|------|-------|

|   |       |       |
|---|-------|-------|
| 1 | 0.691 | 97.26 |
| 2 | 0.791 | 2.74  |

DAD1 A, Sig=215,16 Ref=off (D:\DATE\0307\L084904D\014-D7F-B4-L693644\$12.D)

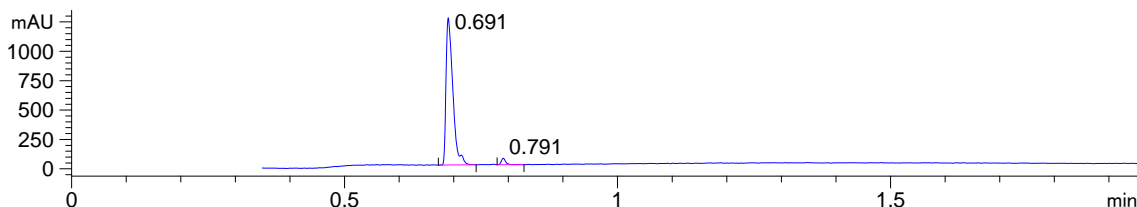

DAD1 B, Sig=254,16 Ref=off (D:\DATE\0307\L084904D\014-D7F-B4-L693644\$12.D)

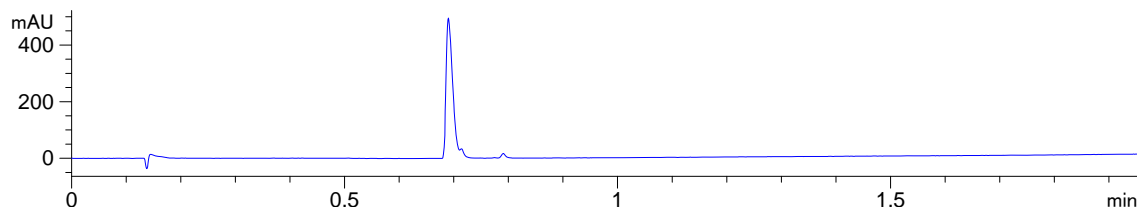

MSD1 TIC, MS File (D:\DATE\0307\L084904D\014-D7F-B4-L693644\$12.D) ES-API, Scan, Frag: 100, "POS"

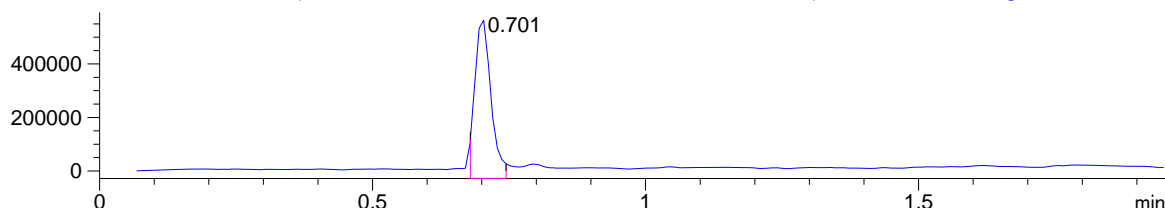

MSD2 TIC, MS File (D:\DATE\0307\L084904D\014-D7F-B4-L693644\$12.D) ES-API, Scan, Frag: 100, "NEG"

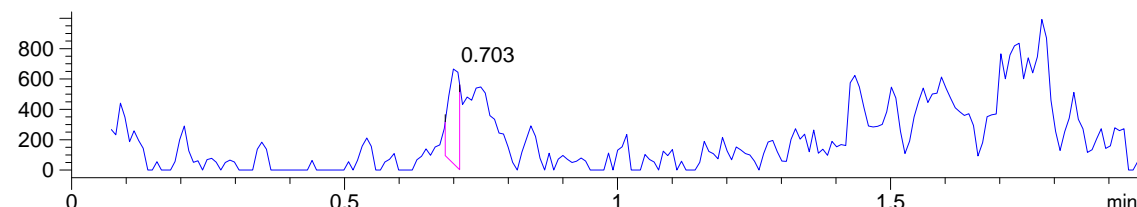

ELS1 A, ELS1A, ELSD Signal (D:\DATE\0307\L084904D\014-D7F-B4-L693644\$12.D)

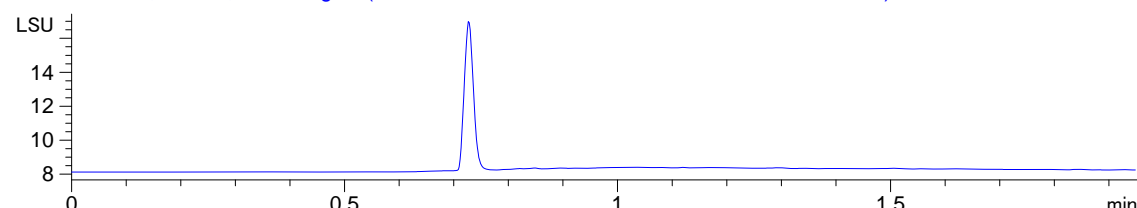

RT 0.701

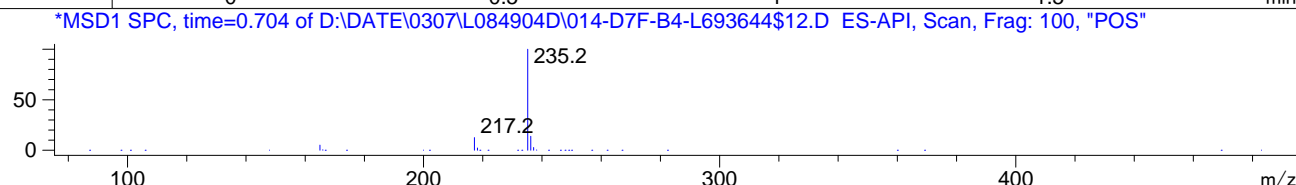

RT 0.703

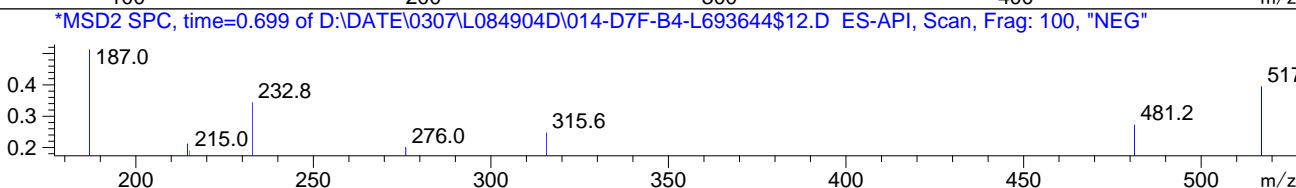

Supplement: supp2 [file elife-53779-supp2-v2.zip]
