# Supplementary material for: Structure-based discovery of potent and selective melatonin receptor agonists
Source: eLife journal article supplement (doi:10.7554/elife.53779), 2020-03-02

L693631\$12

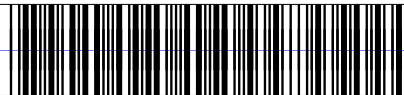

MaxPeak: 90.02%  
Ret\_Time: 0.985 min

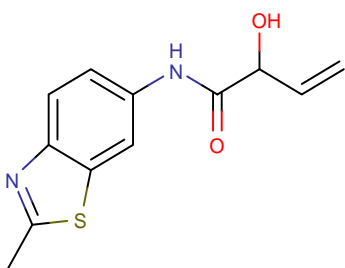

Mol Wt 248.3  
Exact Mass 248.07

| # | Time  | Area% |
|---|-------|-------|
| 1 | 0.687 | 2.63  |
| 2 | 0.985 | 90.02 |
| 3 | 1.020 | 3.51  |
| 4 | 1.162 | 3.84  |

DAD1 A, Sig=215,16 Ref=off (D:\DATA\MARCH\0703\L084895D\018-D3F-B8-L693631\$12.D)

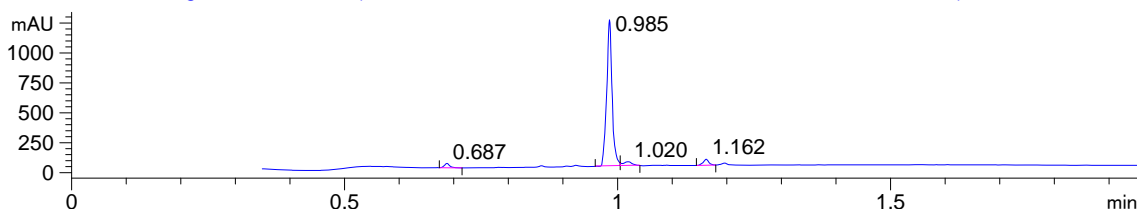

DAD1 B, Sig=254,16 Ref=off (D:\DATA\MARCH\0703\L084895D\018-D3F-B8-L693631\$12.D)

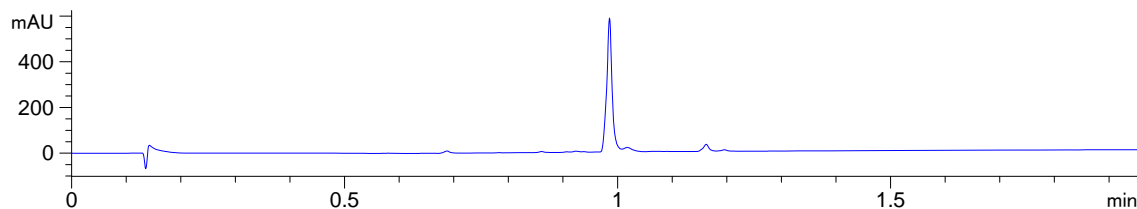

MSD1 TIC, MS File (D:\DATA\MARCH\0703\L084895D\018-D3F-B8-L693631\$12.D) ES-API, Scan, Frag: 100, "

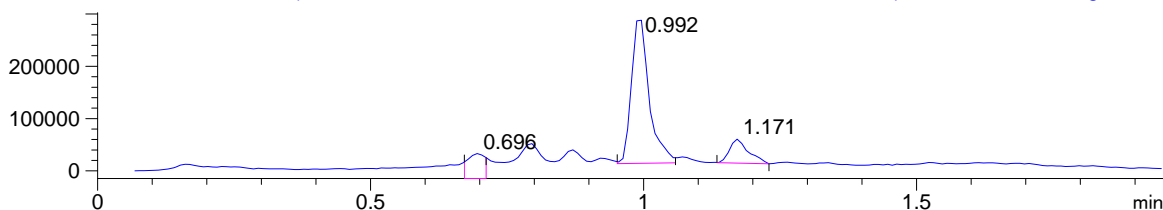

MSD2 TIC, MS File (D:\DATA\MARCH\0703\L084895D\018-D3F-B8-L693631\$12.D) ES-API, Scan, Frag: 100, "

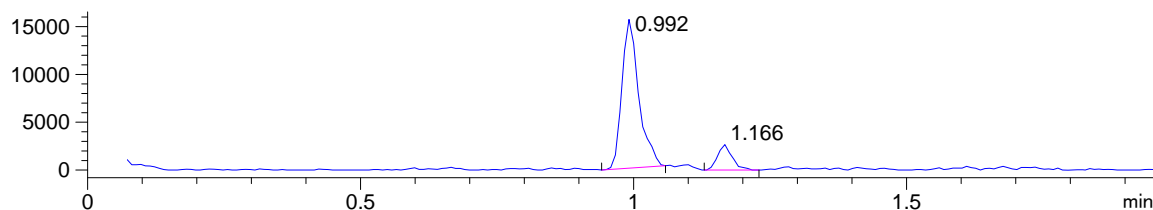

ELS1 A, ELS1A, ELSD Signal (D:\DATA\MARCH\0703\L084895D\018-D3F-B8-L693631\$12.D)

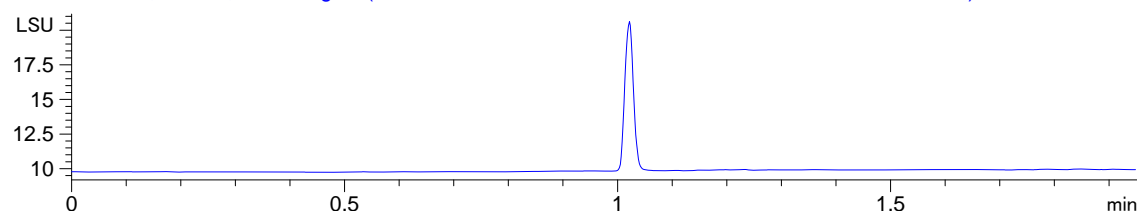

RT 0.696

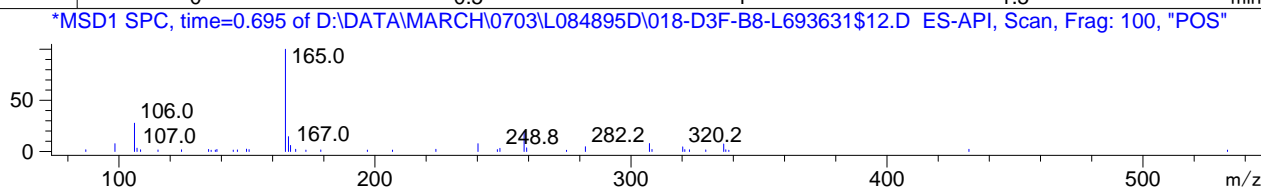

RT 0.992

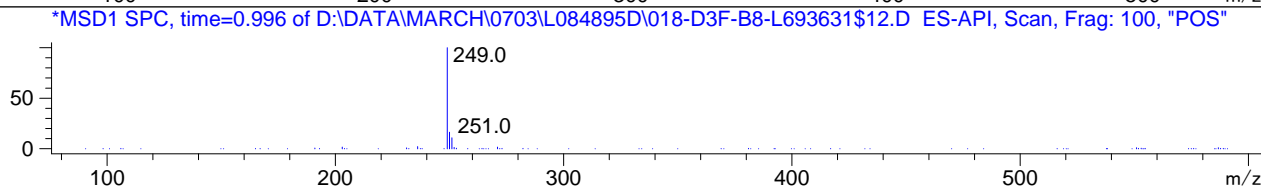

RT 1.171

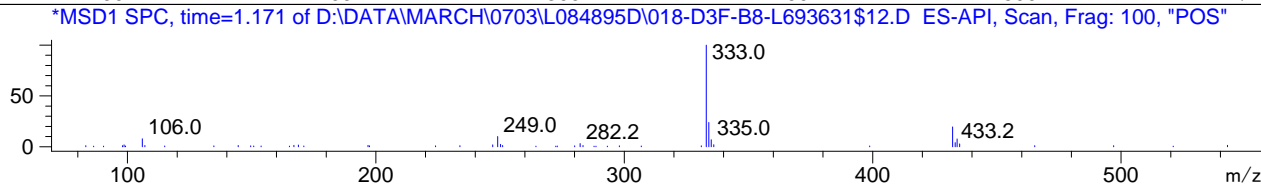

RT 0.992

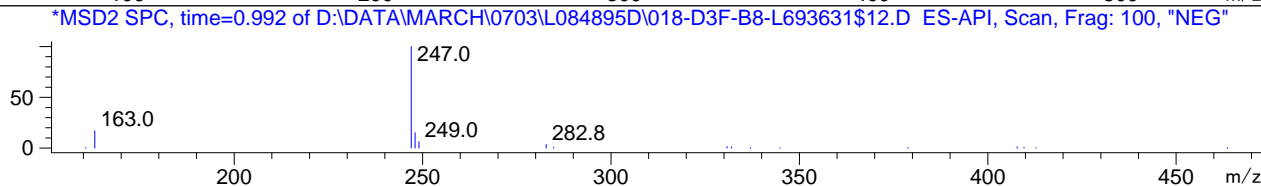

RT 1.166

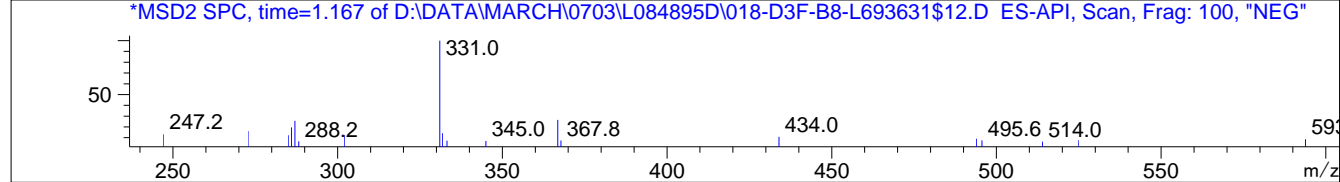

Supplement: supp2 [file elife-53779-supp2-v2.zip]
