# Supplementary material for: Structure-based discovery of potent and selective melatonin receptor agonists
Source: eLife journal article supplement (doi:10.7554/elife.53779), 2020-03-02

MaxPeak: 96.05%  
Ret\_Time: 0.149 min

L693618\$4

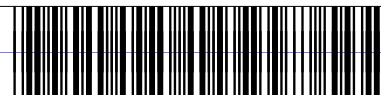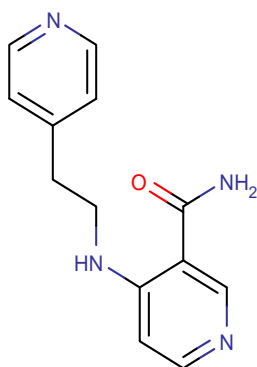

Mol Wt 242.28  
Exact Mass 242.13

| # | Time  | Area% |
|---|-------|-------|
| 1 | 0.149 | 96.05 |
| 2 | 0.192 | 3.95  |

DAD1 A, Sig=215,16 Ref=off (D:\DATE\MART\0603\VSTL084653\SAMPL000021.D)

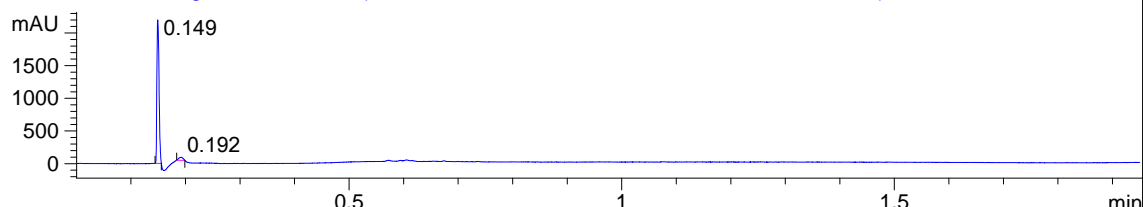

DAD1 B, Sig=254,16 Ref=off (D:\DATE\MART\0603\VSTL084653\SAMPL000021.D)

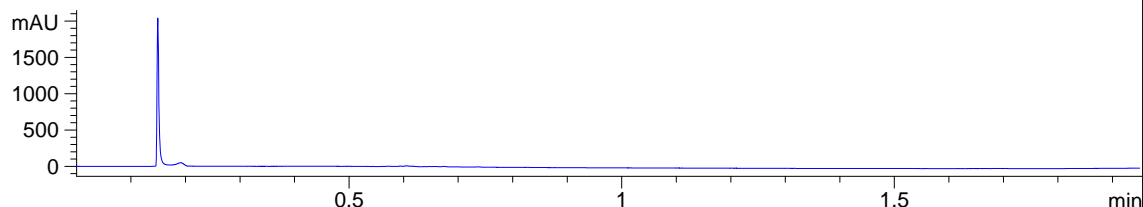

MSD1 TIC, MS File (D:\DATE\MART\0603\VSTL084653\SAMPL000021.D) ES-API, Scan, Frag: 100, "POS"

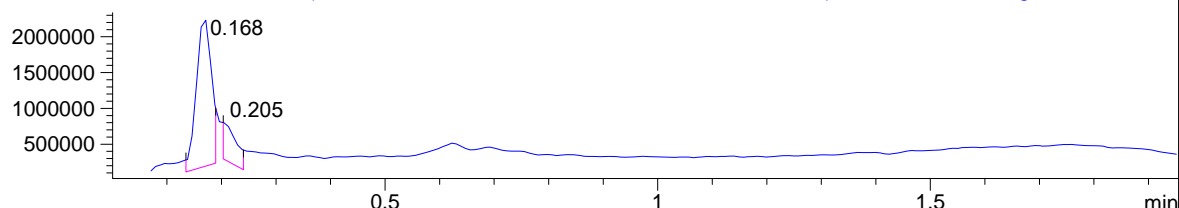

MSD2 TIC, MS File (D:\DATE\MART\0603\VSTL084653\SAMPL000021.D) ES-API, Scan, Frag: 100, "NEG"

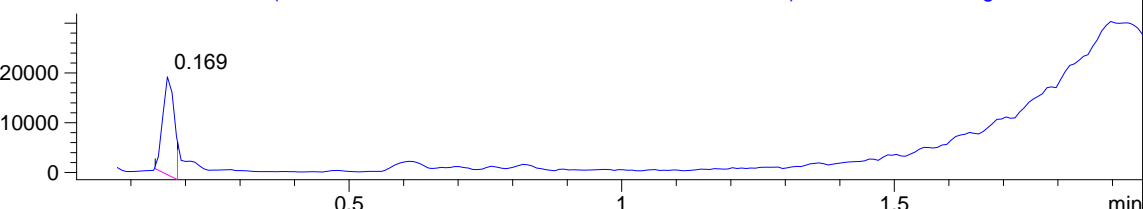

ADC1 A, ELSD (D:\DATE\MART\0603\VSTL084653\SAMPL000021.D)

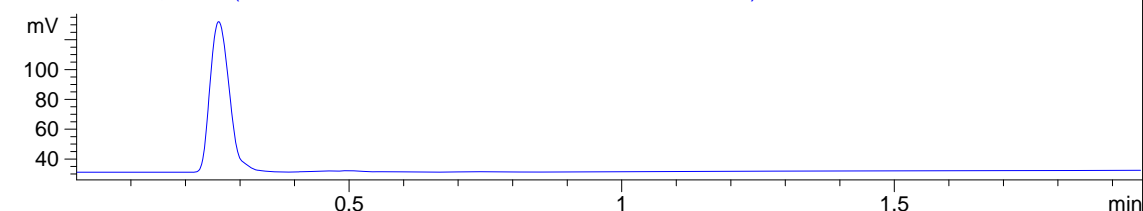

\*MSD1 SPC, time=0.171 of D:\DATE\MART\0603\VSTL084653\SAMPL000021.D ES-API, Scan, Frag: 100, "POS"

RT 0.168

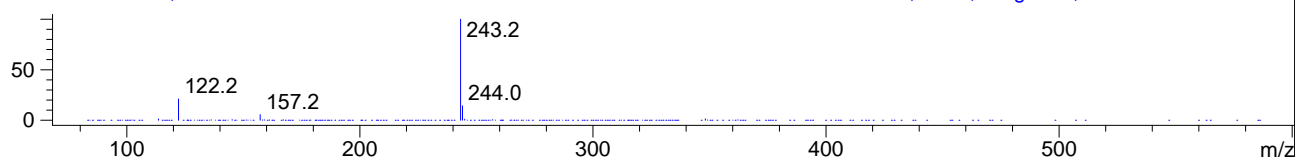

\*MSD1 SPC, time=0.205 of D:\DATE\MART\0603\VSTL084653\SAMPL000021.D ES-API, Scan, Frag: 100, "POS"

RT 0.205

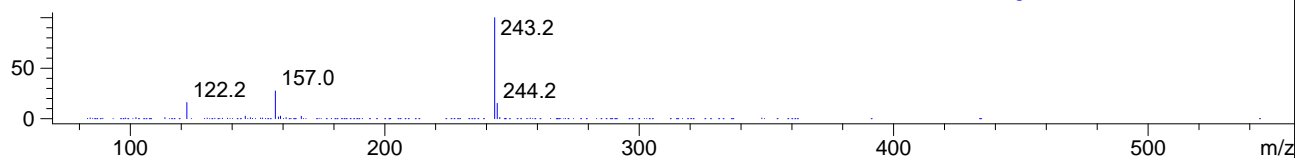

\*MSD2 SPC, time=0.167 of D:\DATE\MART\0603\VSTL084653\SAMPL000021.D ES-API, Scan, Frag: 100, "NEG"

RT 0.169

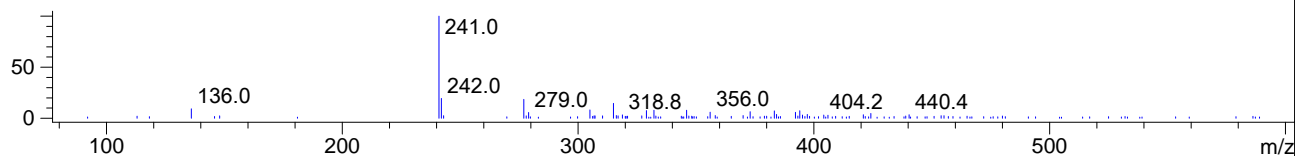

Supplement: supp2 [file elife-53779-supp2-v2.zip]
