# Supplementary material for: Structure-based discovery of potent and selective melatonin receptor agonists
Source: eLife journal article supplement (doi:10.7554/elife.53779), 2020-03-02

MaxPeak: 100.00%  
Ret\_Time: 0.613 min

R791347

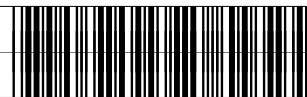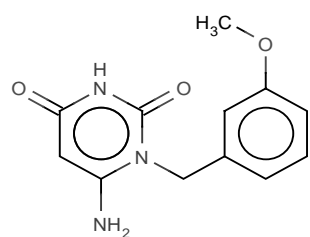

Mol Wt 247.25  
Exact Mass 247.1

| # | Time  | Area%  |
|---|-------|--------|
| 1 | 0.613 | 100.00 |

DAD1 A, Sig=215,10 Ref=off (D:\DATE\05\_18\05\_18\_19\SAMPL049.D)

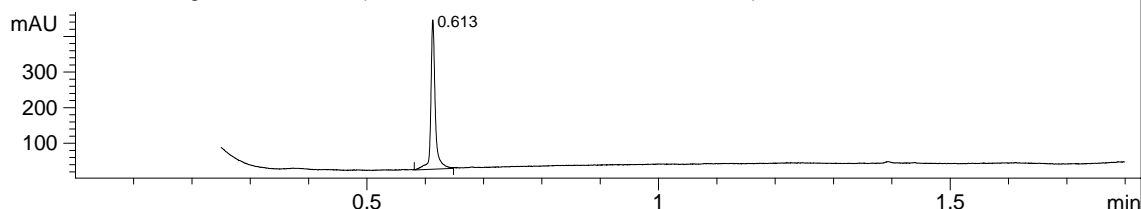

DAD1 B, Sig=254,10 Ref=off (D:\DATE\05\_18\05\_18\_19\SAMPL049.D)

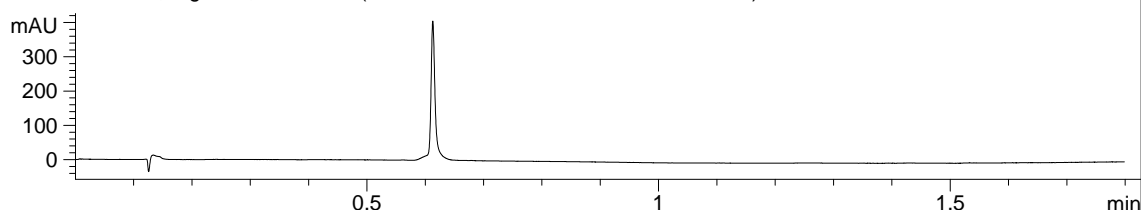

MSD1 TIC, MS File (D:\DATE\05\_18\05\_18\_19\SAMPL049.D) MM-APCI, Fast Scan, Frag: 120, "pos"

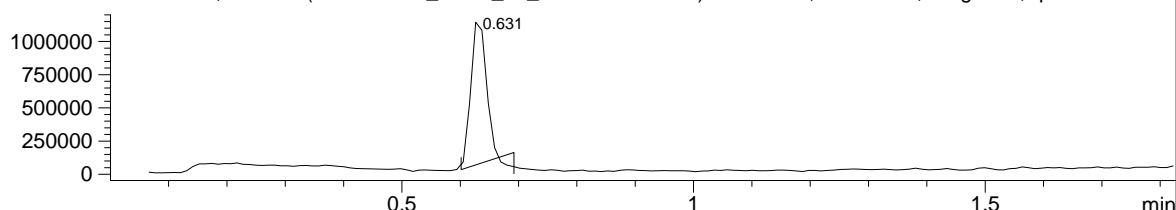

MSD2 TIC, MS File (D:\DATE\05\_18\05\_18\_19\SAMPL049.D) MM-APCI, Fast Scan, Frag: 120, "neg"

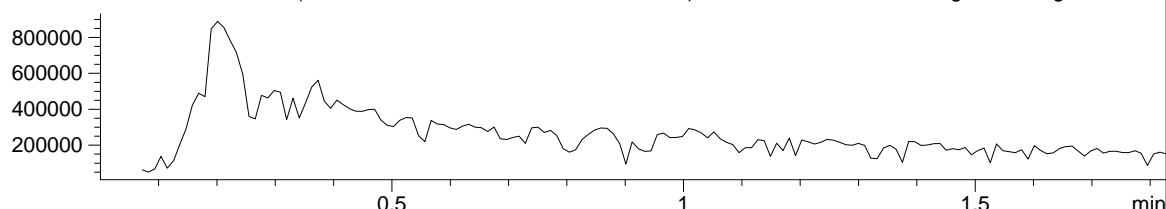

ADC1 A, ELSD (D:\DATE\05\_18\05\_18\_19\SAMPL049.D)

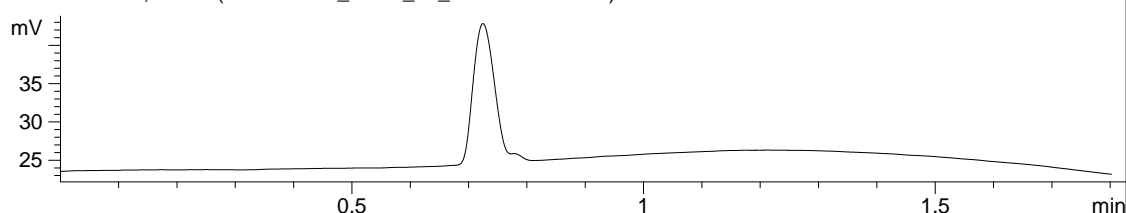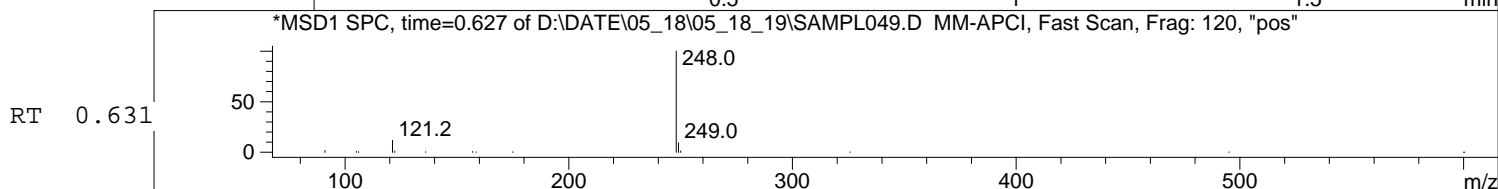

Supplement: supp2 [file elife-53779-supp2-v2.zip]
