# Supplementary material for: Structure-based discovery of potent and selective melatonin receptor agonists
Source: eLife journal article supplement (doi:10.7554/elife.53779), 2020-03-02

MaxPeak: 95.45%  
Ret\_Time: 0.731 min

L693645\$4

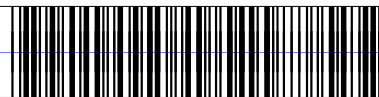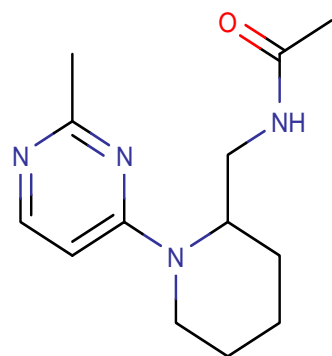

Mol Wt 248.32  
Exact Mass 248.19

| # | Time  | Area% |
|---|-------|-------|
| 1 | 0.731 | 95.45 |
| 2 | 0.778 | 1.19  |
| 3 | 0.984 | 1.49  |
| 4 | 1.341 | 1.87  |

DAD1 A, Sig=215,16 Ref=off (D:\WORK\03\03\_02\L084394D\007-D2B-A6-L693645\$4.D)

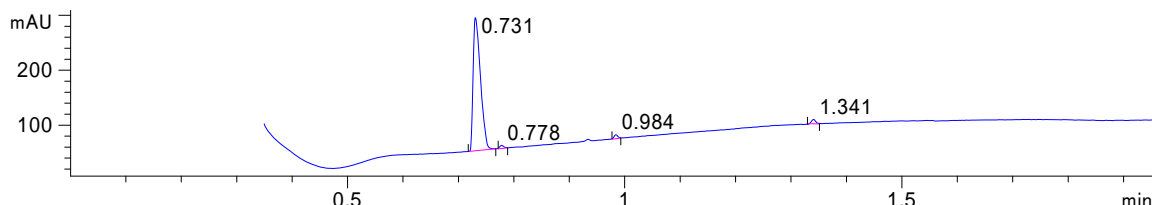

DAD1 B, Sig=254,16 Ref=off (D:\WORK\03\03\_02\L084394D\007-D2B-A6-L693645\$4.D)

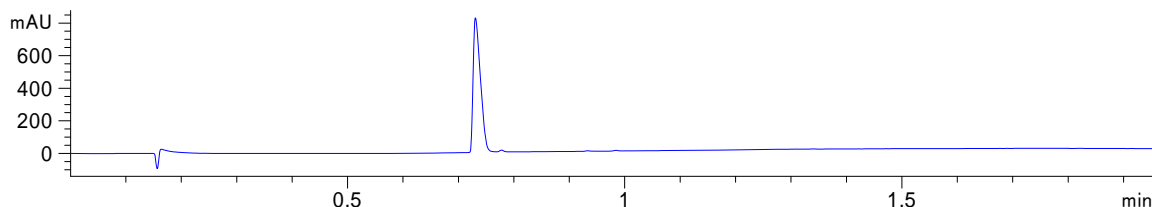

MSD1 TIC, MS File (D:\WORK\03\03\_02\L084394D\007-D2B-A6-L693645\$4.D) ES-API, Scan, Frag: 100, "POS"

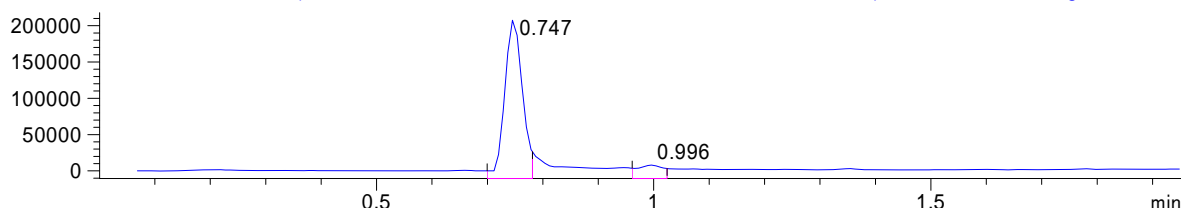

MSD2 TIC, MS File (D:\WORK\03\03\_02\L084394D\007-D2B-A6-L693645\$4.D) ES-API, Scan, Frag: 100, "NEG"

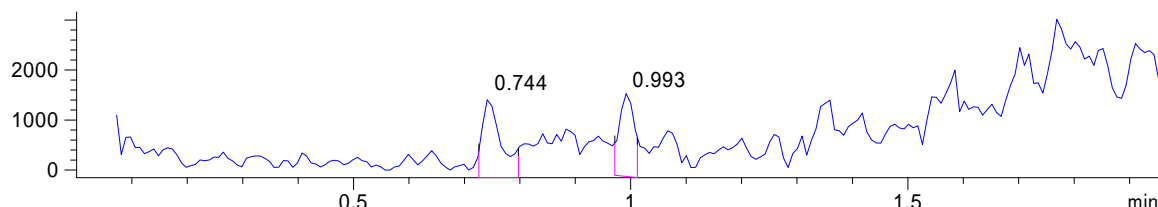

ADC1 A, ELSD (D:\WORK\03\03\_02\L084394D\007-D2B-A6-L693645\$4.D)

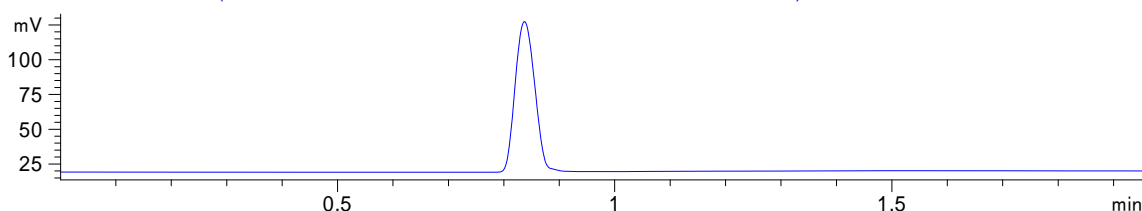

RT 0.747

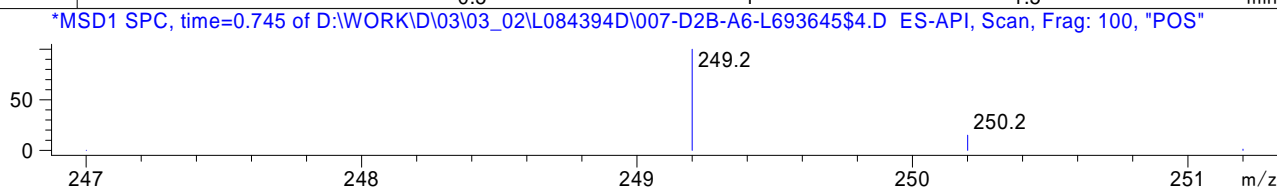

RT 0.996

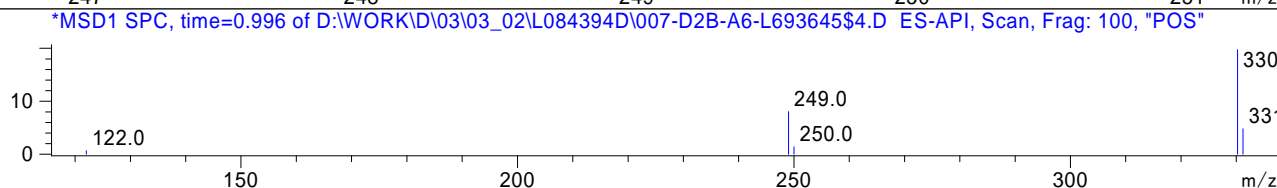

RT 0.744

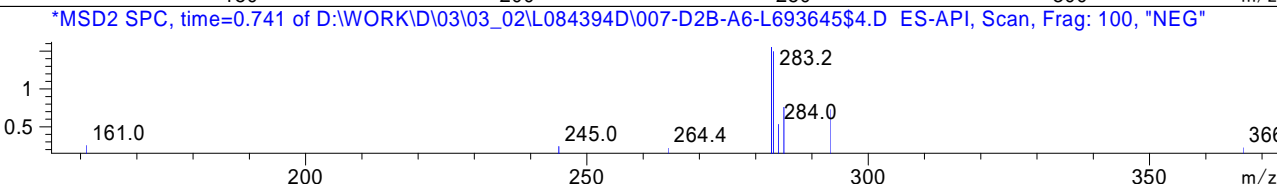

RT 0.993

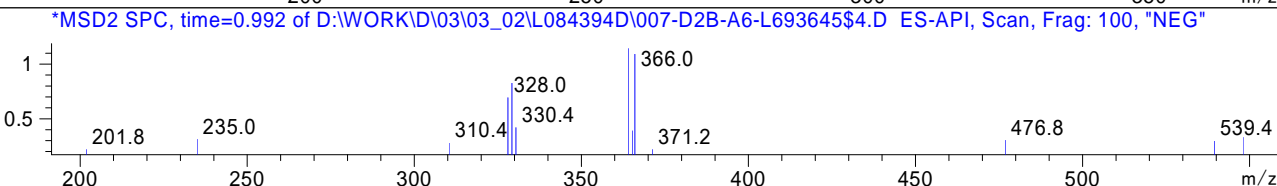

Supplement: supp2 [file elife-53779-supp2-v2.zip]
