# Supplementary material for: Structure-based discovery of potent and selective melatonin receptor agonists
Source: eLife journal article supplement (doi:10.7554/elife.53779), 2020-03-02

MaxPeak: 100.00%  
Ret\_Time: 1.178 min

L693641\$1

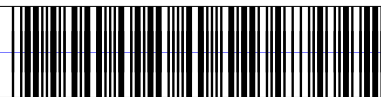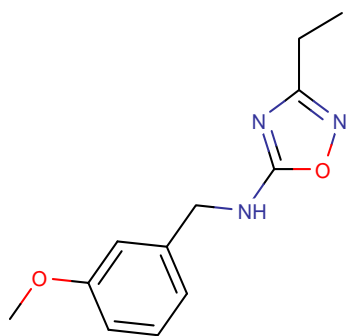

Mol Wt 233.27  
Exact Mass 233.13

| # | Time  | Area%  |
|---|-------|--------|
| 1 | 1.178 | 100.00 |

DAD1 A, Sig=215,16 Ref=off (D:\DATE\0307\L084904D\021-D7F-C2-L693641\$1.D)

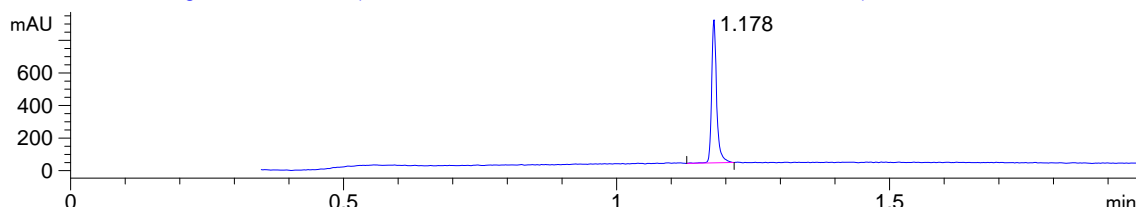

DAD1 B, Sig=254,16 Ref=off (D:\DATE\0307\L084904D\021-D7F-C2-L693641\$1.D)

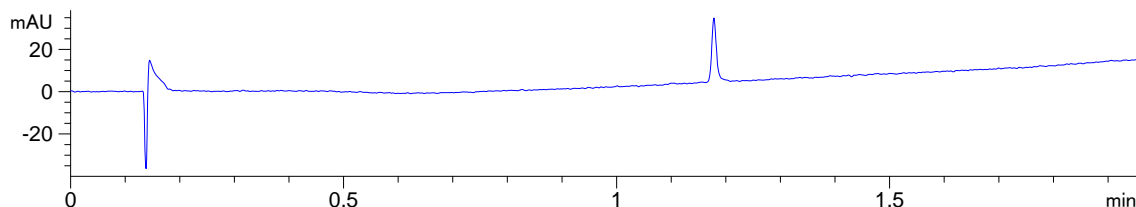

MSD1 TIC, MS File (D:\DATE\0307\L084904D\021-D7F-C2-L693641\$1.D) ES-API, Scan, Frag: 100, "POS"

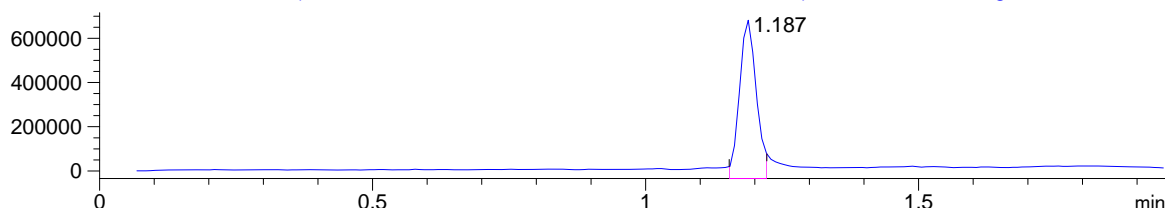

MSD2 TIC, MS File (D:\DATE\0307\L084904D\021-D7F-C2-L693641\$1.D) ES-API, Scan, Frag: 100, "NEG"

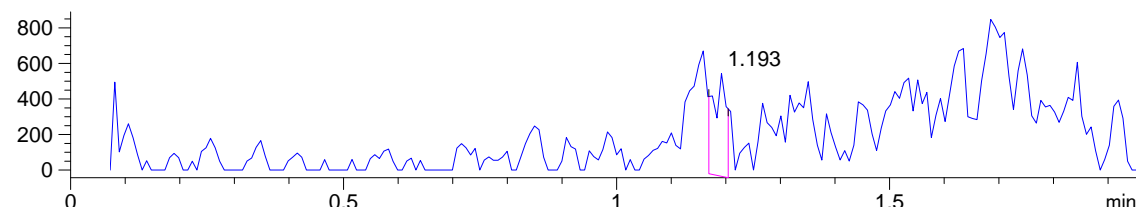

ELS1 A, ELS1A, ELSD Signal (D:\DATE\0307\L084904D\021-D7F-C2-L693641\$1.D)

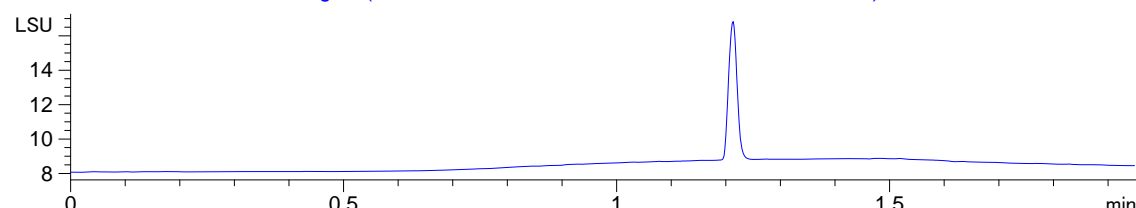

RT 1.187

\*MSD1 SPC, time=1.188 of D:\DATE\0307\L084904D\021-D7F-C2-L693641\$1.D ES-API, Scan, Frag: 100, "POS"

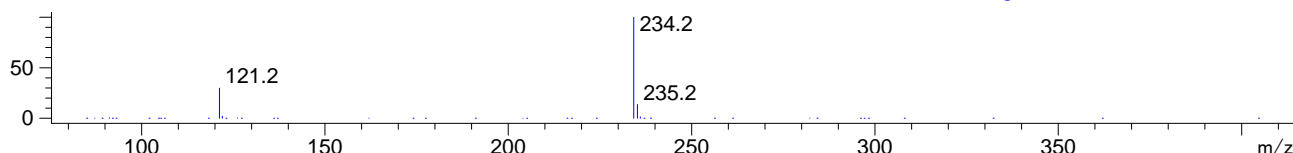

RT 1.193

\*MSD2 SPC, time=1.192 of D:\DATE\0307\L084904D\021-D7F-C2-L693641\$1.D ES-API, Scan, Frag: 100, "NEG"

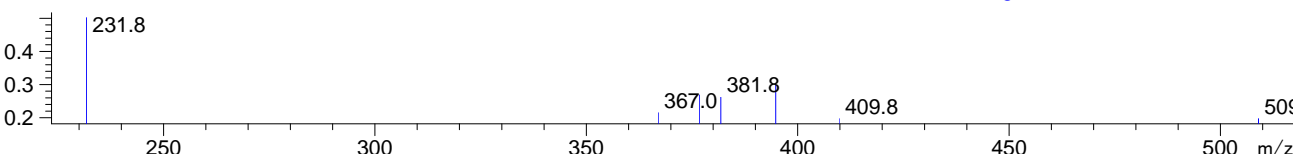

Supplement: supp2 [file elife-53779-supp2-v2.zip]
