# Supplementary material for: Structure-based discovery of potent and selective melatonin receptor agonists
Source: eLife journal article supplement (doi:10.7554/elife.53779), 2020-03-02
Supplement: supp2 [file elife-53779-supp2-v2.zip]

STRUCTURE

ID1

SOKBB-0489

F

C<sub>10</sub>H<sub>9</sub>FN<sub>4</sub>O<sub>2</sub>

MW

236.21

Com

Saldata

ID

PHBB\_SC-09695

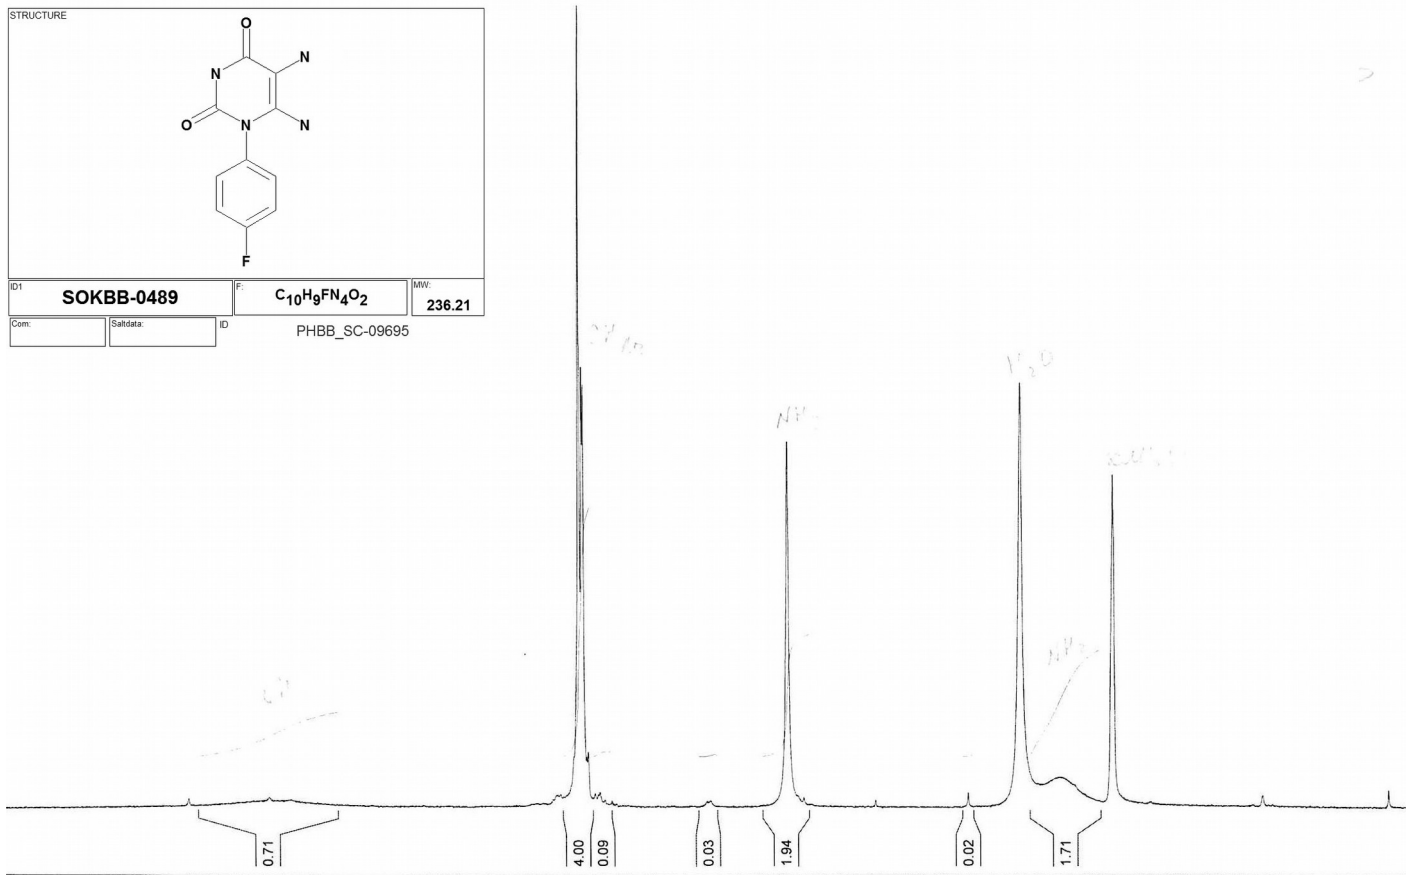

|                           |                |                  |           |                            |           |
|---------------------------|----------------|------------------|-----------|----------------------------|-----------|
| File name: SOKBB-0489.dlx | Operator: root | SF: 200.1300 MHz | NSC: 16   | PW: 0.00 usec, RG: 500     | SI: 16384 |
|                           | Solvent: DMSO  | SW: 3019 Hz      | TE: 300 K | AQ: 1.36 sec, RD: 0.00 sec | 26.10 °C  |
