# Supplementary material for: Structure-based discovery of potent and selective melatonin receptor agonists
Source: eLife journal article supplement (doi:10.7554/elife.53779), 2020-03-02
Supplement: supp2 [file elife-53779-supp2-v2.zip]

## Certificate of Analysis

**Key Organics Sample ID:** GE-0720  
**Batch No:** 101179  
**Product Name:** methyl 3-amino-4-(1H-pyrrol-1-yl)benzoate

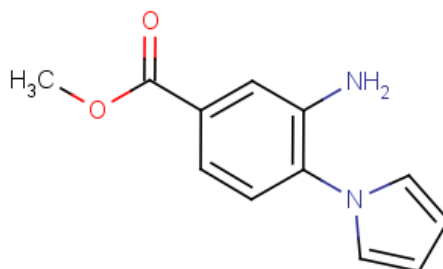

**CAS Number:** 1242267-86-2  
**Molecular Formula:** C<sub>12</sub>H<sub>12</sub>N<sub>2</sub>O<sub>2</sub>  
**Molecular Weight:** 216.24  
**Date of Analysis:** 05 September 2019  
**Retest Date:** 05 September 2024

| Test                 | Specification                                   | Result   |
|----------------------|-------------------------------------------------|----------|
| Identification (NMR) | <sup>1</sup> H NMR is consistent with structure | Complies |
| Purity (NMR)         | Assessed by NMR ≥95%                            | Complies |

**Conclusion** The material complies with the specification

**Authorised**

**Project Manager**
