# Supplementary material for: Structure-based discovery of potent and selective melatonin receptor agonists
Source: eLife journal article supplement (doi:10.7554/elife.53779), 2020-03-02

GE-0720-101179

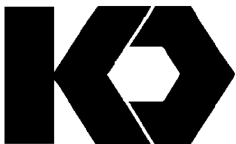

Current Data Parameters  
NAME Sep05-2019  
EXPNO 10  
PROCNO 1

F2 - Acquisition Parameters  
Date\_ 20190905  
Time 10.21 h  
INSTRUM spect  
PROBHD Z8246\_0097 (PH  
PULPROG zg30  
TD 65536  
SOLVENT CDC13  
NS 16  
DS 0  
SWH 8223.685 Hz  
FIDRES 0.250967 Hz  
AQ 3.9845889 sec  
RG 456  
DW 60.800 use  
DE 15.87 use  
TE 299.9 K  
D1 1.00000000 sec  
TD0 1  
SFO1 400.1328009 MHz  
NUC1 1H  
P1 14.80 use  
PLW1 9.19999981 W

F2 - Processing parameters  
SI 65536  
SF 400.1300105 MHz  
WDW EM  
SSB 0  
LB 0.30 Hz  
GB 0  
PC 1.40

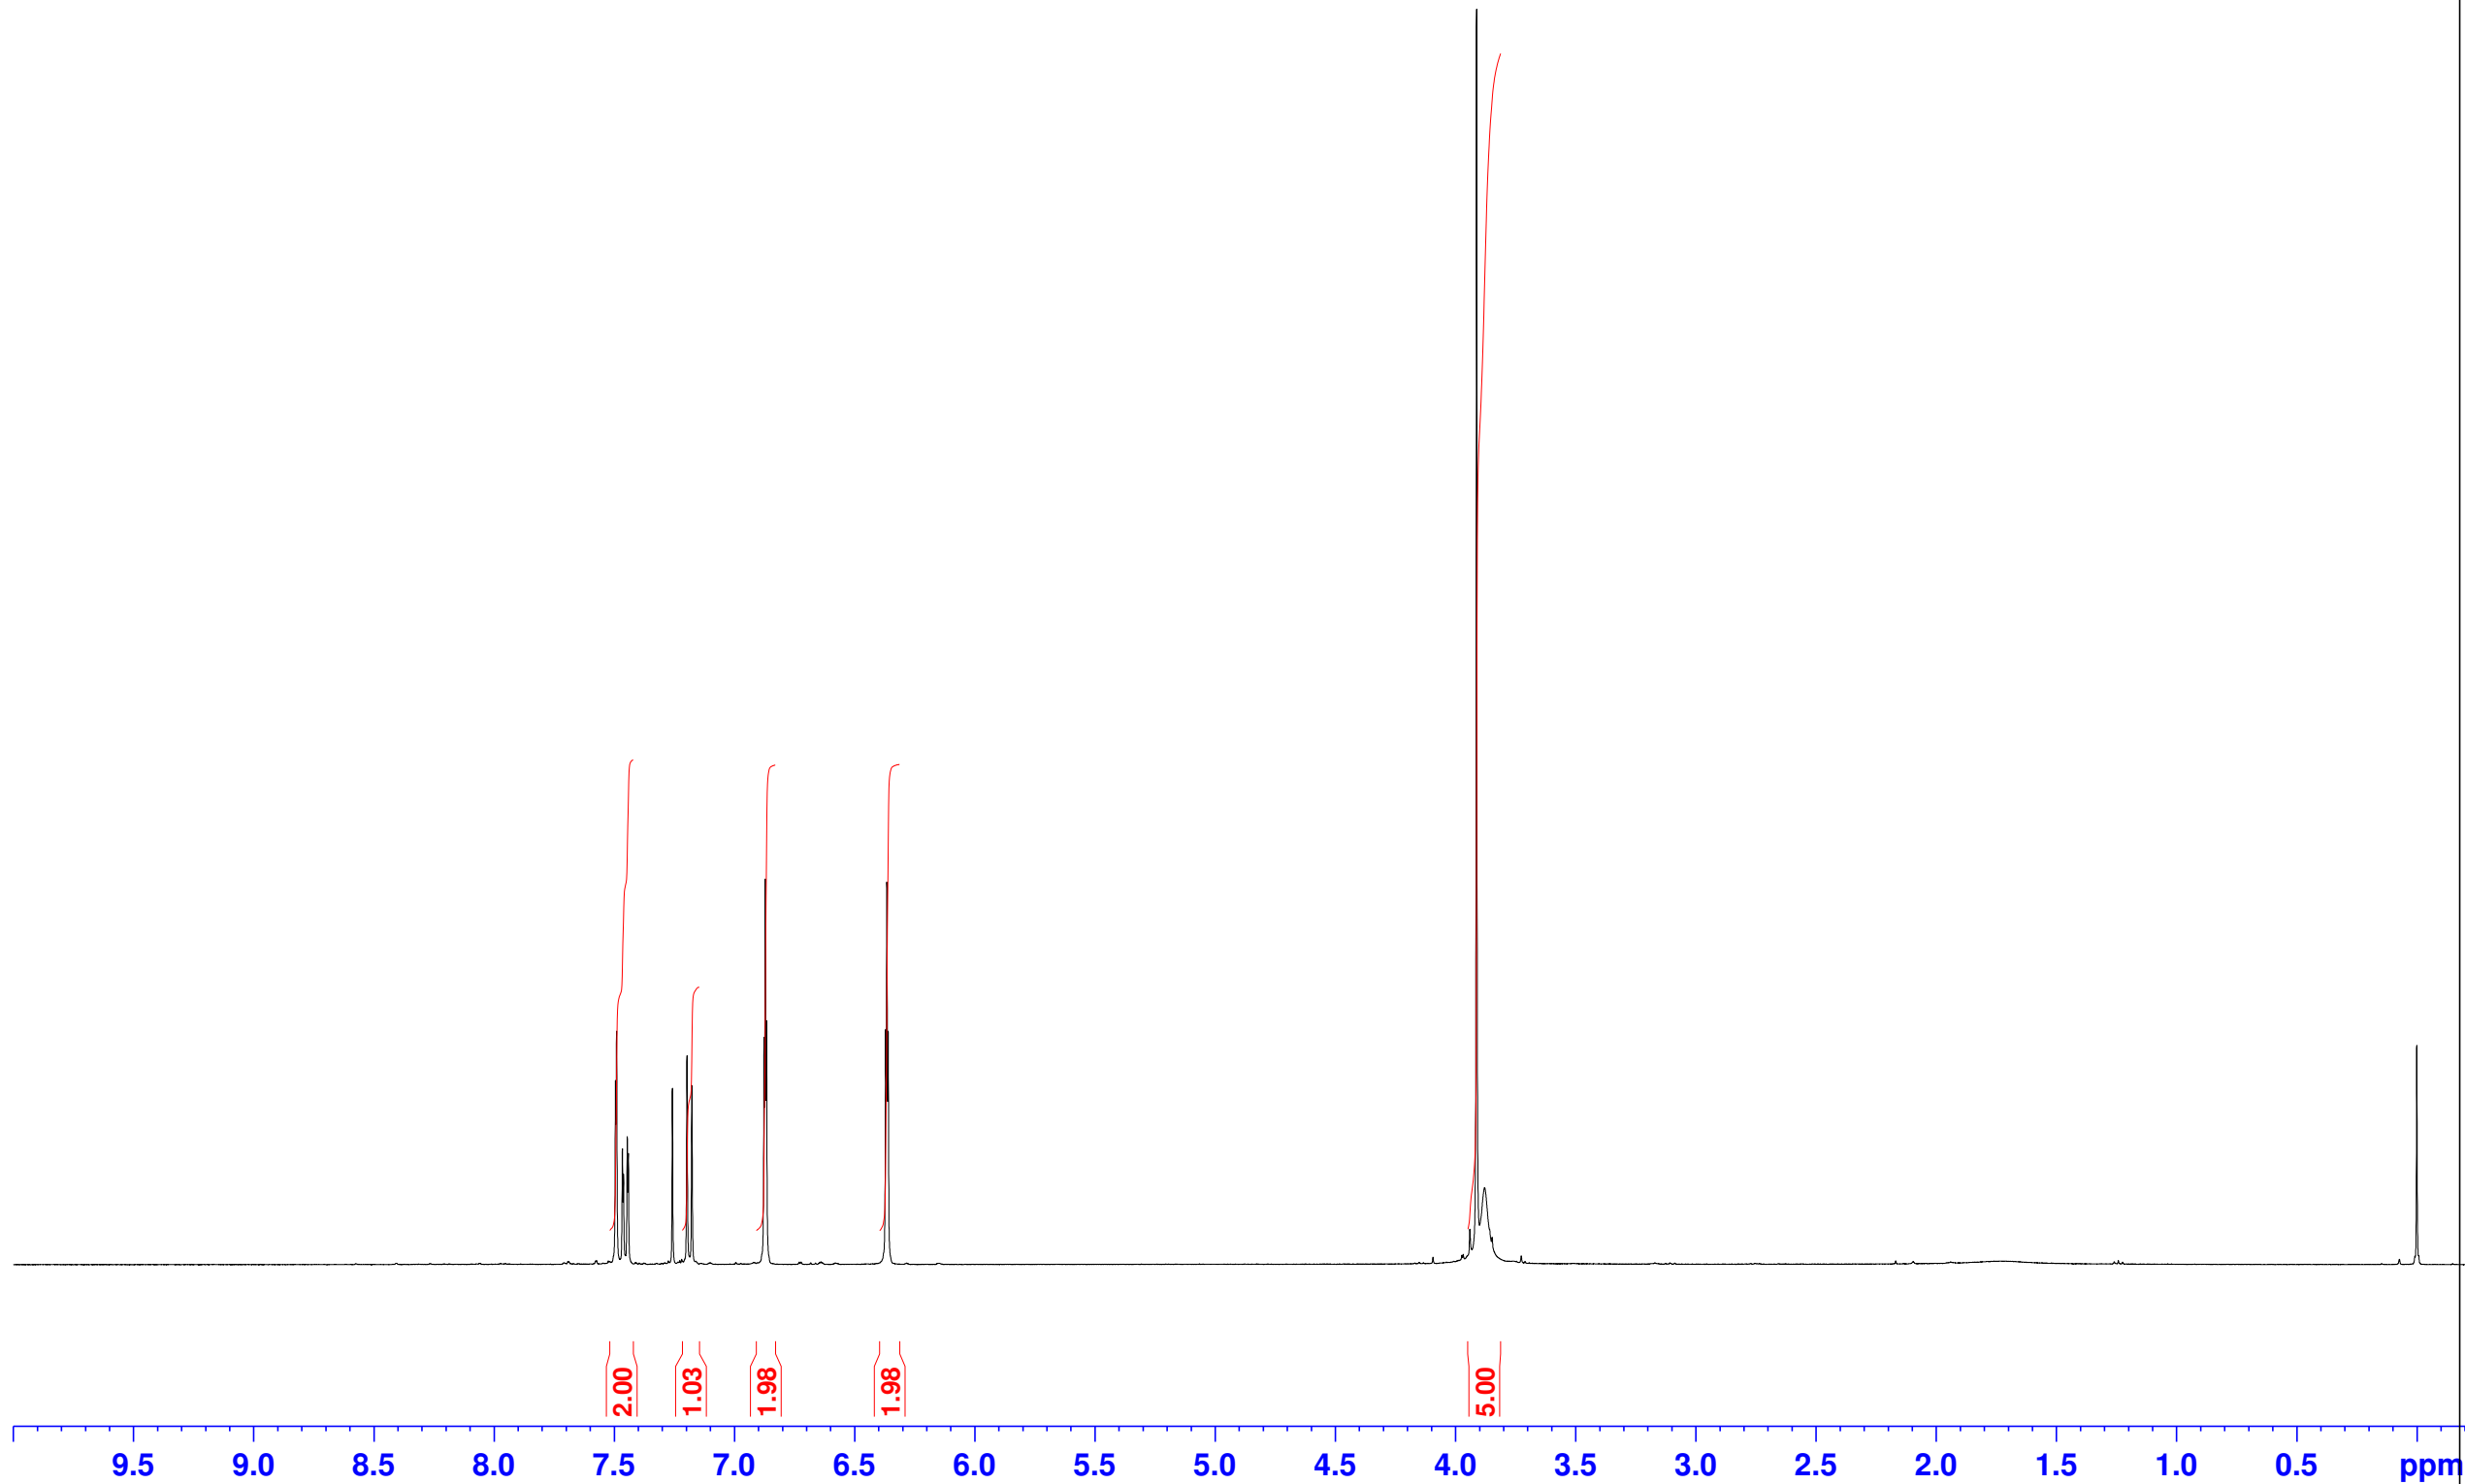

Supplement: supp2 [file elife-53779-supp2-v2.zip]
