# Supplementary material for: Structure-based discovery of potent and selective melatonin receptor agonists
Source: eLife journal article supplement (doi:10.7554/elife.53779), 2020-03-02

MaxPeak: 95.31%  
Ret\_Time: 0.641 min

L693627\$34

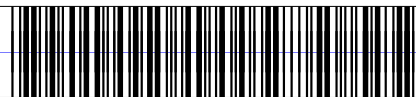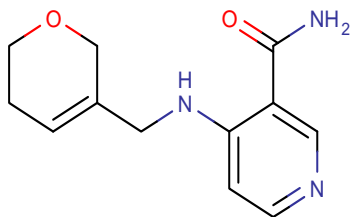

Mol Wt 233.27  
Exact Mass 233.13

| # | Time  | Area% |
|---|-------|-------|
| 1 | 0.641 | 95.31 |
| 2 | 0.965 | 1.22  |
| 3 | 1.074 | 3.47  |

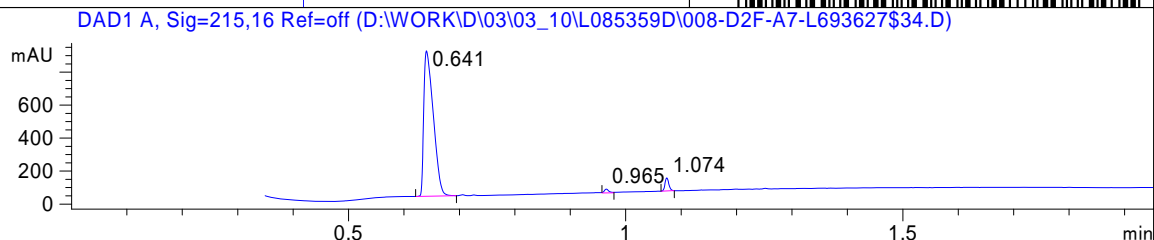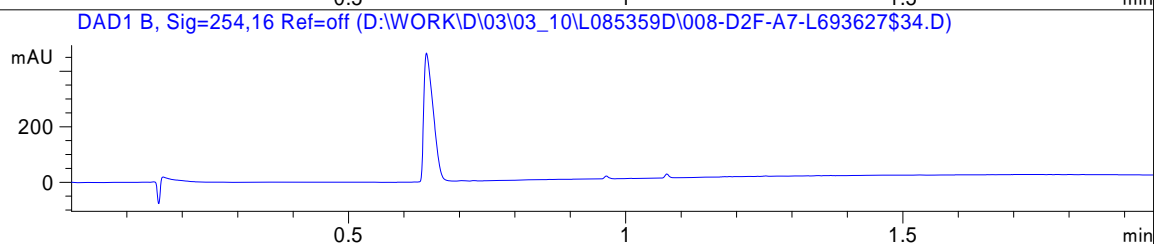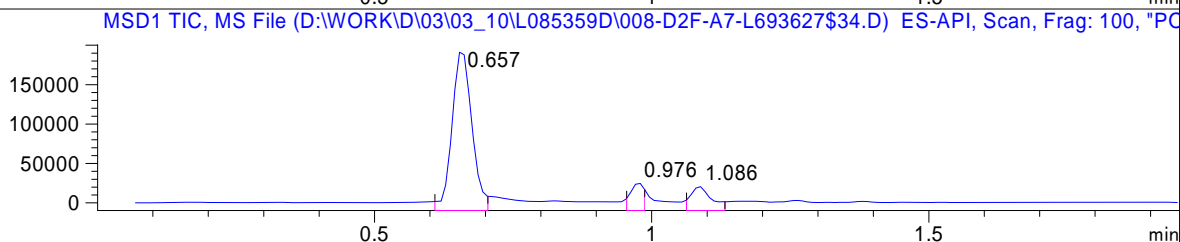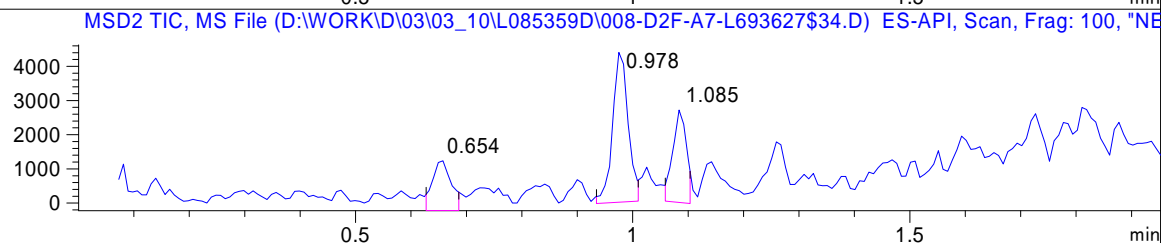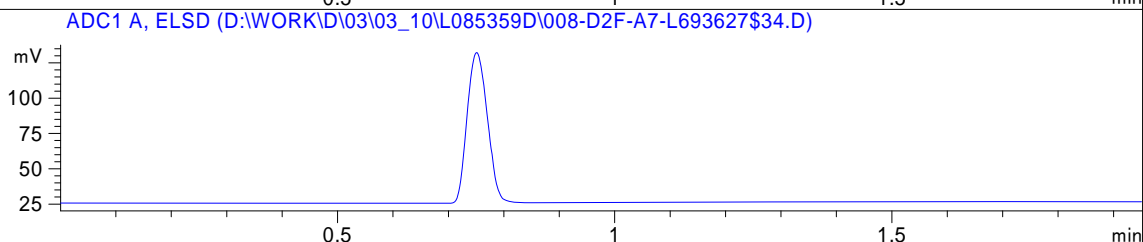

RT 0.657

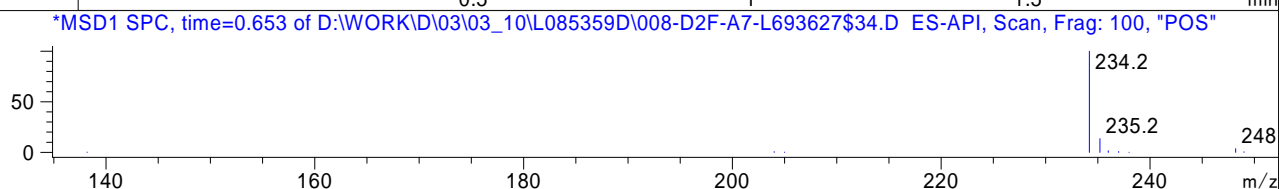

RT 0.976

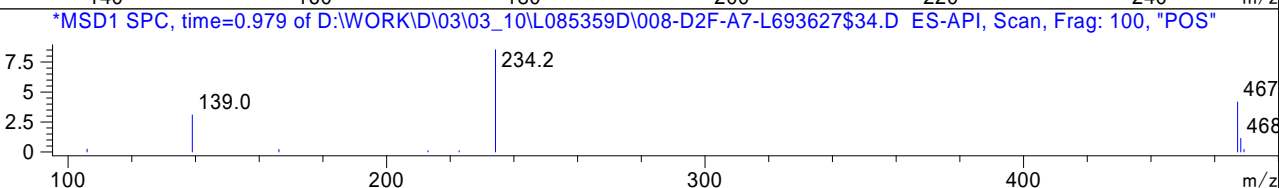

RT 1.086

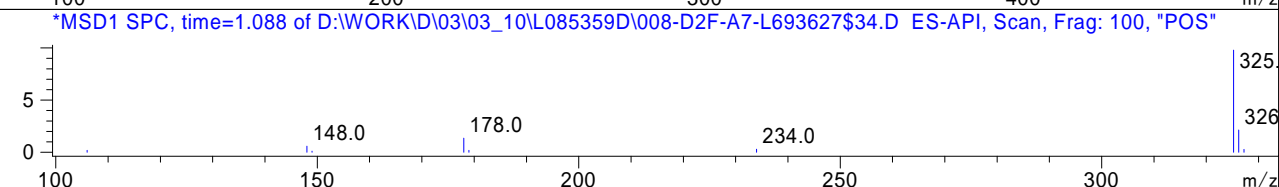

RT 0.654

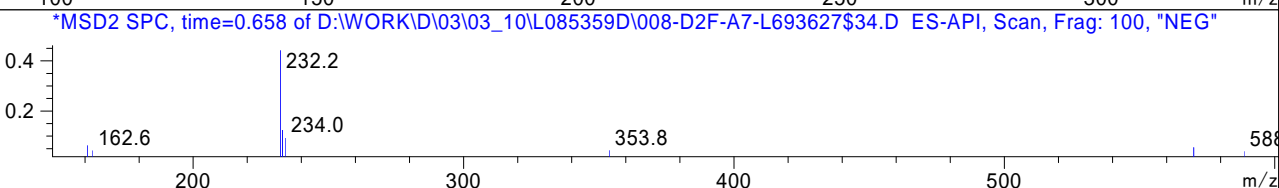

\*MSD2 SPC, time=0.975 of D:\WORK\03\03\_10\L085359D\008-D2F-A7-L693627\$34.D ES-API, Scan, Frag: 100, "NEG"

RT 0.978

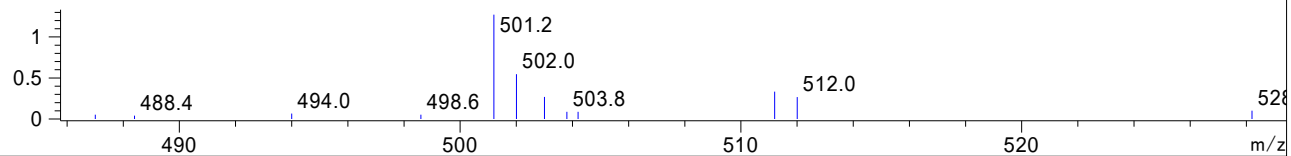

\*MSD2 SPC, time=1.084 of D:\WORK\03\03\_10\L085359D\008-D2F-A7-L693627\$34.D ES-API, Scan, Frag: 100, "NEG"

RT 1.085

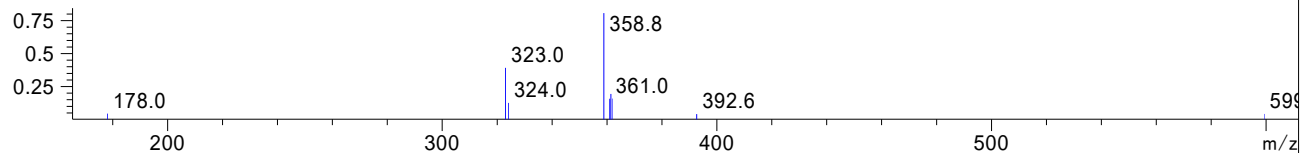

Supplement: supp2 [file elife-53779-supp2-v2.zip]
