# Supplementary material for: Structure-based discovery of potent and selective melatonin receptor agonists
Source: eLife journal article supplement (doi:10.7554/elife.53779), 2020-03-02

MaxPeak: 97.51%  
Ret\_Time: 0.700 min

L693649\$4

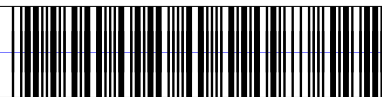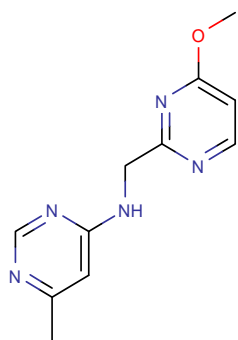

Mol Wt 231.25  
Exact Mass 231.12

| # | Time  | Area% |
|---|-------|-------|
| 1 | 0.700 | 97.51 |
| 2 | 0.986 | 2.49  |

DAD1 A, Sig=215,16 Ref=off (D:\DATE\0305\L084557D\SAMPL000003.D)

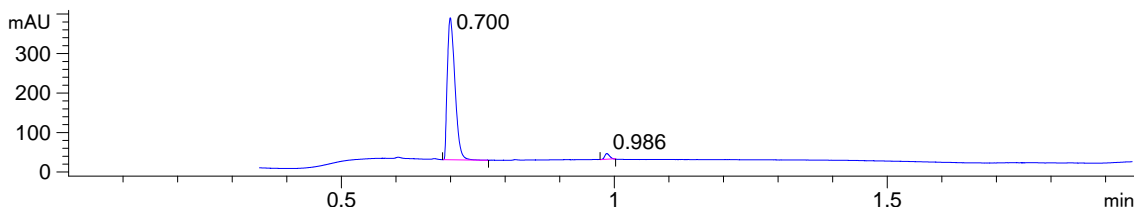

DAD1 B, Sig=254,16 Ref=off (D:\DATE\0305\L084557D\SAMPL000003.D)

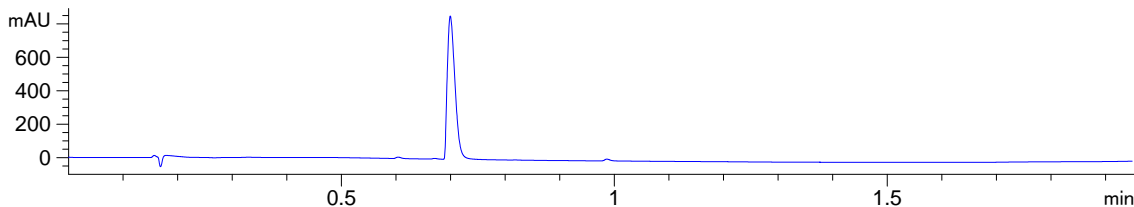

MSD1 TIC, MS File (D:\DATE\0305\L084557D\SAMPL000003.D) ES-API, Scan, Frag: 100, "POS"

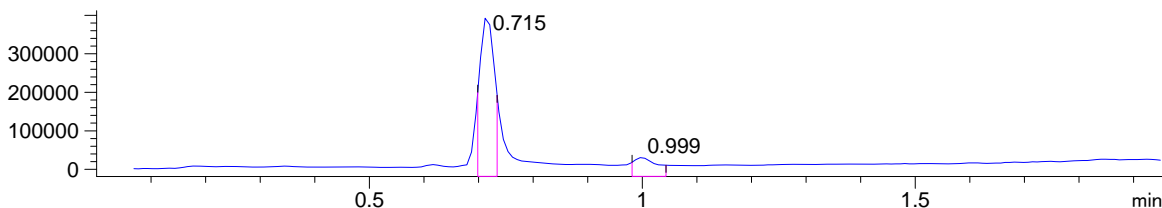

MSD2 TIC, MS File (D:\DATE\0305\L084557D\SAMPL000003.D) ES-API, Scan, Frag: 100, "NEG"

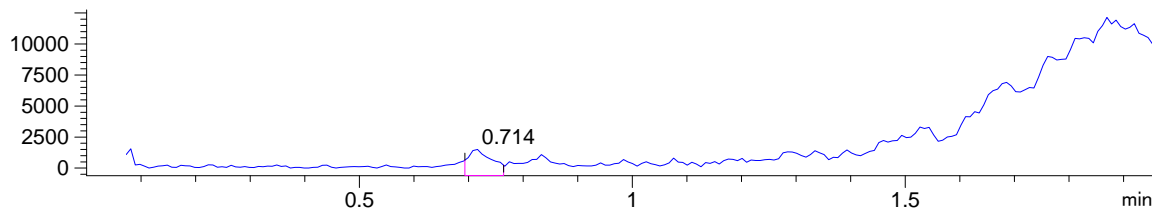

ADC1 A, ELSD (D:\DATE\0305\L084557D\SAMPL000003.D)

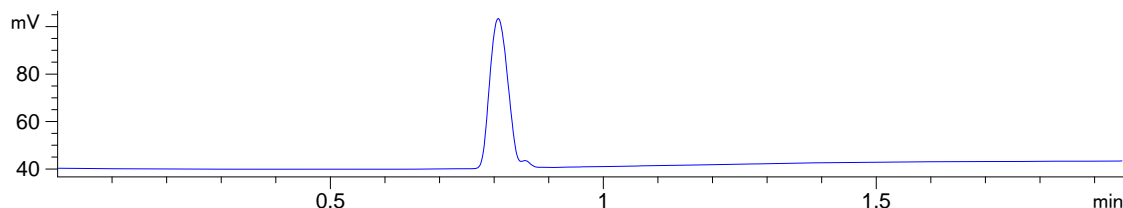

RT 0.715

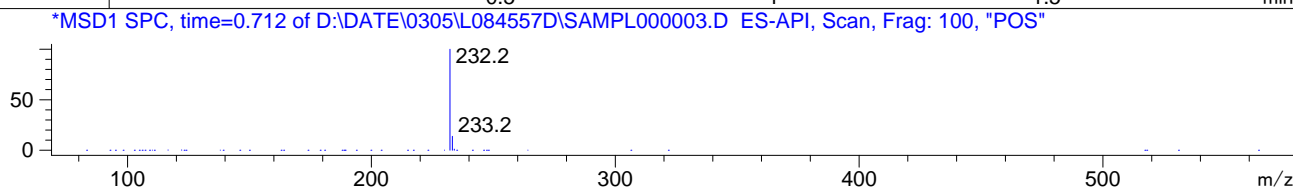

RT 0.999

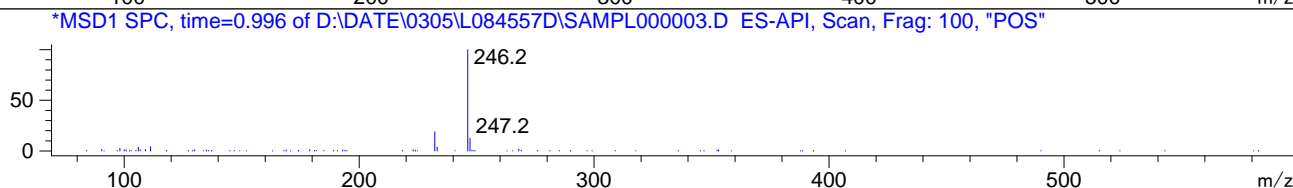

RT 0.714

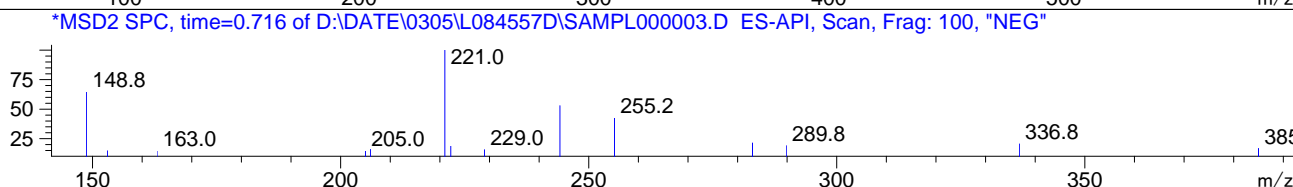

Supplement: supp2 [file elife-53779-supp2-v2.zip]
