# Supplementary material for: Structure-based discovery of potent and selective melatonin receptor agonists
Source: eLife journal article supplement (doi:10.7554/elife.53779), 2020-03-02

MaxPeak: 100.00%  
Ret\_Time: 0.964 min

L693616\$4

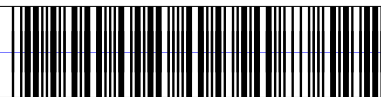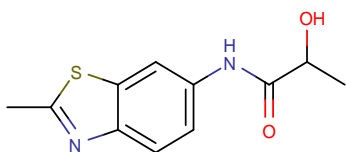

Mol Wt 236.29  
Exact Mass 236.07

| # | Time  | Area%  |
|---|-------|--------|
| 1 | 0.964 | 100.00 |

DAD1 A, Sig=215,16 Ref=off (D:\DATE\0305\L084557D\SAMPL000011.D)

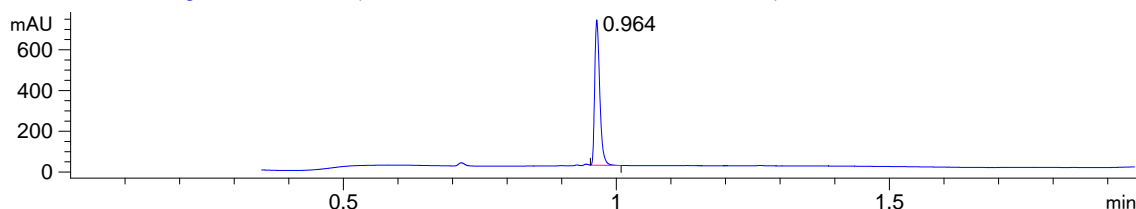

DAD1 B, Sig=254,16 Ref=off (D:\DATE\0305\L084557D\SAMPL000011.D)

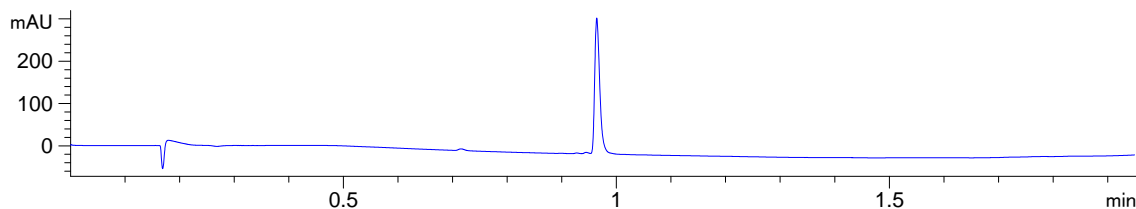

MSD1 TIC, MS File (D:\DATE\0305\L084557D\SAMPL000011.D) ES-API, Scan, Frag: 100, "POS"

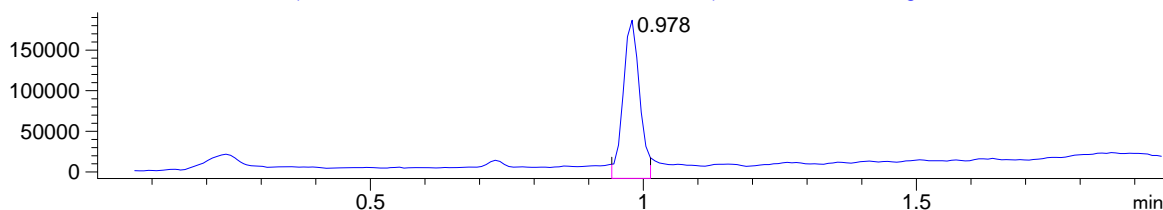

MSD2 TIC, MS File (D:\DATE\0305\L084557D\SAMPL000011.D) ES-API, Scan, Frag: 100, "NEG"

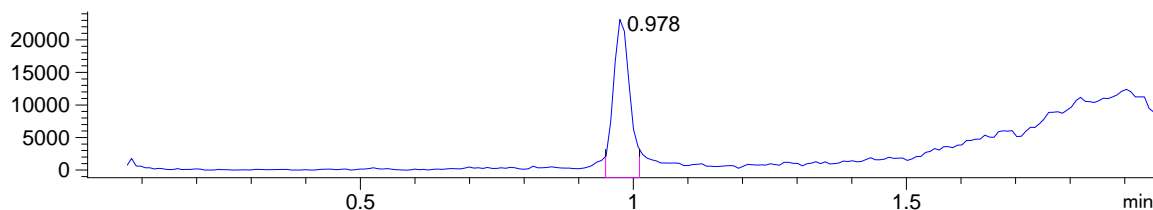

ADC1 A, ELSD (D:\DATE\0305\L084557D\SAMPL000011.D)

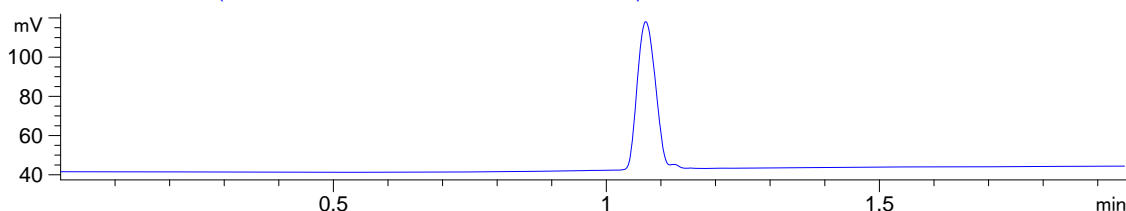

RT 0.978

\*MSD1 SPC, time=0.979 of D:\DATE\0305\L084557D\SAMPL000011.D ES-API, Scan, Frag: 100, "POS"

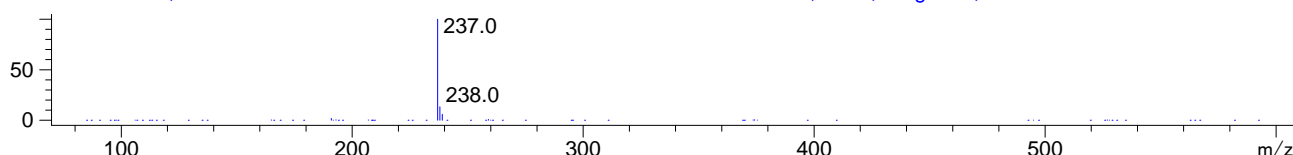

RT 0.978

\*MSD2 SPC, time=0.975 of D:\DATE\0305\L084557D\SAMPL000011.D ES-API, Scan, Frag: 100, "NEG"

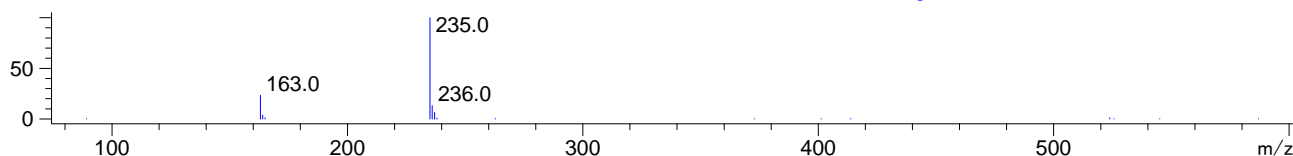

Supplement: supp2 [file elife-53779-supp2-v2.zip]
