# Supplementary figures and images for: Structure-based discovery of potent and selective melatonin receptor agonists
Source: eLife journal article supplement (doi:10.7554/elife.53779), 2020-03-02

MaxPeak: 100.00%  
Ret\_Time: 0.966 min

L693647\$1



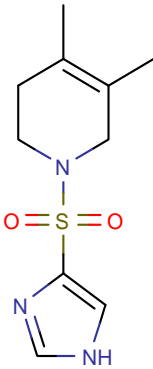

Mol Wt 241.31  
Exact Mass 241.1

| # | Time  | Area%  |
|---|-------|--------|
| 1 | 0.966 | 100.00 |

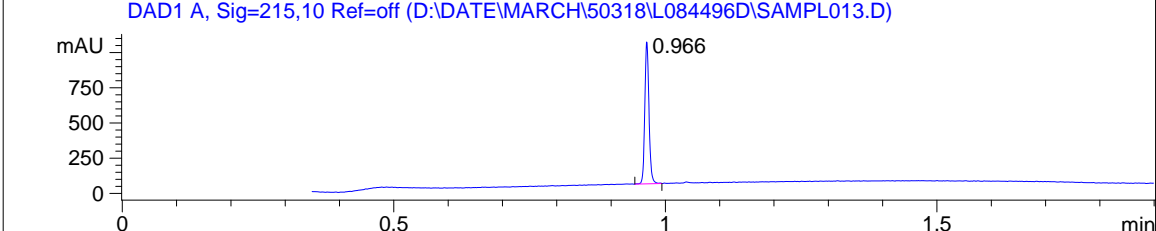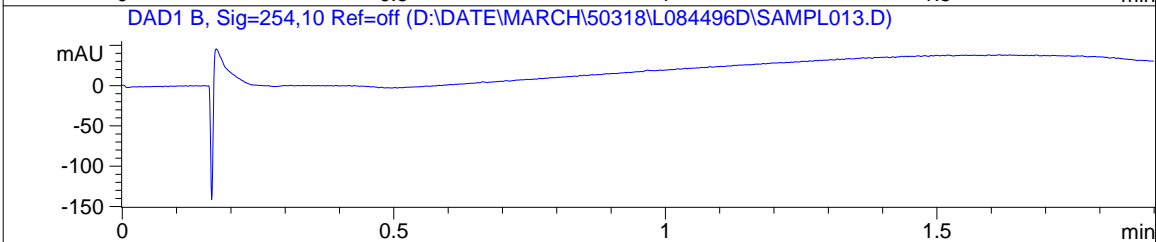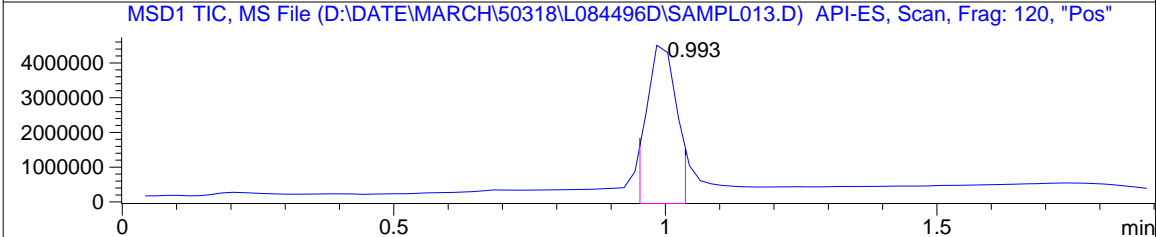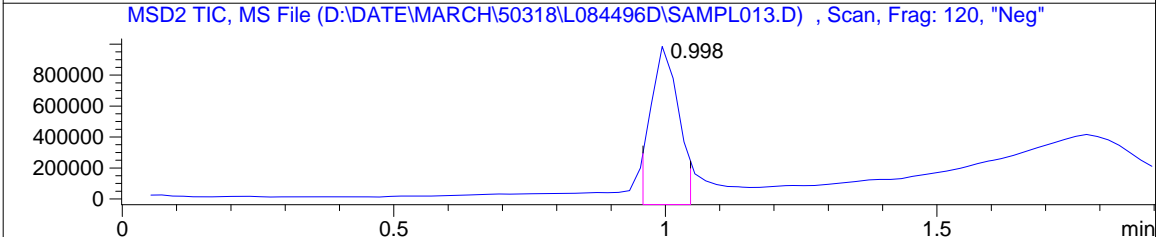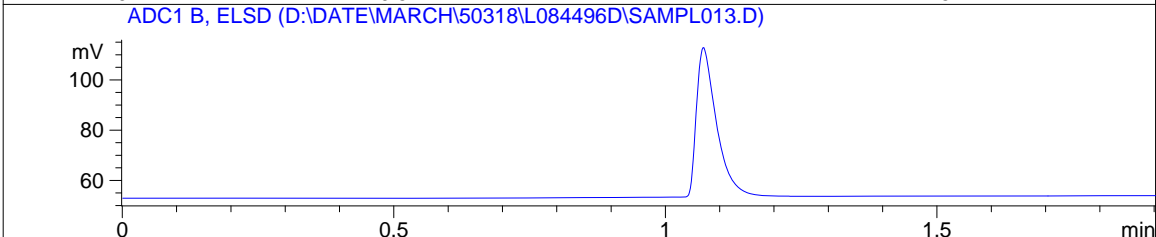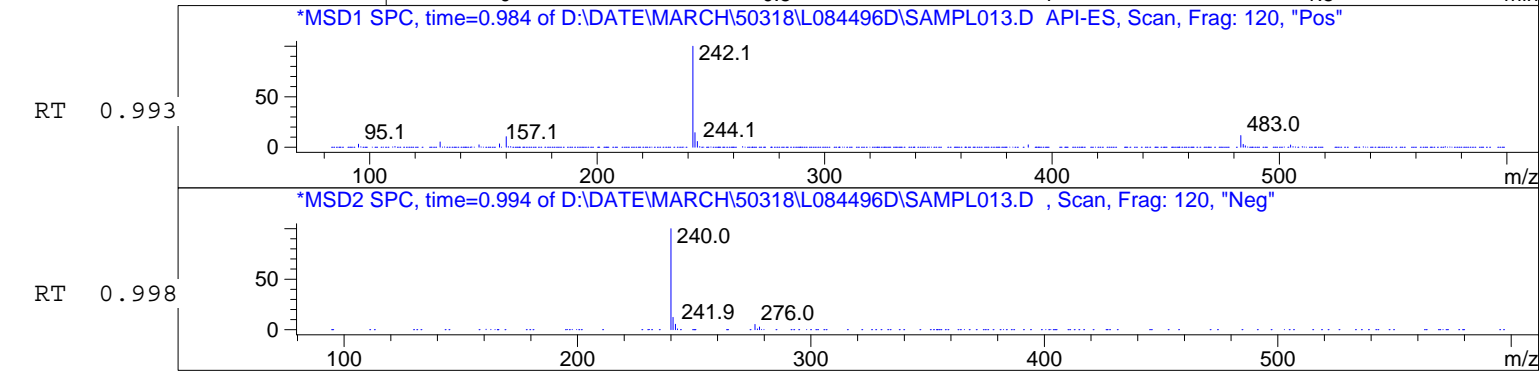

Supplement: supp2 [file elife-53779-supp2-v2.zip]

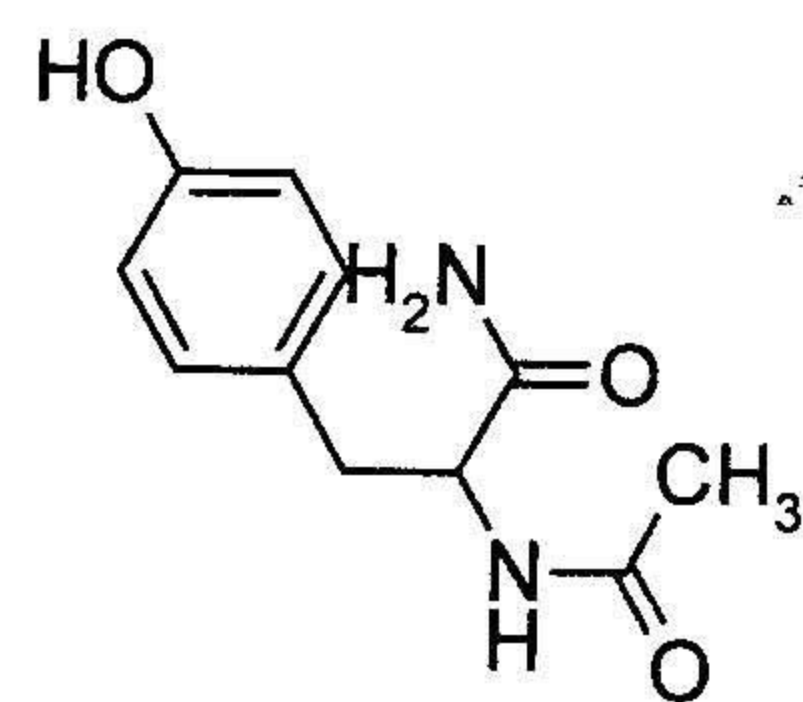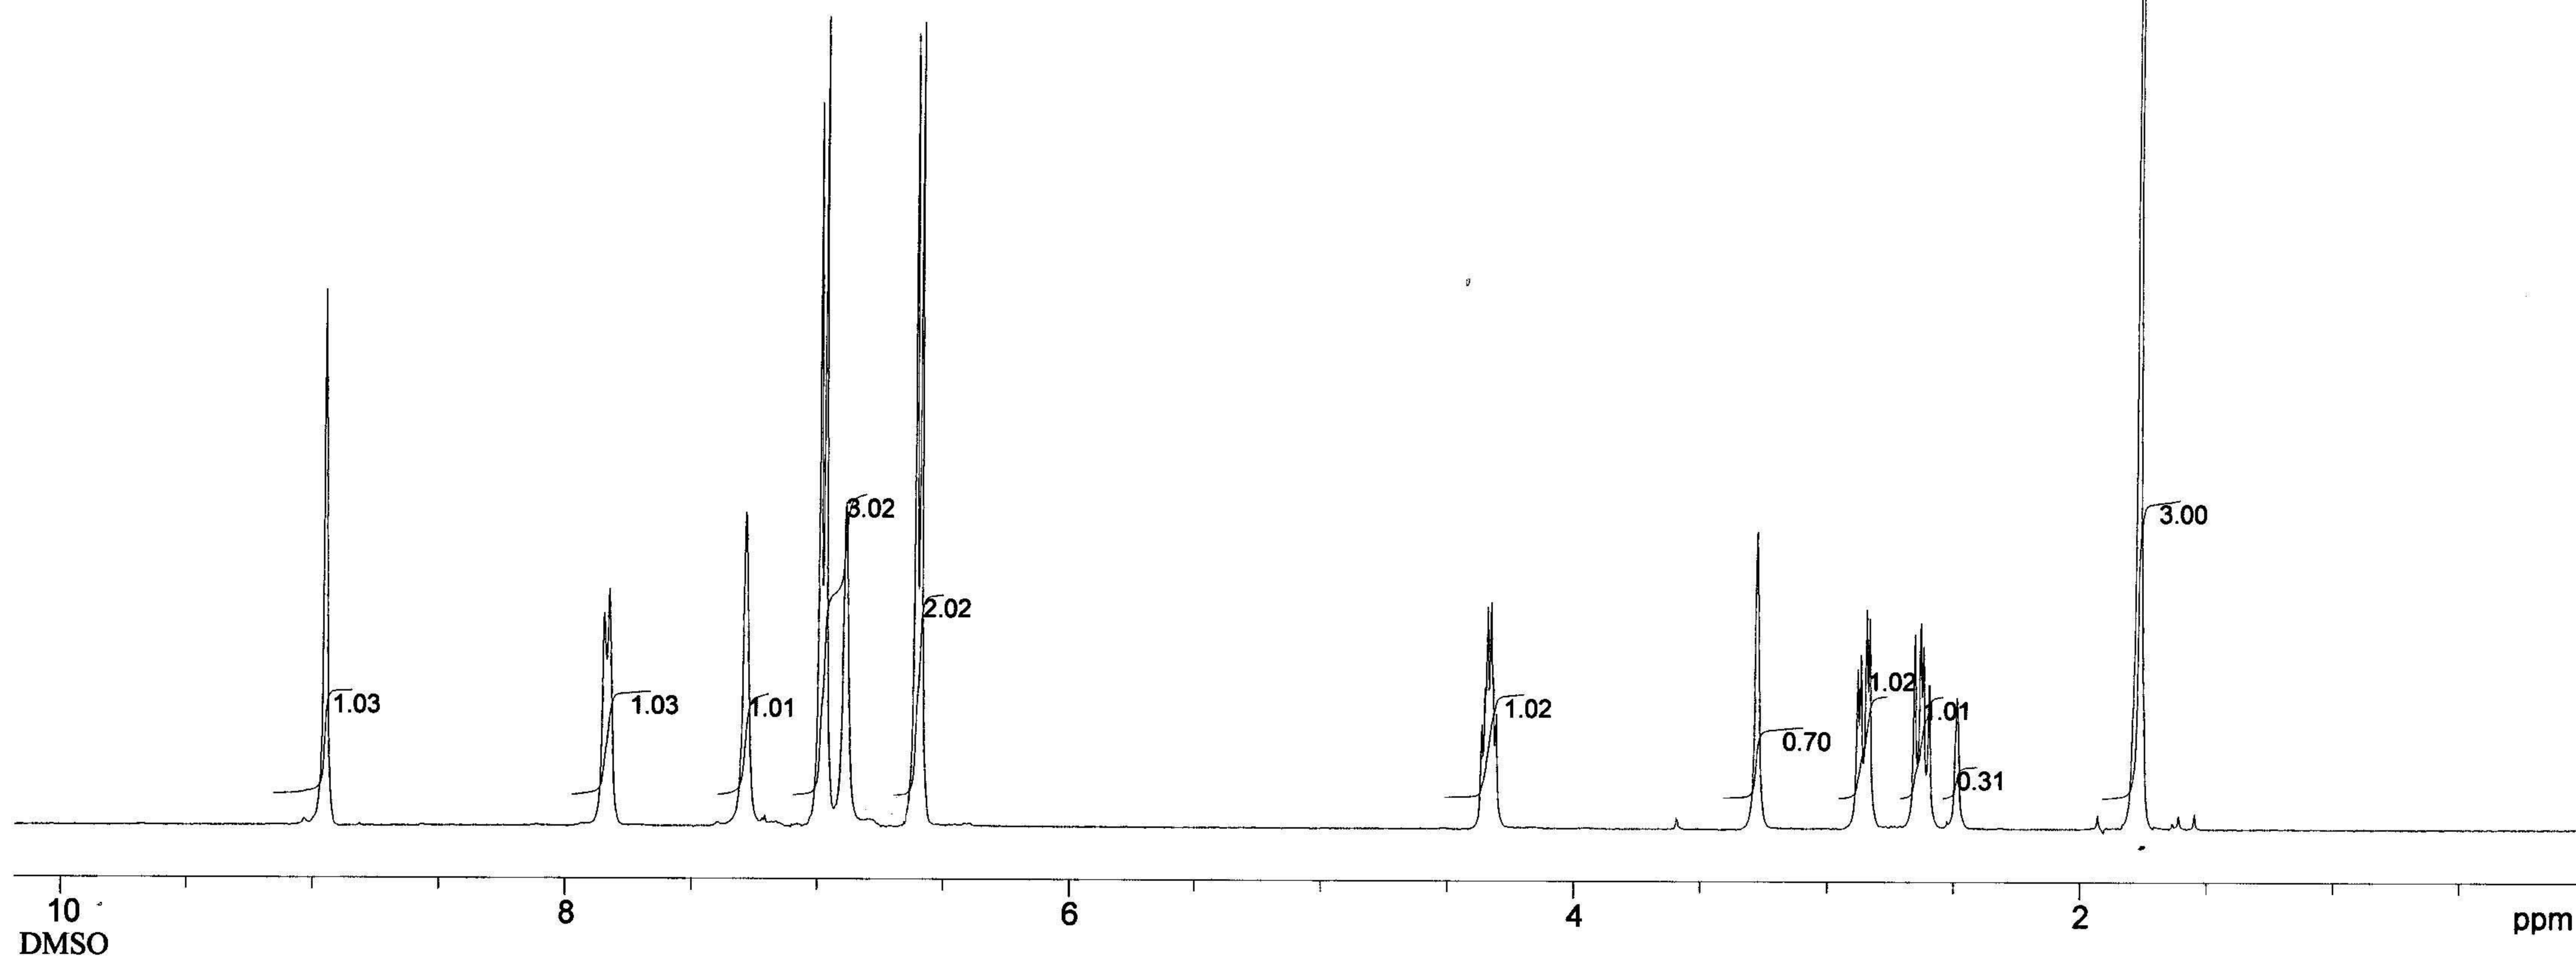

Supplement: supp2 [file elife-53779-supp2-v2.zip]

Bruker DRX-500, SF=500.13 MHz, 05-09-2019 Base: BBB7074-7

SDS01718 in DMSO-d<sub>6</sub>/CCl<sub>4</sub>

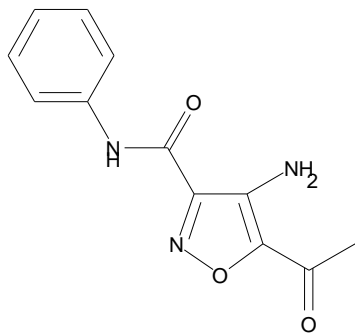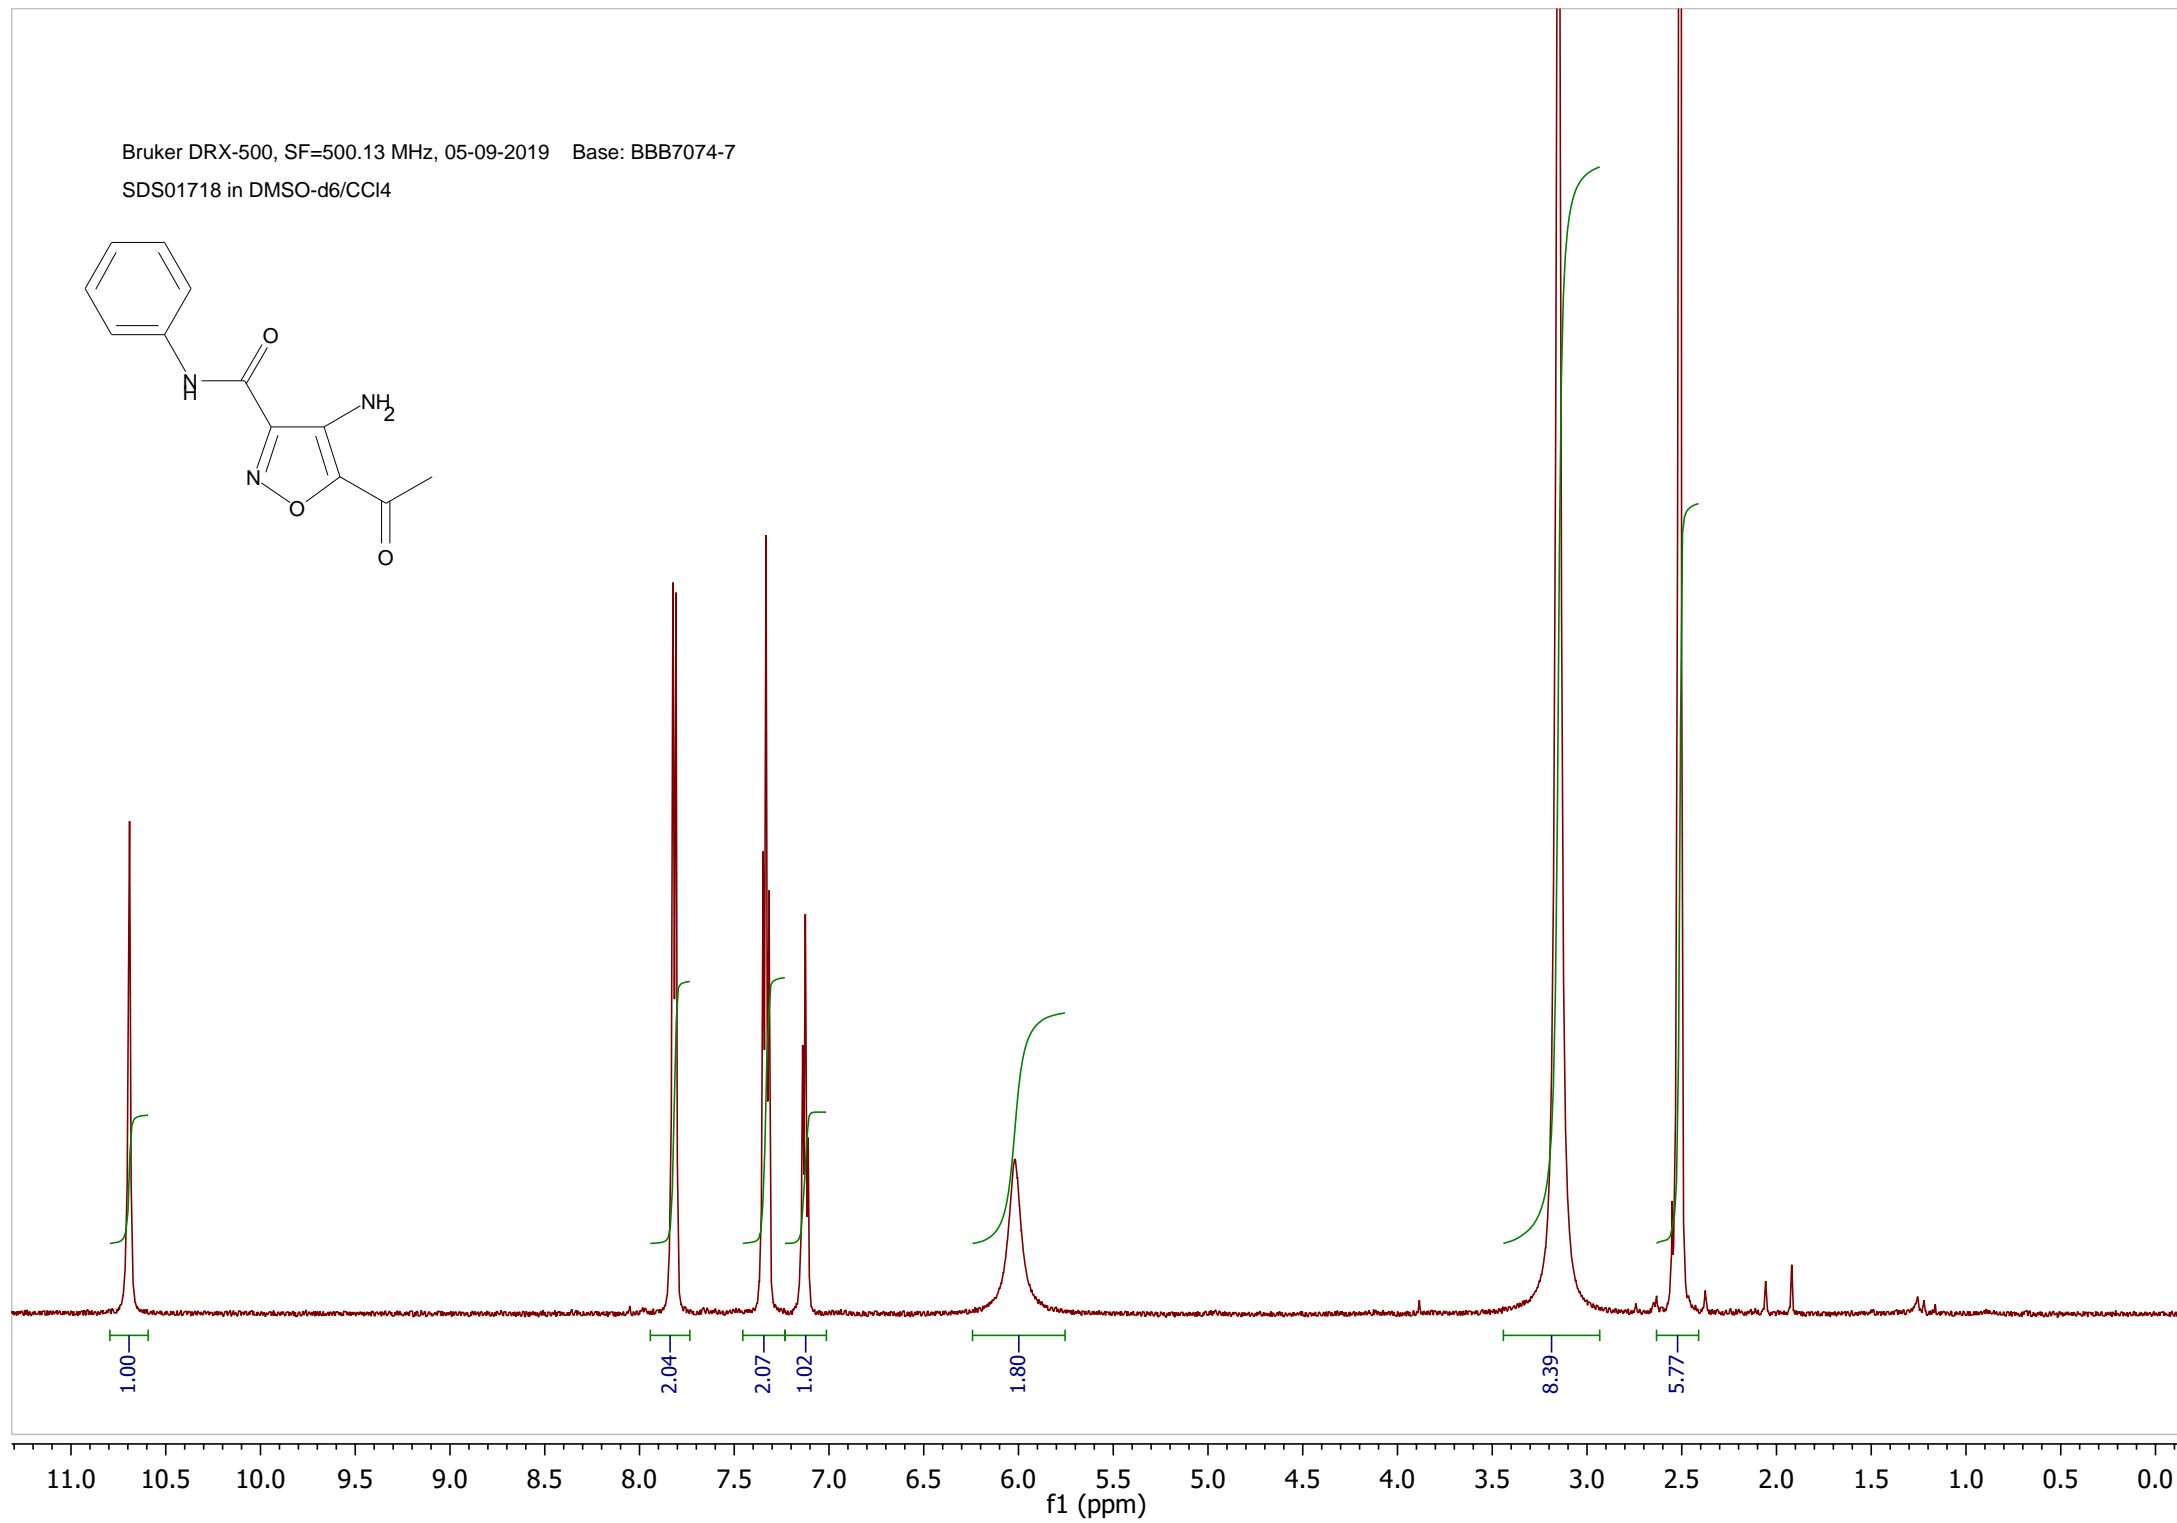

Supplement: supp2 [file elife-53779-supp2-v2.zip]

L693642\$15

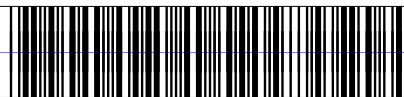

MaxPeak: 91.53%  
Ret\_Time: 1.091 min

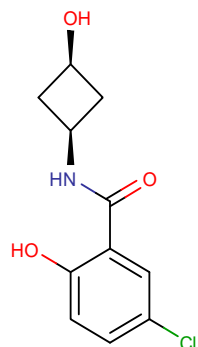

Mol Wt 241.67  
Exact Mass 241.06

| # | Time  | Area% |
|---|-------|-------|
| 1 | 0.737 | 4.52  |
| 2 | 0.867 | 1.48  |
| 3 | 0.937 | 2.47  |
| 4 | 1.091 | 91.53 |

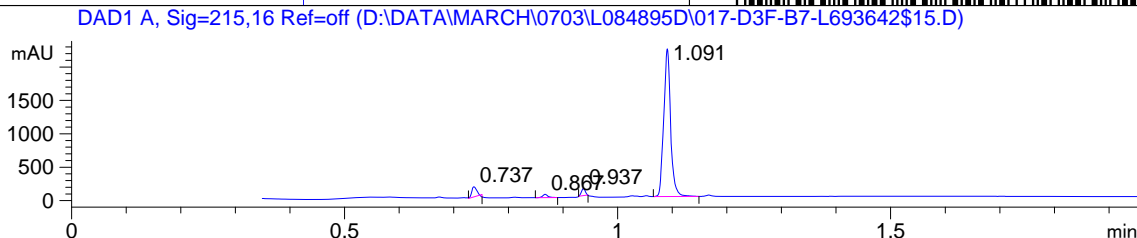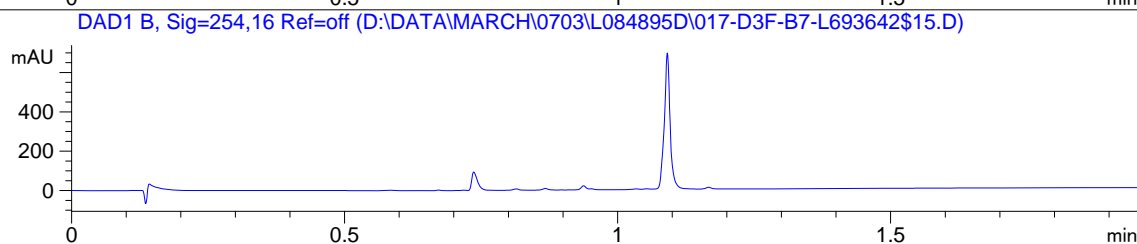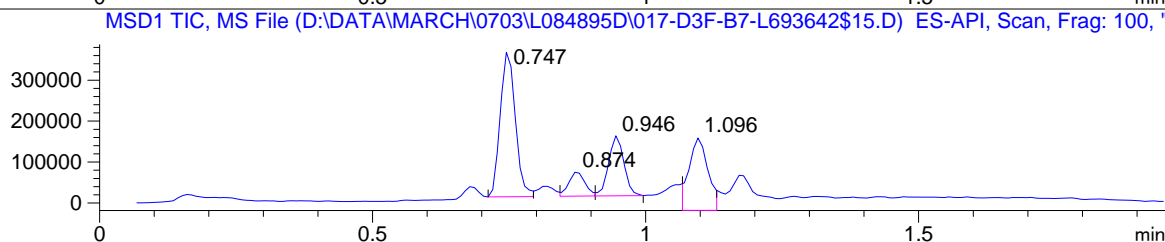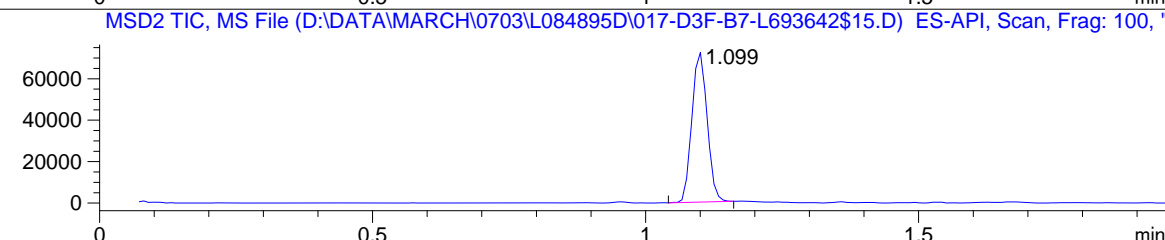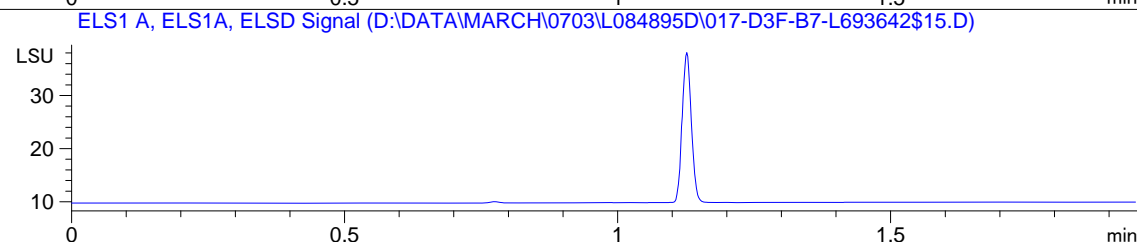

RT 0.747

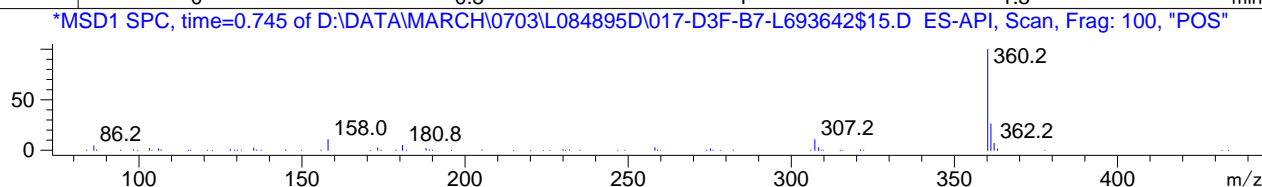

RT 0.874

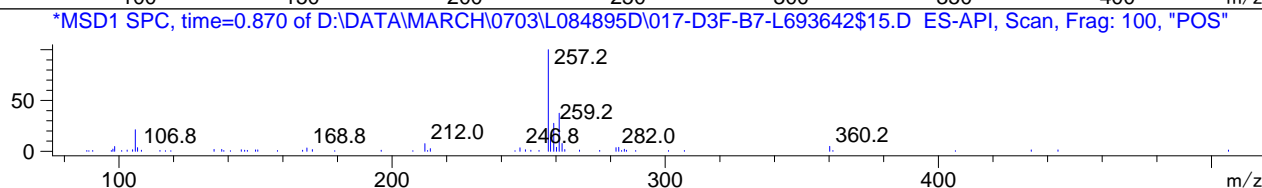

RT 0.946

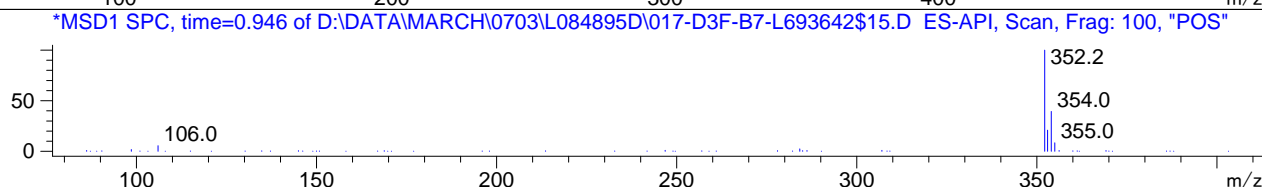

RT 1.096

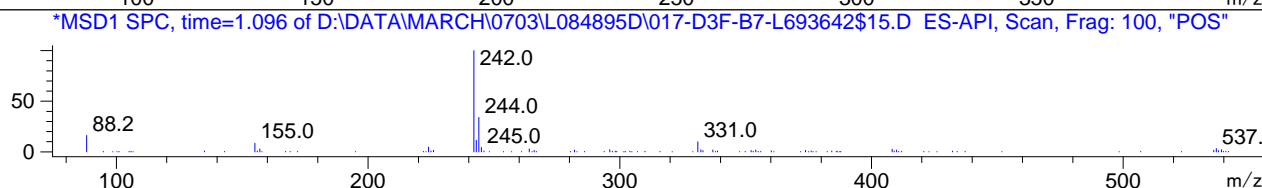

RT 1.099

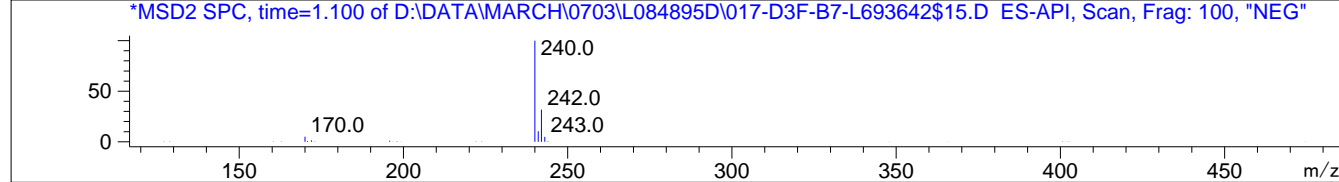

Supplement: supp2 [file elife-53779-supp2-v2.zip]

MaxPeak: 96.10%  
Ret\_Time: 0.636 min

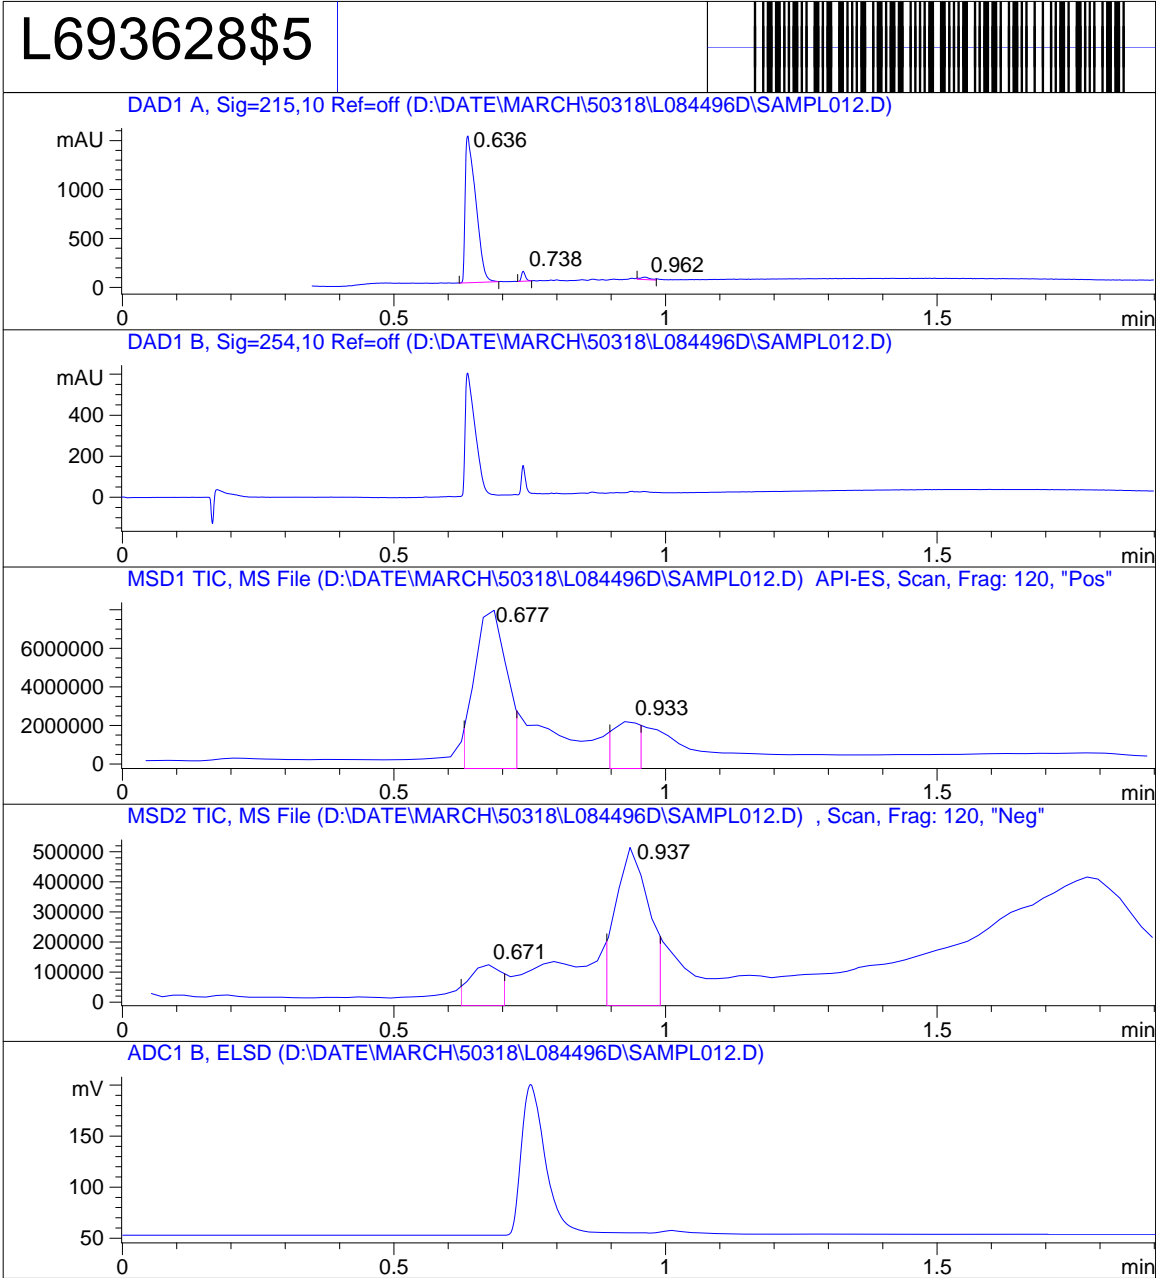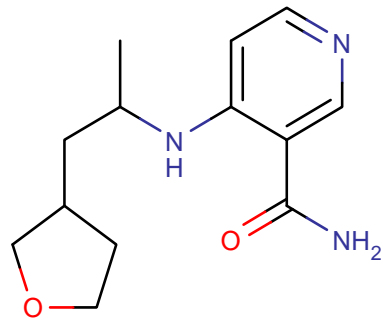

Mol Wt 249.31  
Exact Mass 249.17

| # | Time  | Area% |
|---|-------|-------|
| 1 | 0.636 | 96.10 |
| 2 | 0.738 | 2.41  |
| 3 | 0.962 | 1.49  |

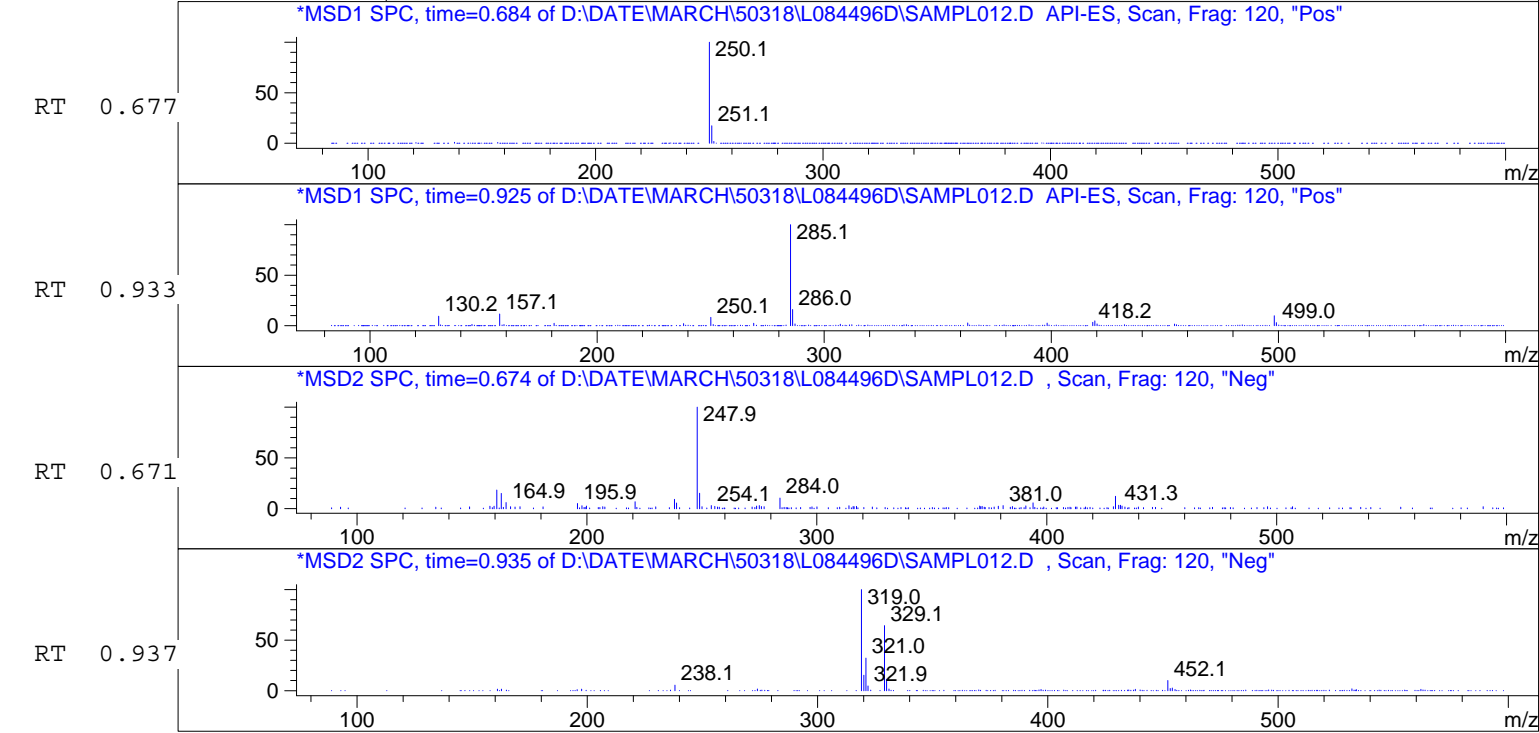

Supplement: supp2 [file elife-53779-supp2-v2.zip]

MaxPeak: 98.91%  
Ret\_Time: 0.602 min

L693629\$4

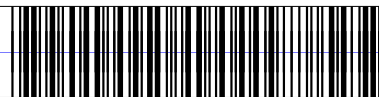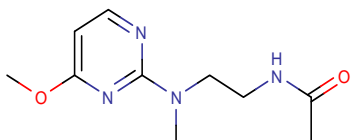

Mol Wt 224.26  
Exact Mass 224.14

| # | Time  | Area% |
|---|-------|-------|
| 1 | 0.602 | 98.91 |
| 2 | 0.945 | 1.09  |

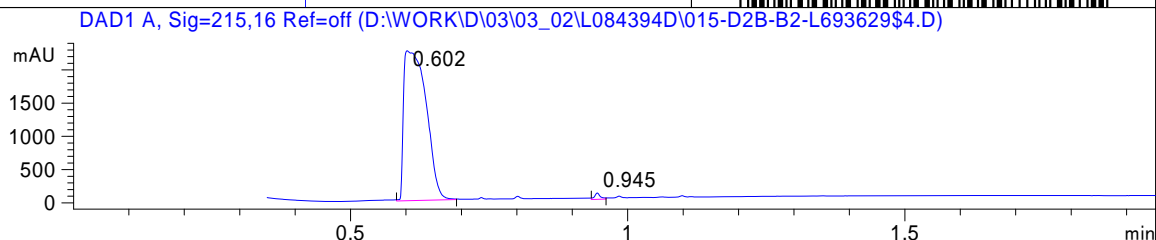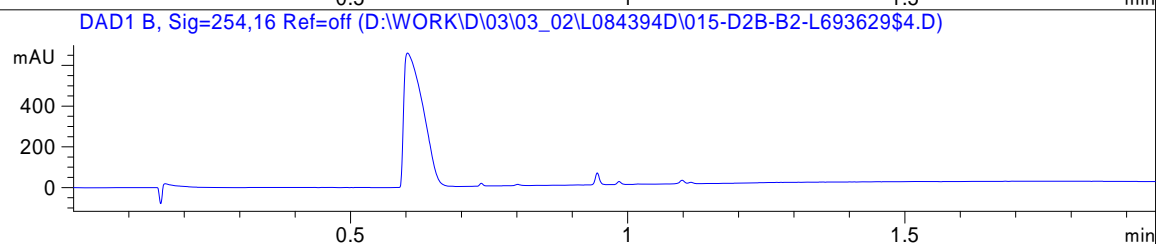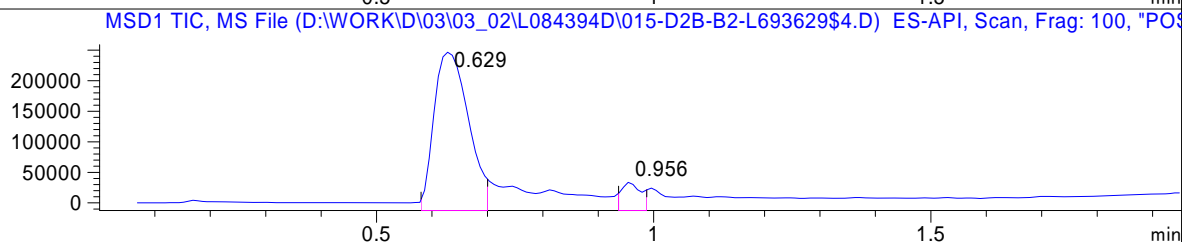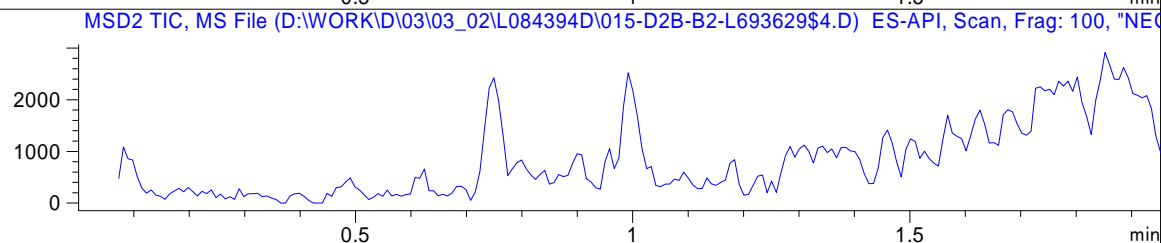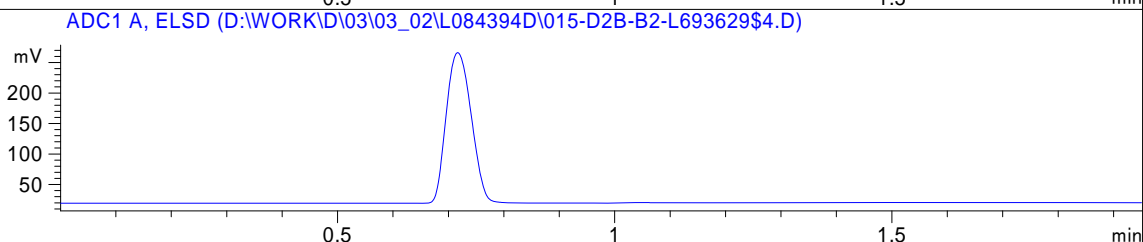

RT 0.629

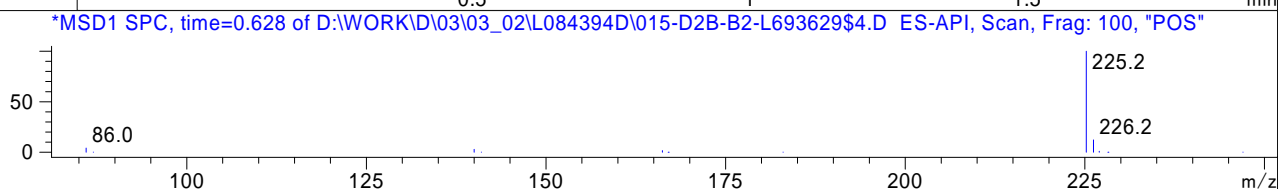

RT 0.956

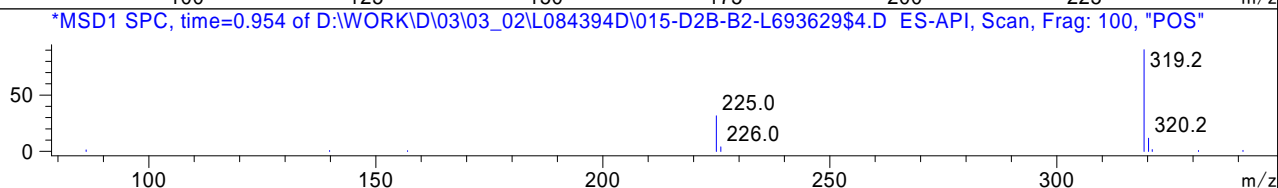

Supplement: supp2 [file elife-53779-supp2-v2.zip]

L693622\$1

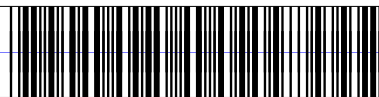

MaxPeak: 96.70%  
Ret\_Time: 0.610 min

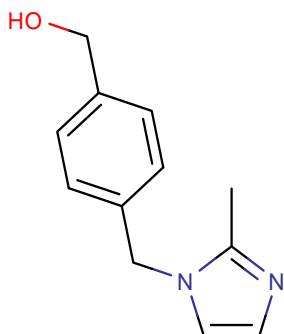

Mol Wt 202.25  
Exact Mass 202.13

| # | Time  | Area% |
|---|-------|-------|
| 1 | 0.610 | 96.70 |
| 2 | 0.791 | 1.98  |
| 3 | 0.893 | 1.32  |

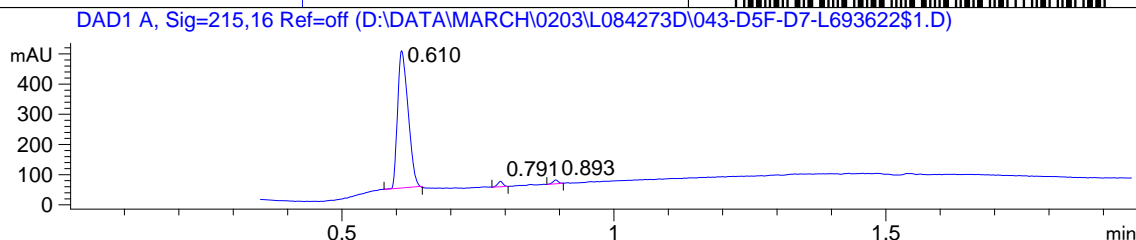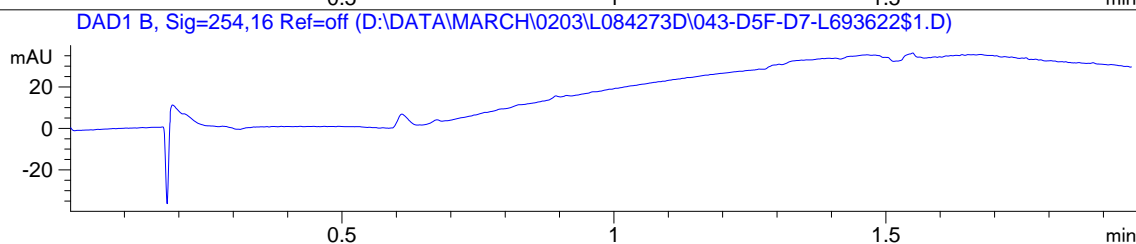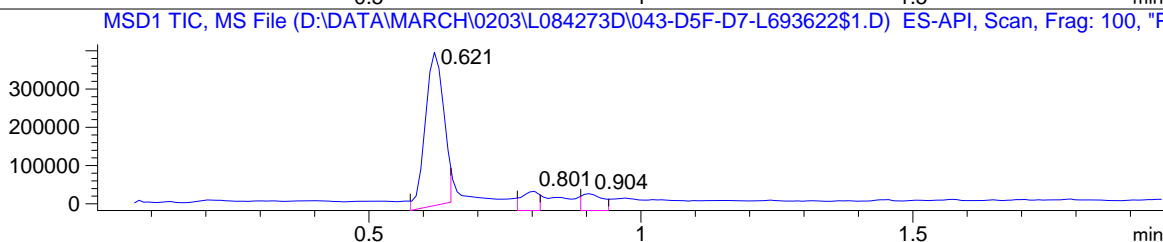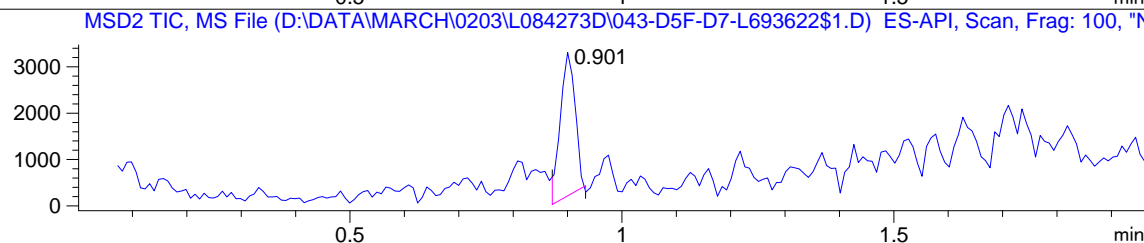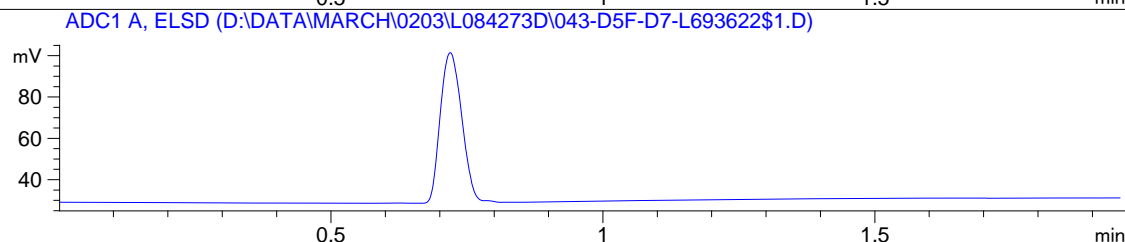

RT 0.621

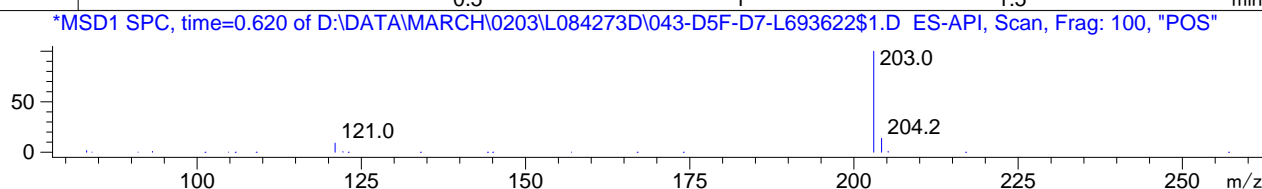

RT 0.801

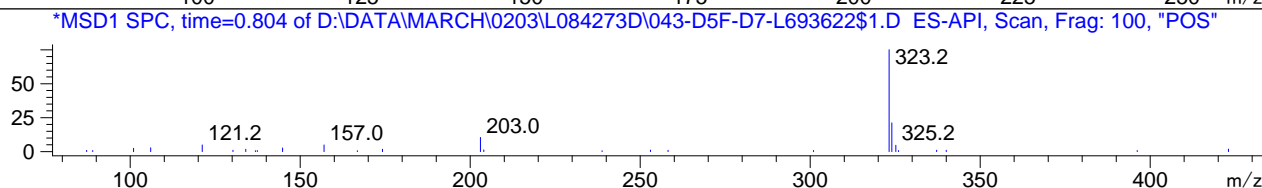

RT 0.904

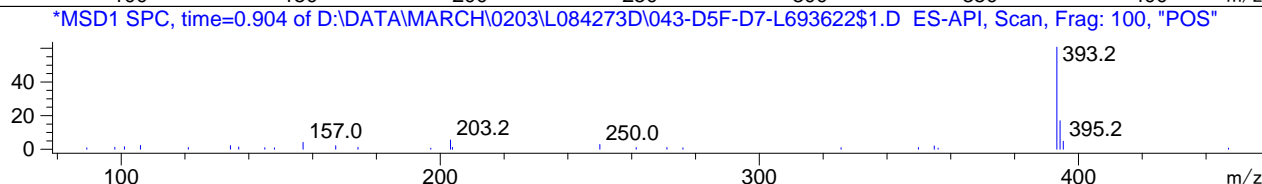

RT 0.901

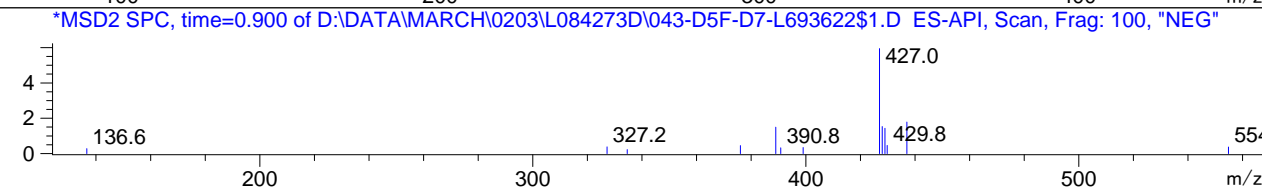

Supplement: supp2 [file elife-53779-supp2-v2.zip]

Bruker DRX-500, SF=500.13 MHz, 05-09-2019 Base: BBB7074-7

SDR57038 in DMSO-d6/CCl4

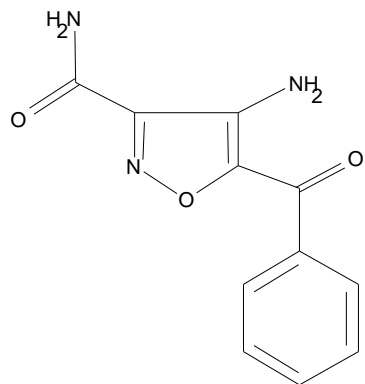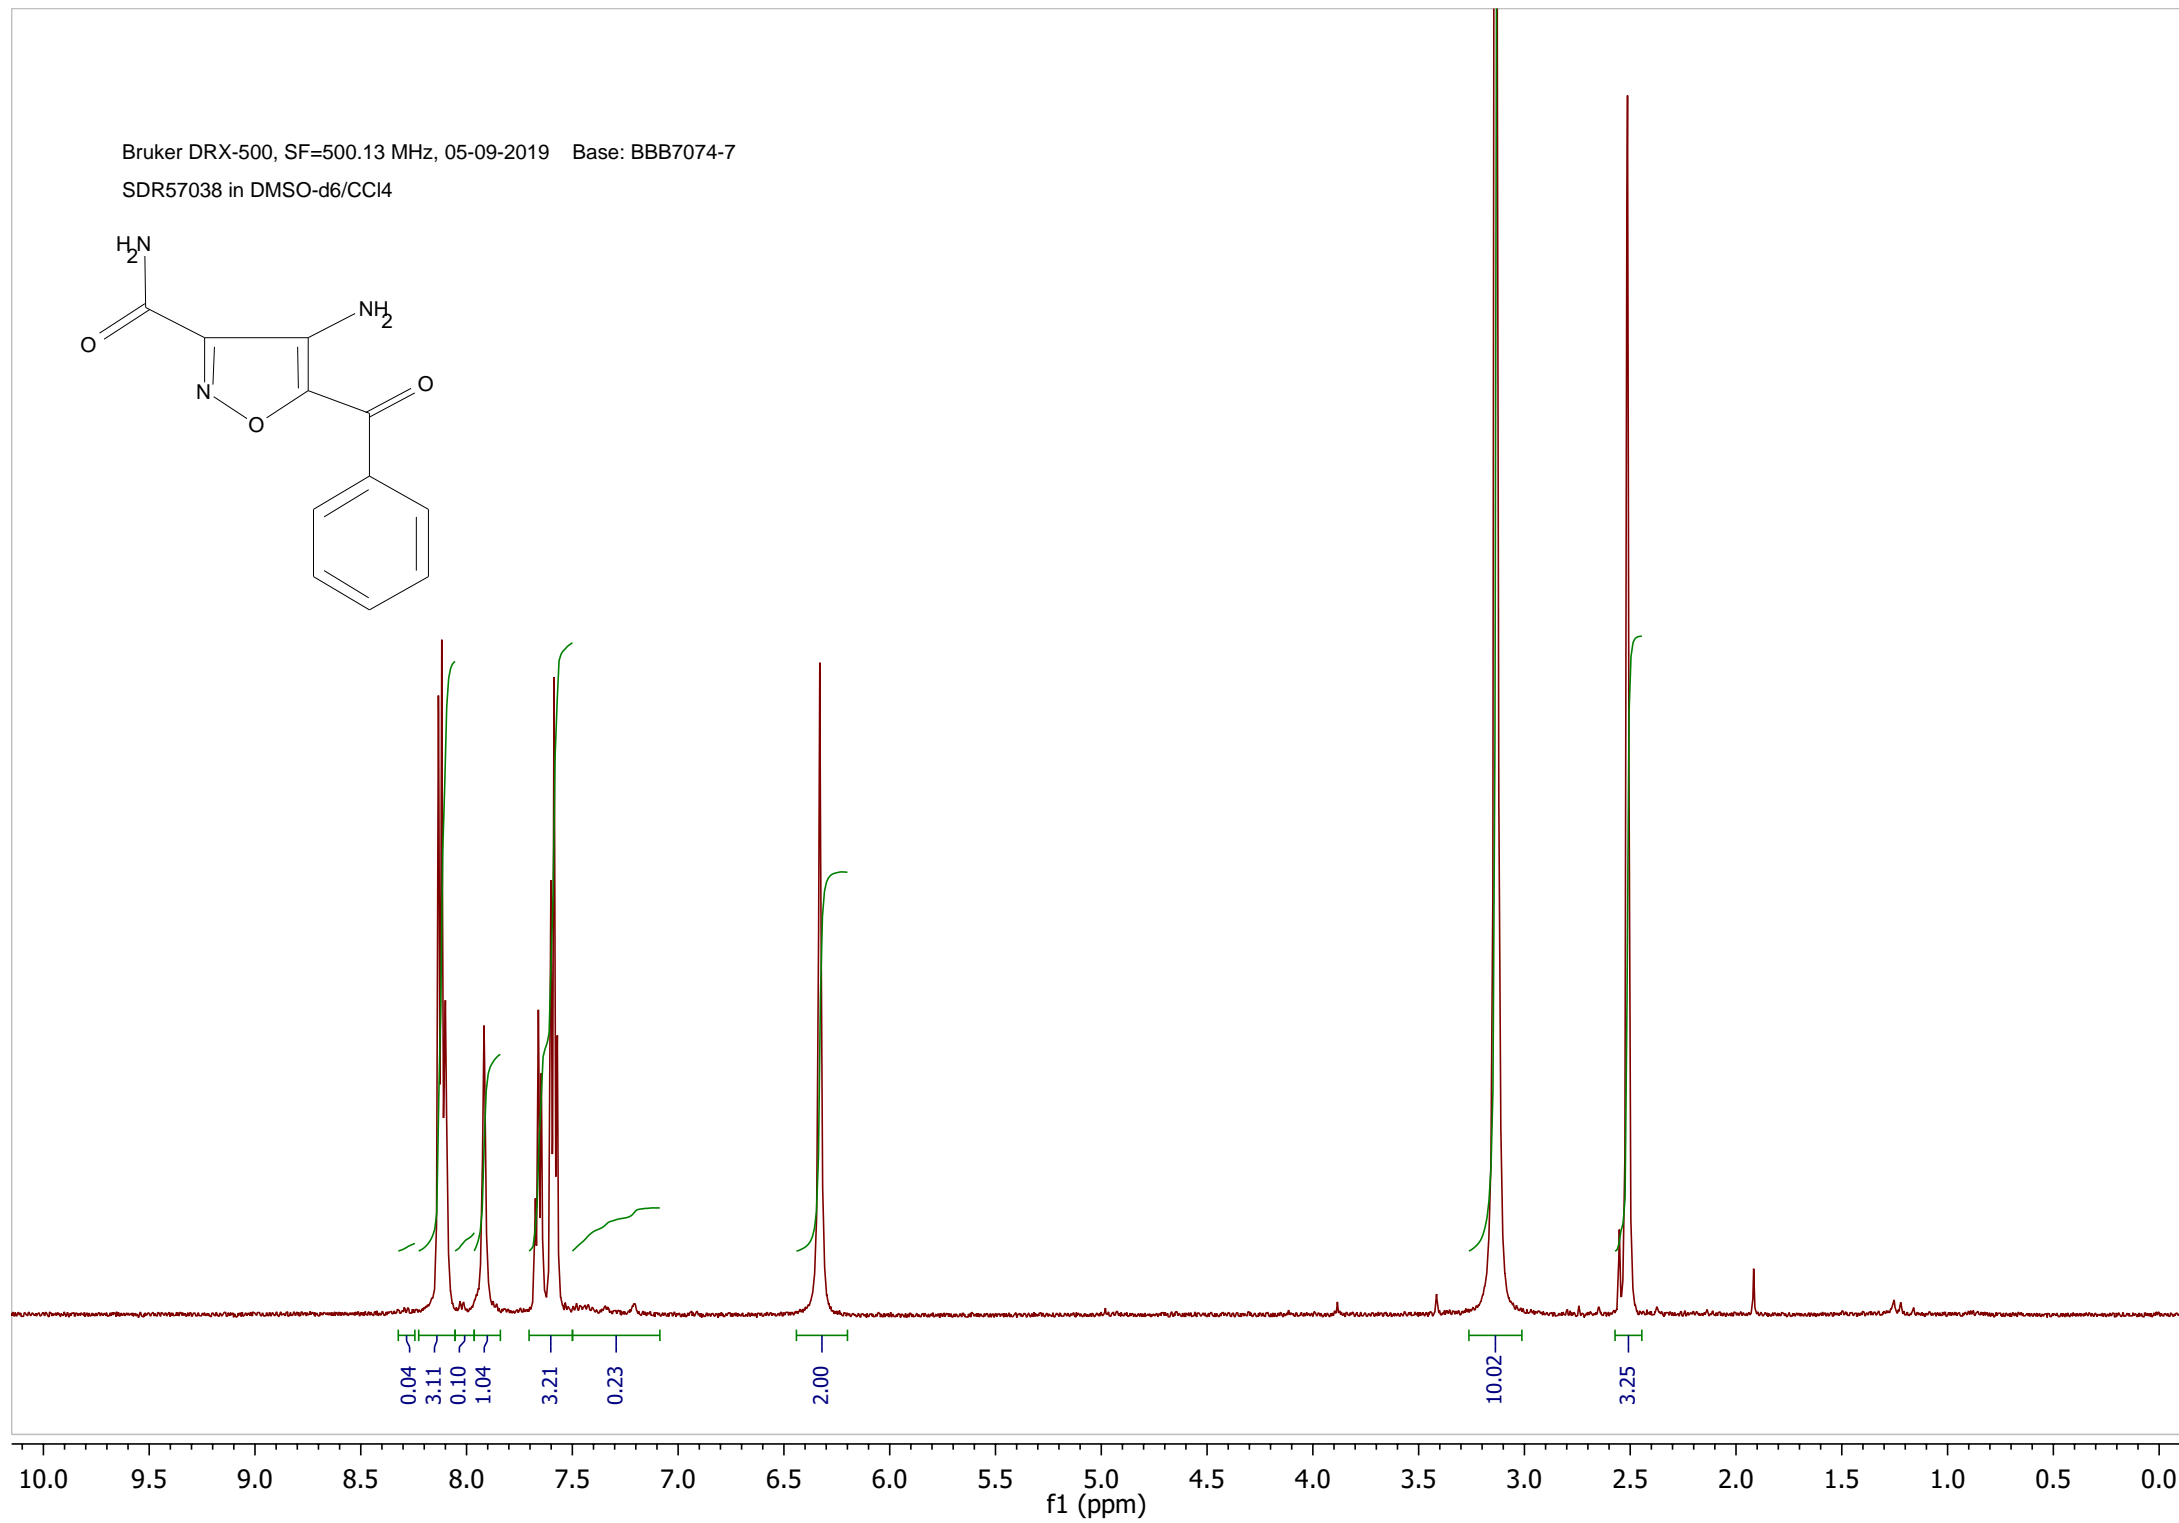

Supplement: supp2 [file elife-53779-supp2-v2.zip]

Bruker DRX-500, SF=500.13 MHz, 05-09-2019 Base: BBB7074-7

SDR49199 in DMSO-d6/CCl4

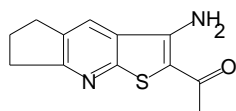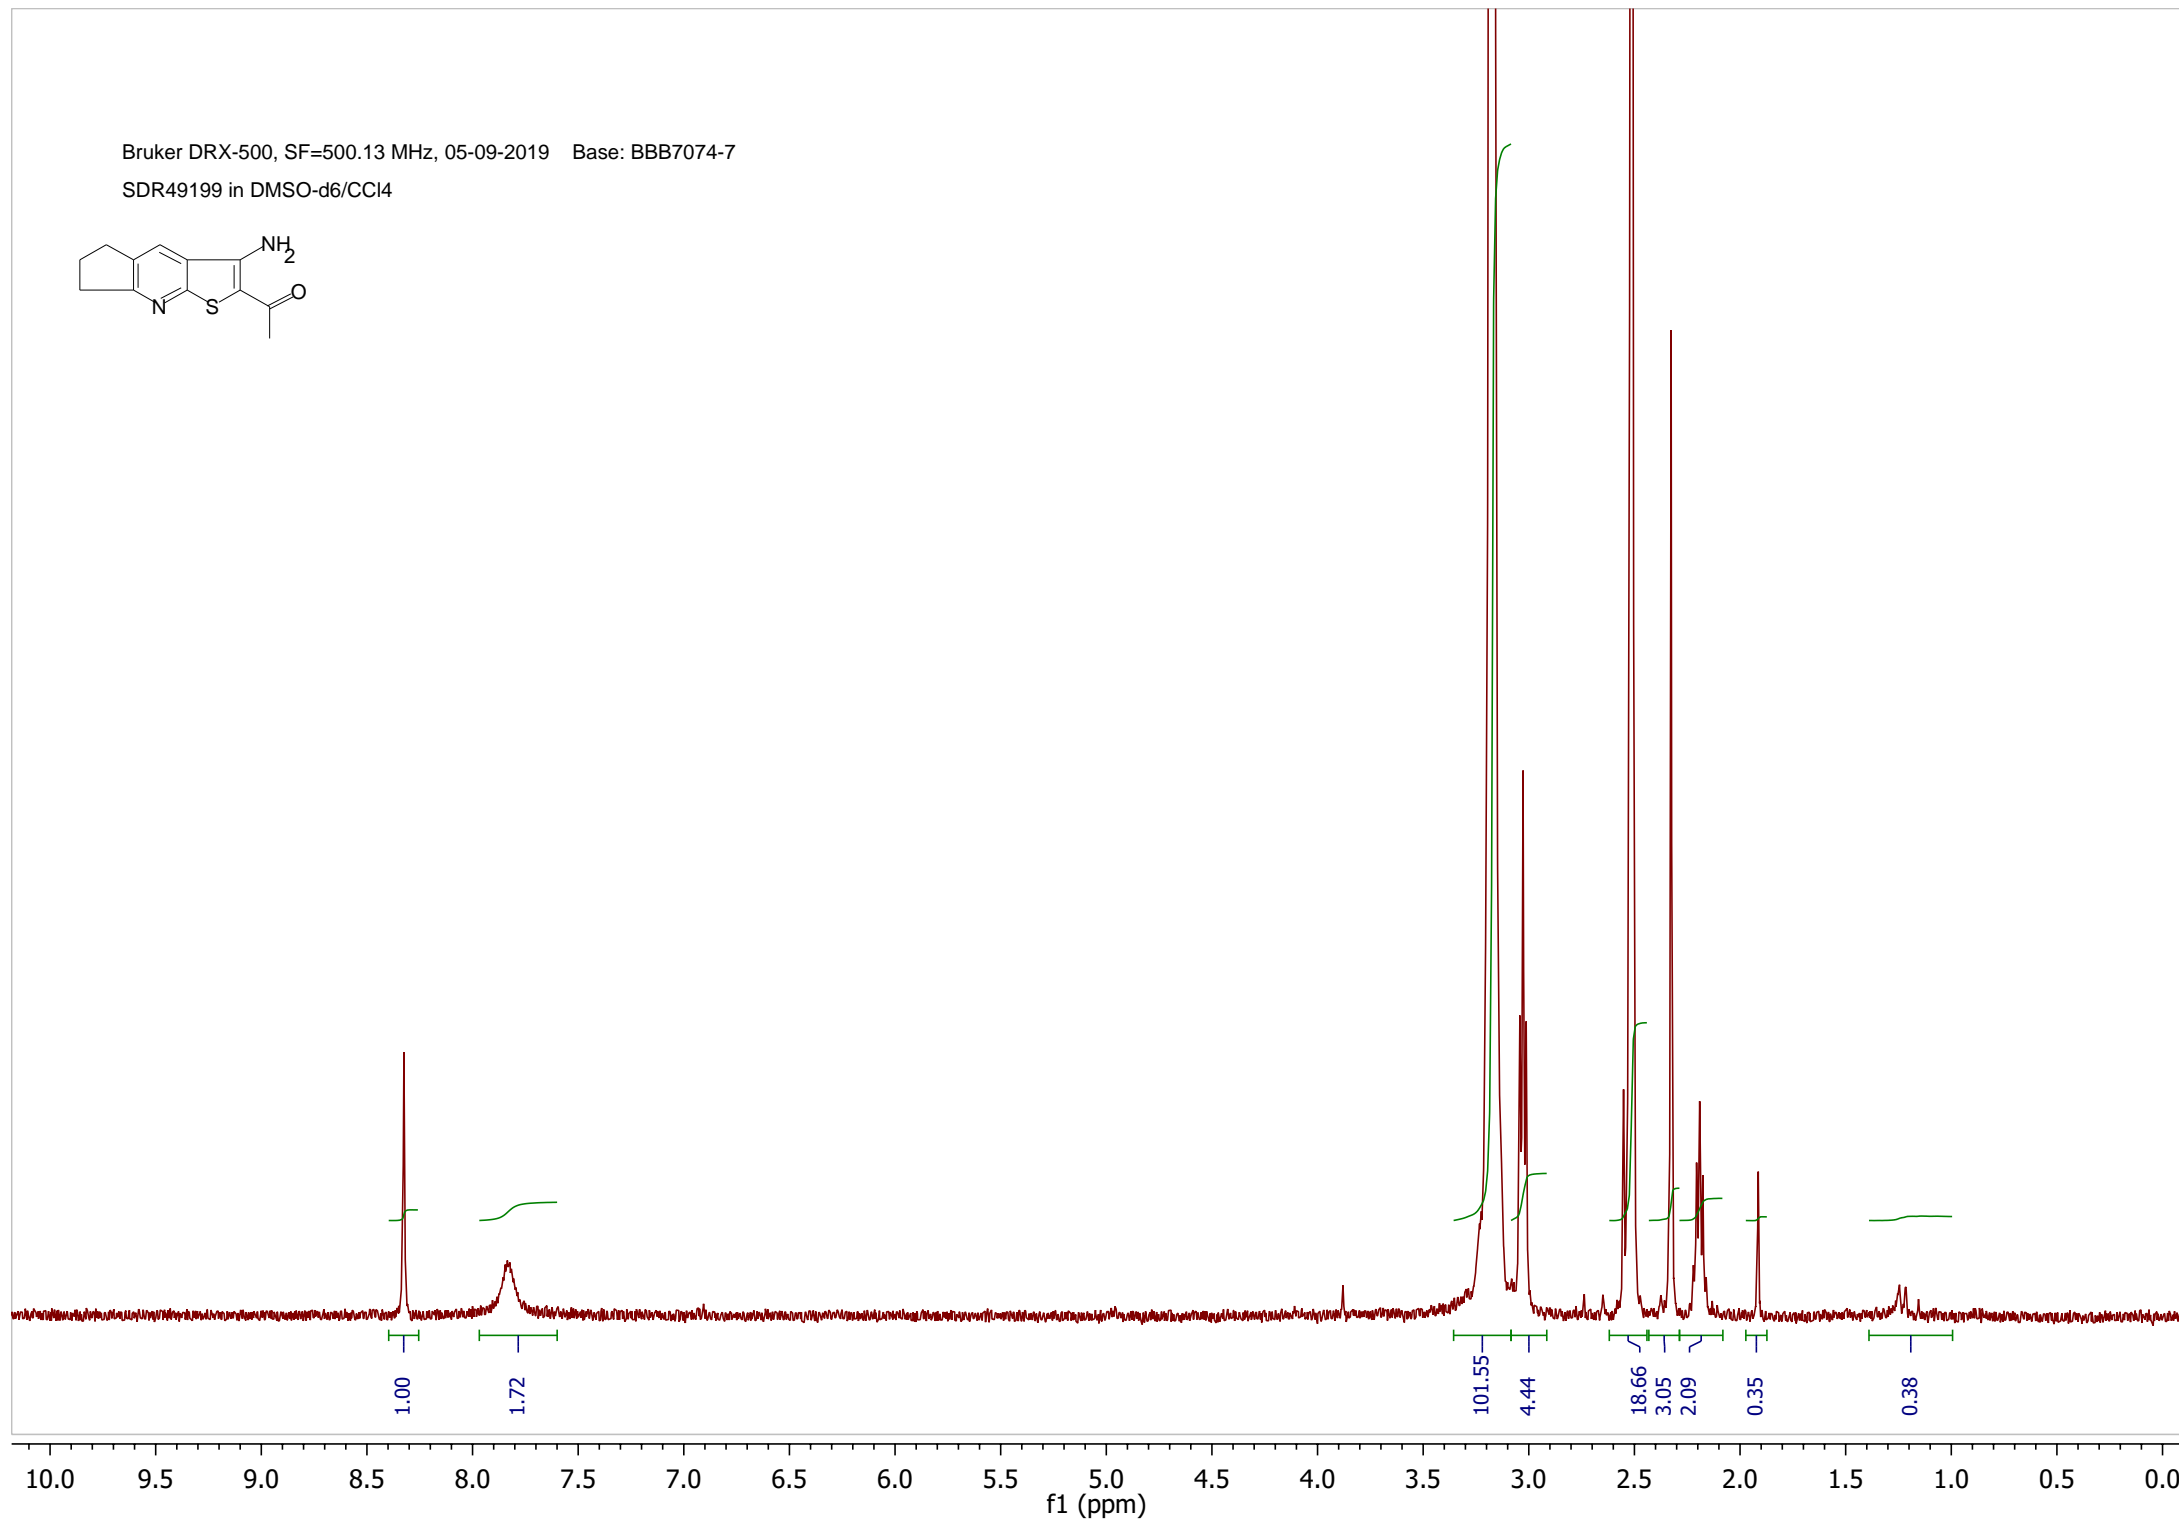

Supplement: supp2 [file elife-53779-supp2-v2.zip]

MaxPeak: 98.43%  
Ret\_Time: 1.150 min

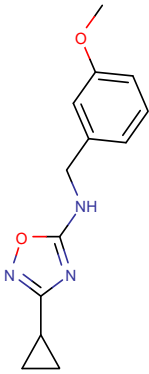

Mol Wt 245.28  
Exact Mass 245.13

| # | Time  | Area% |
|---|-------|-------|
| 1 | 0.591 | 1.57  |
| 2 | 1.150 | 98.43 |

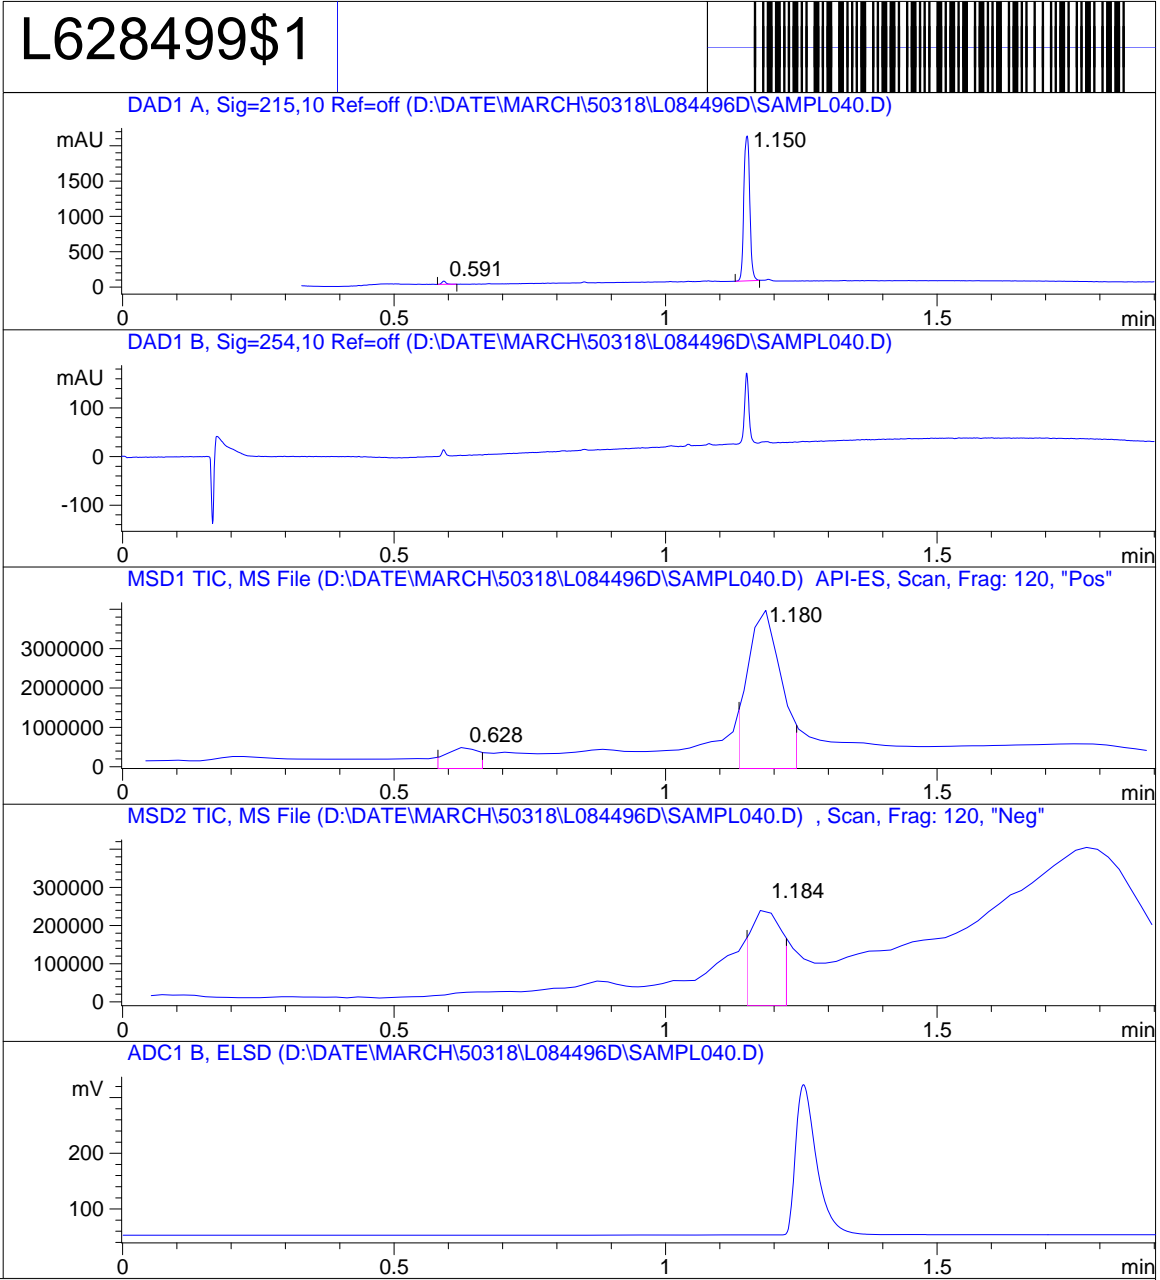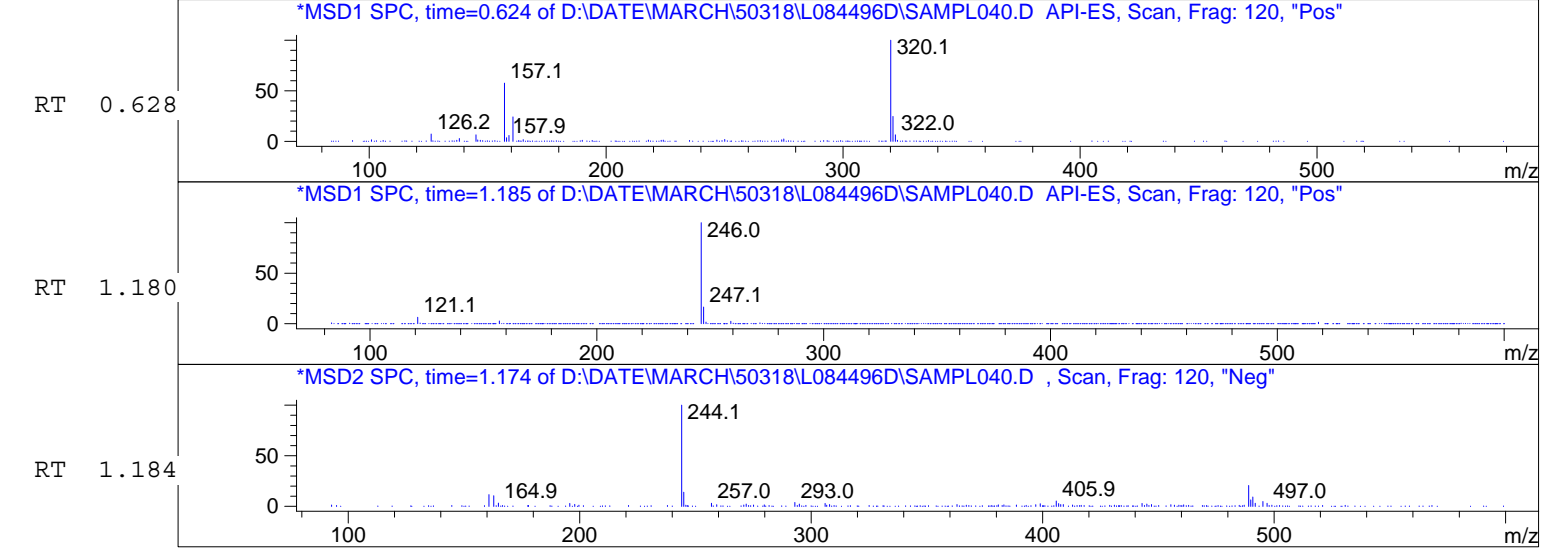

Supplement: supp2 [file elife-53779-supp2-v2.zip]

MaxPeak: 95.11%  
Ret\_Time: 0.577 min

L693643\$8



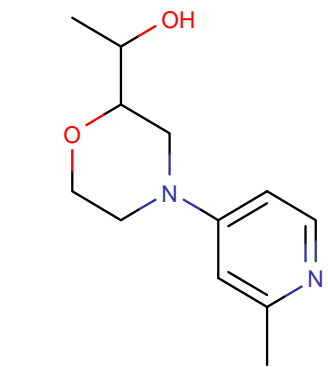

Mol Wt 222.28  
Exact Mass 222.16

| # | Time  | Area% |
|---|-------|-------|
| 1 | 0.577 | 95.11 |
| 2 | 0.643 | 4.89  |

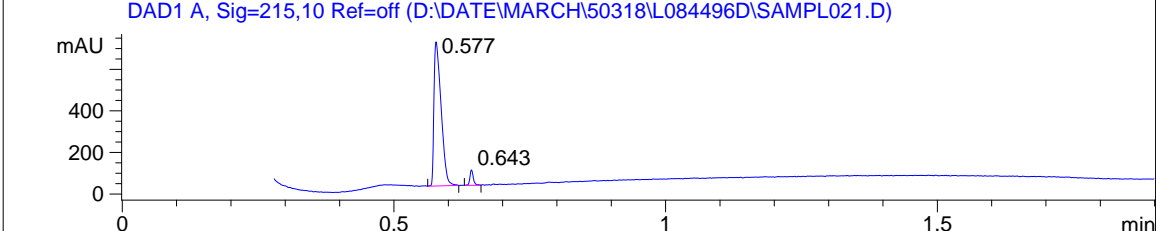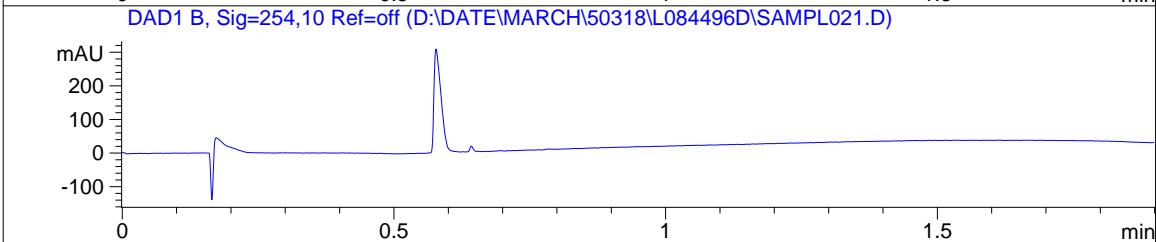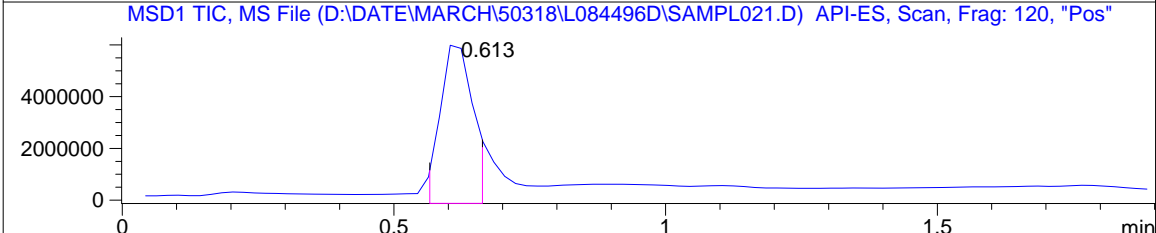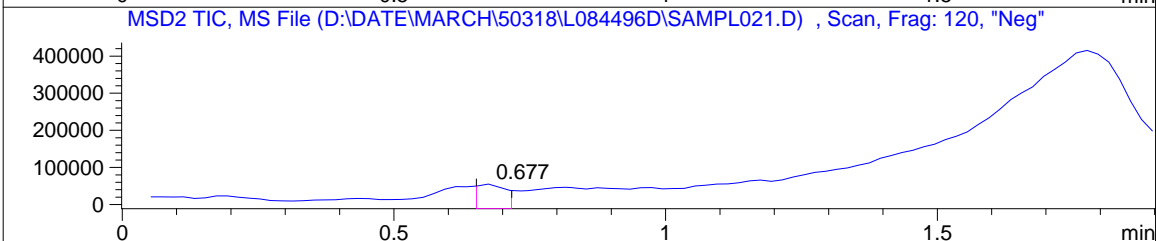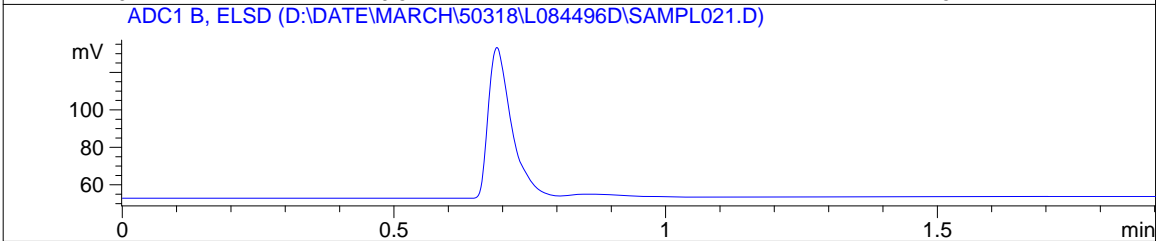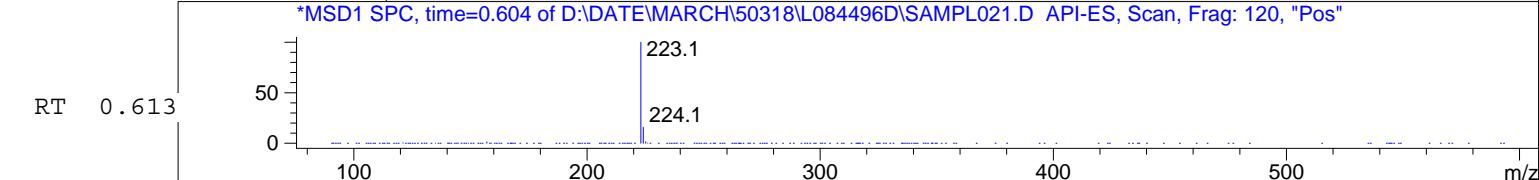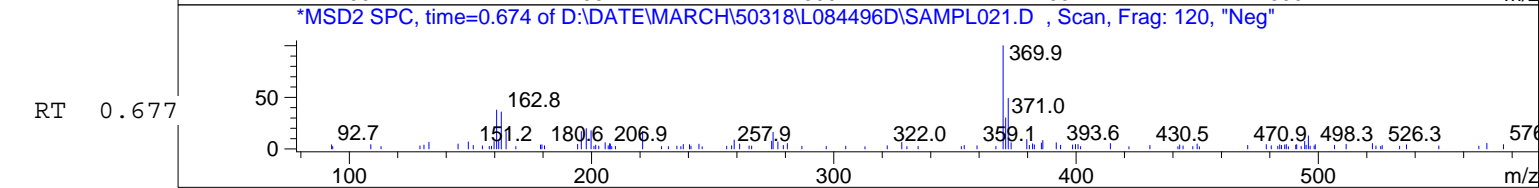

Supplement: supp2 [file elife-53779-supp2-v2.zip]

Bruker DRX-500, SF=500.13 MHz, 05-09-2019 Base: BBB7074-7

IVY71515 in DMSO-d6/CCl4

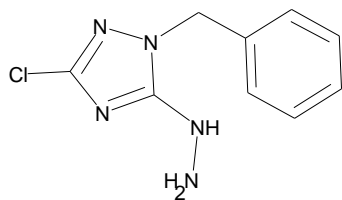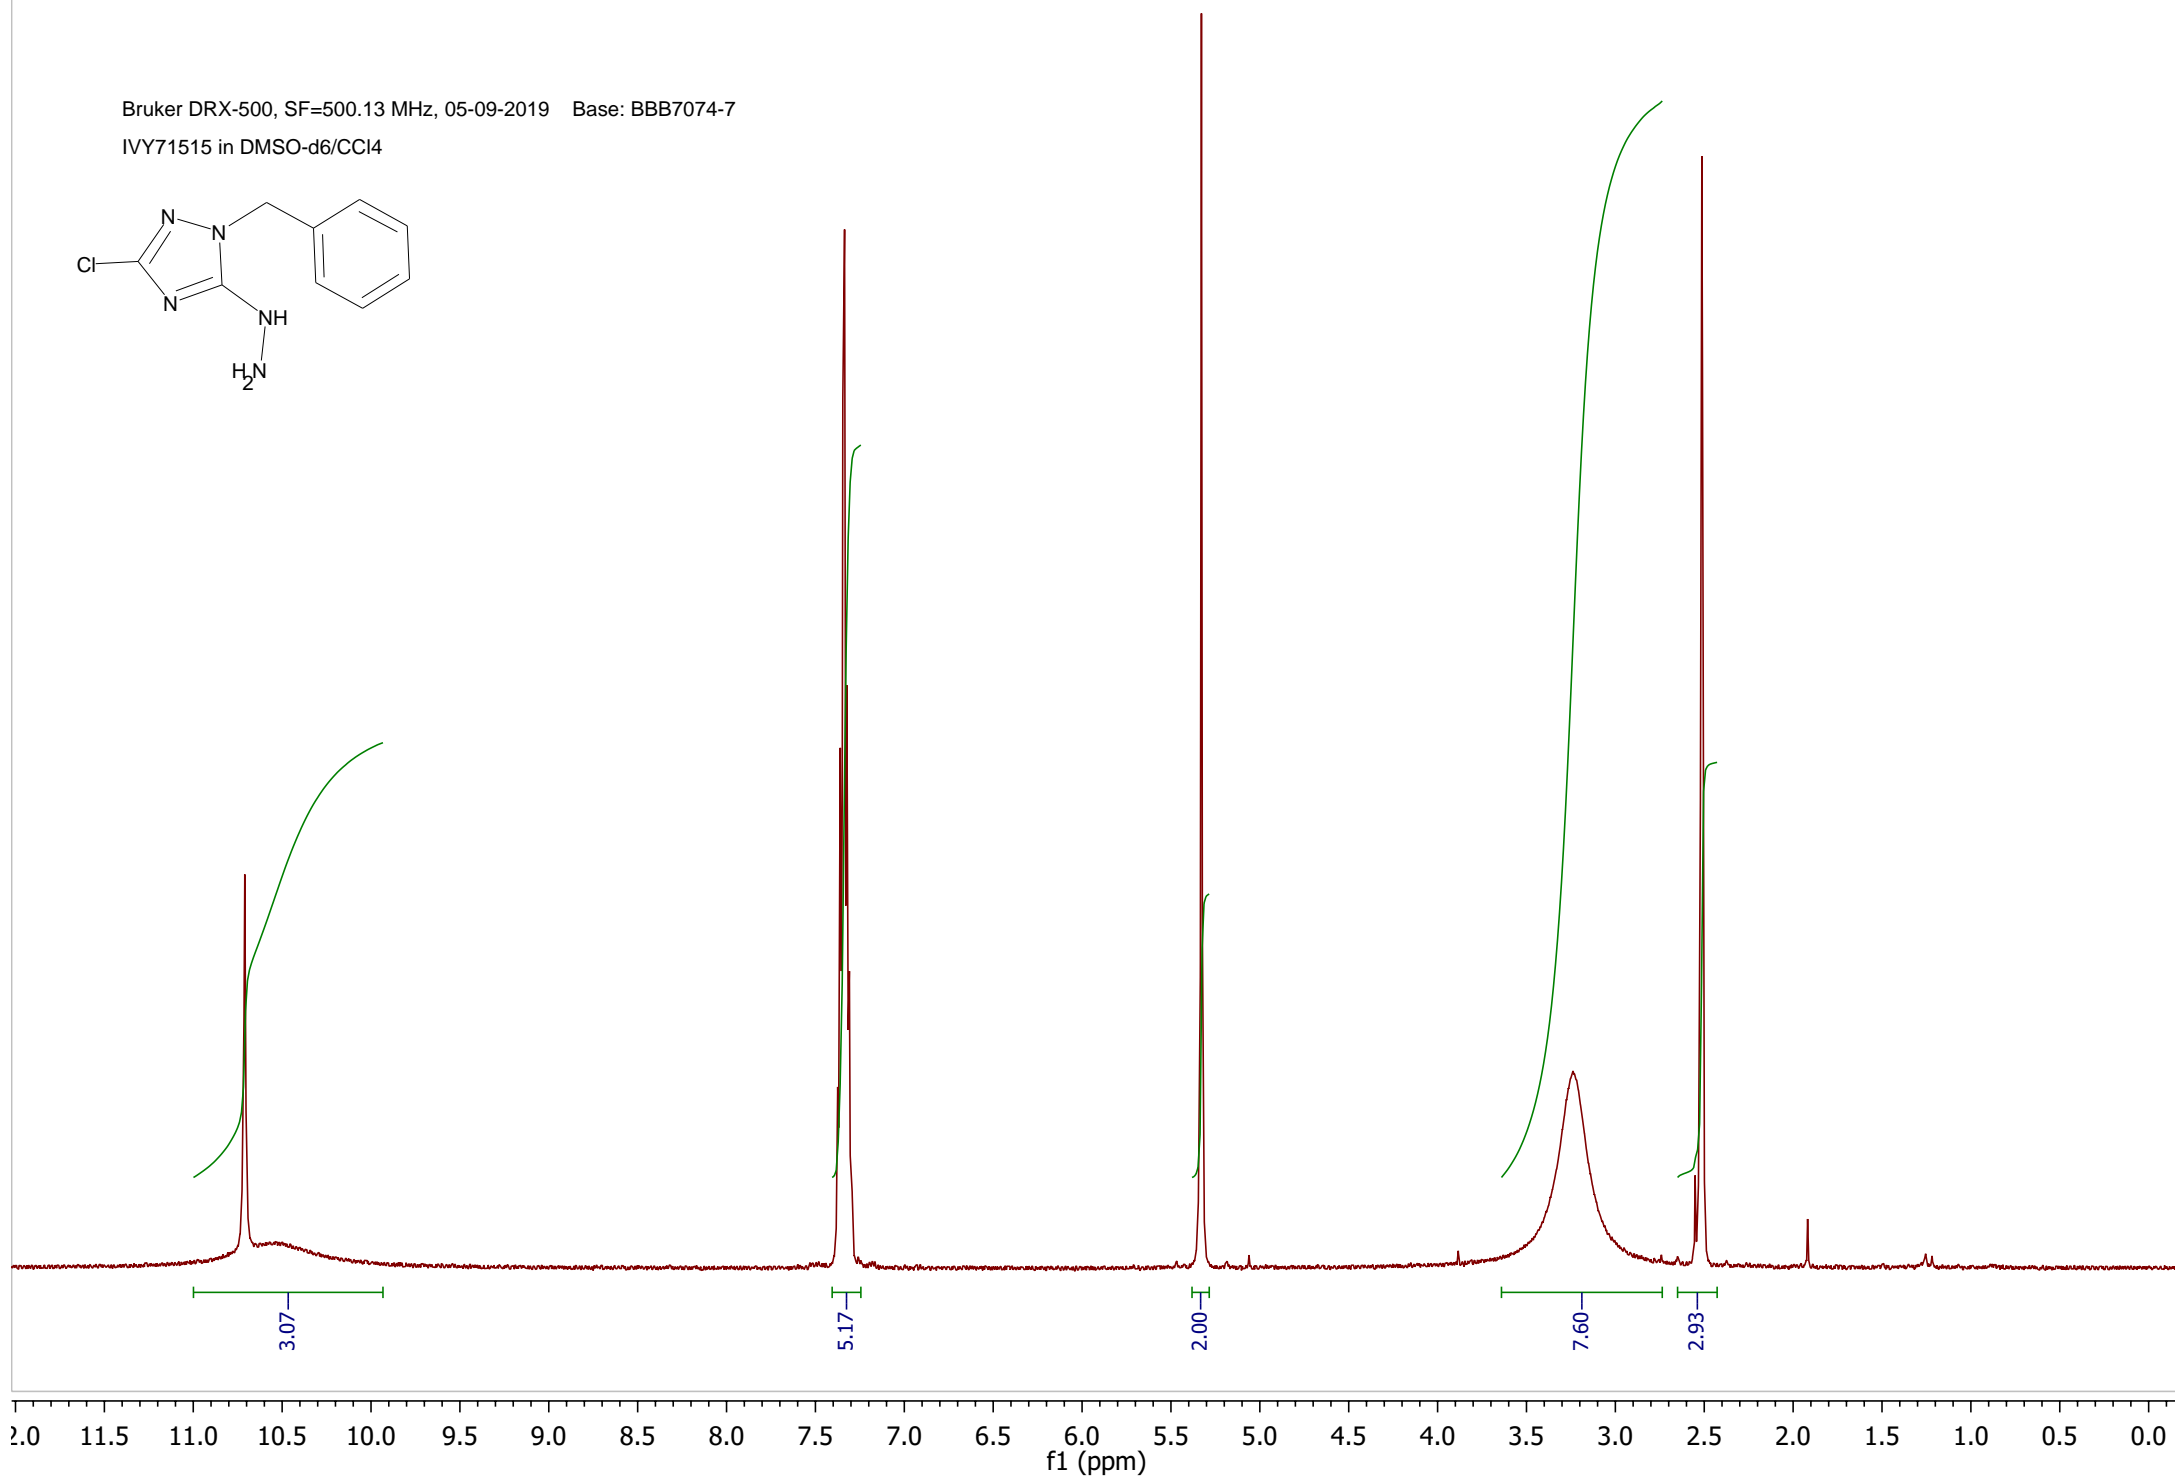

Supplement: supp2 [file elife-53779-supp2-v2.zip]

MaxPeak: 100.00%  
Ret\_Time: 0.883 min

L693638\$6

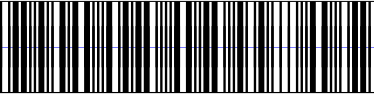

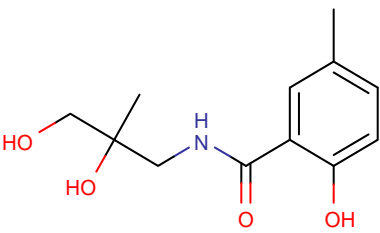

Mol Wt 239.27  
Exact Mass 239.13

| # | Time  | Area%  |
|---|-------|--------|
| 1 | 0.883 | 100.00 |

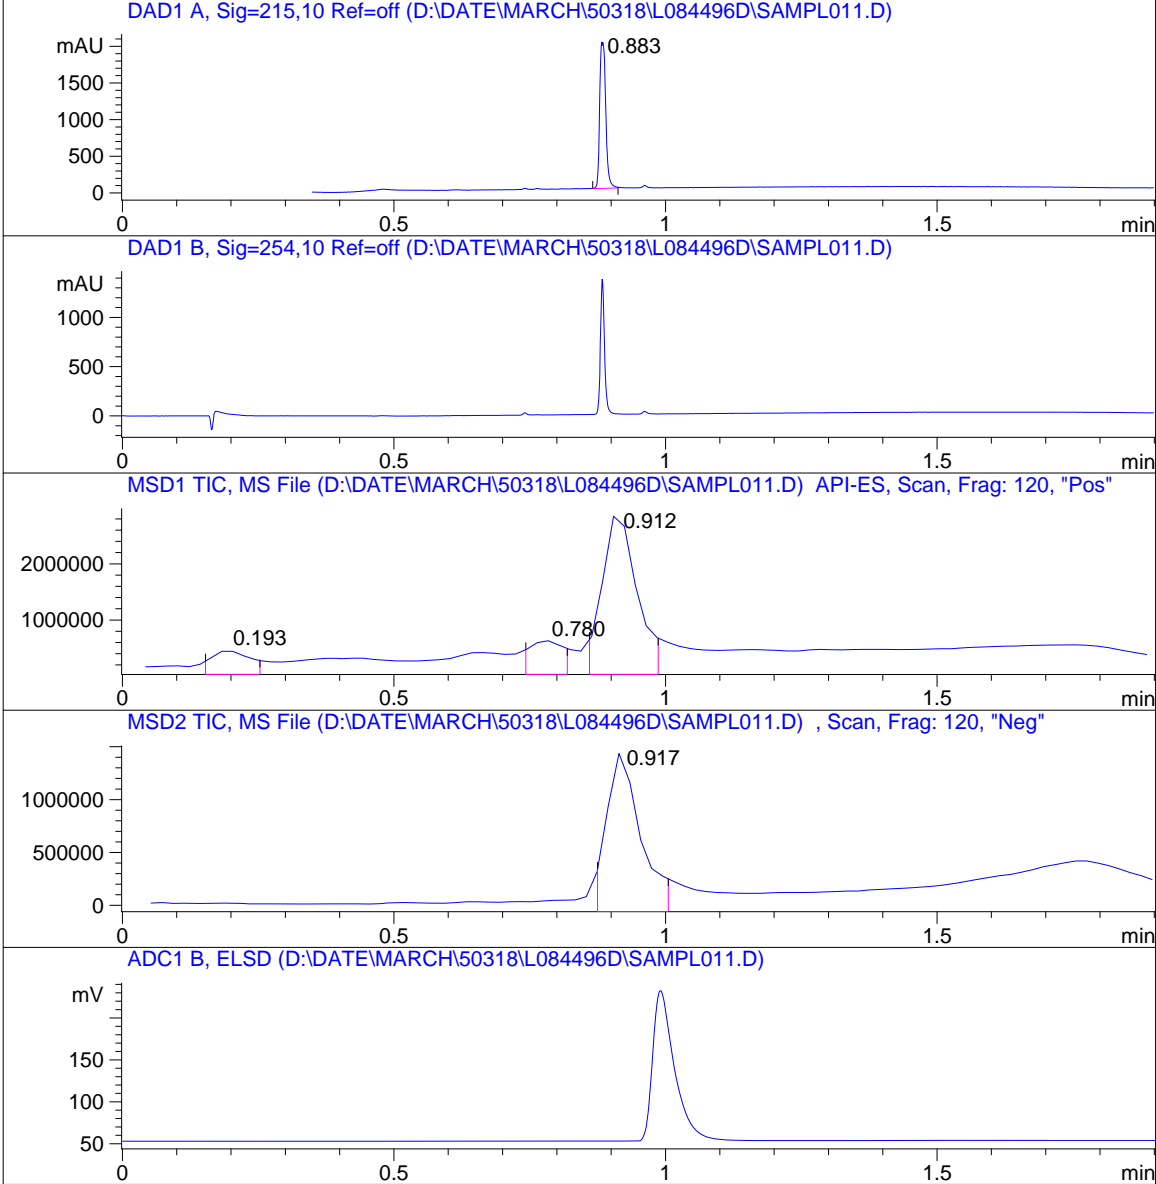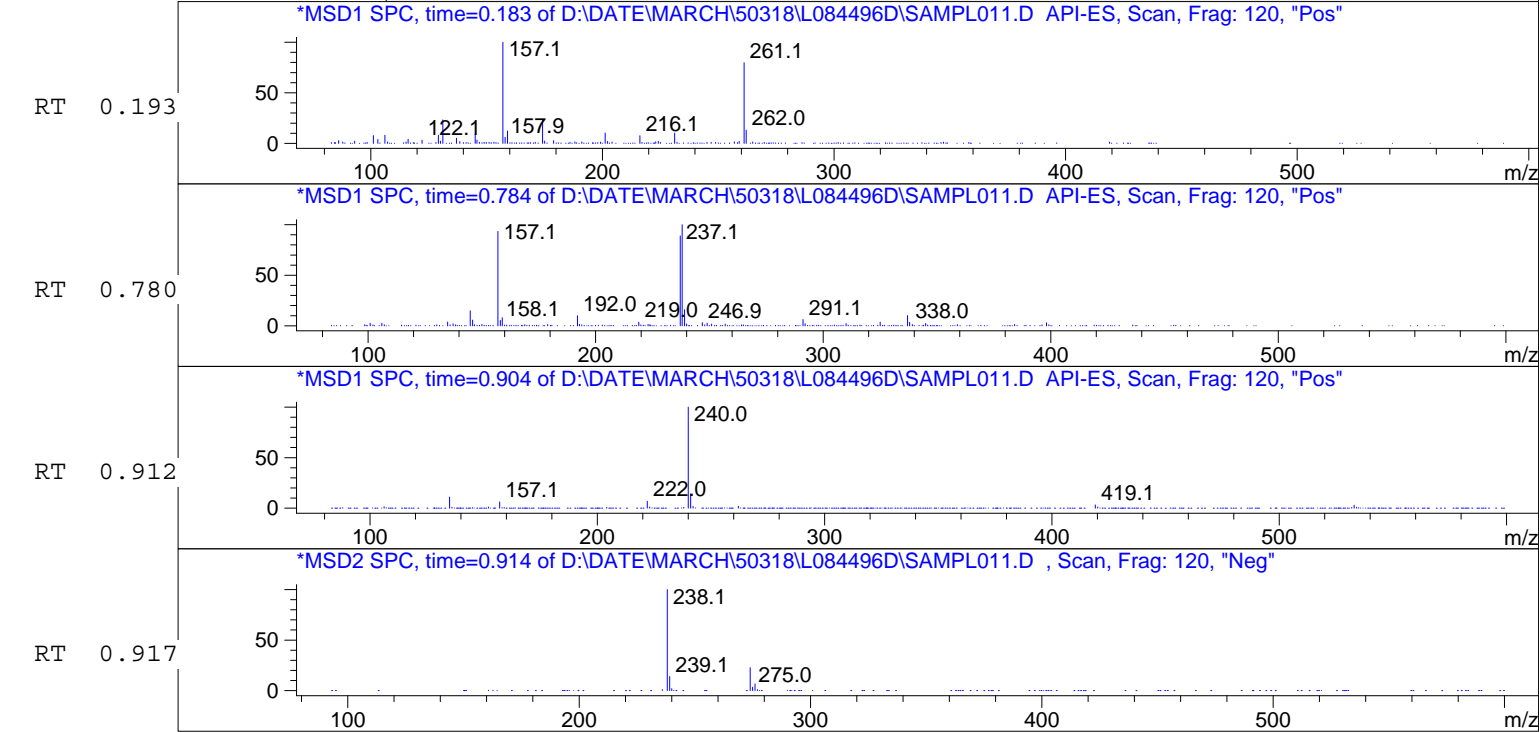

Supplement: supp2 [file elife-53779-supp2-v2.zip]

L693617\$2

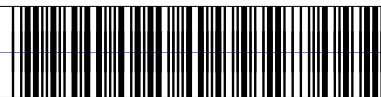

MaxPeak: 61.29%  
Ret\_Time: 0.759 min

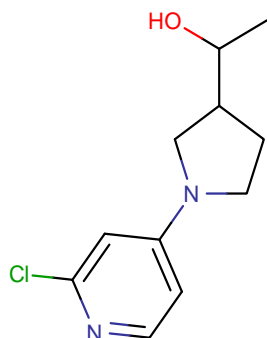

Mol Wt 226.7  
Exact Mass 226.11

| # | Time  | Area% |
|---|-------|-------|
| 1 | 0.740 | 38.71 |
| 2 | 0.759 | 61.29 |

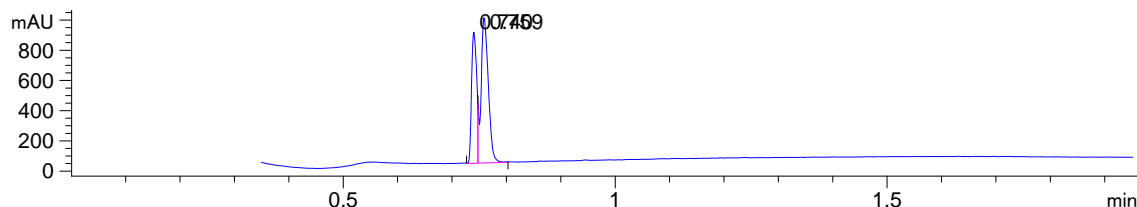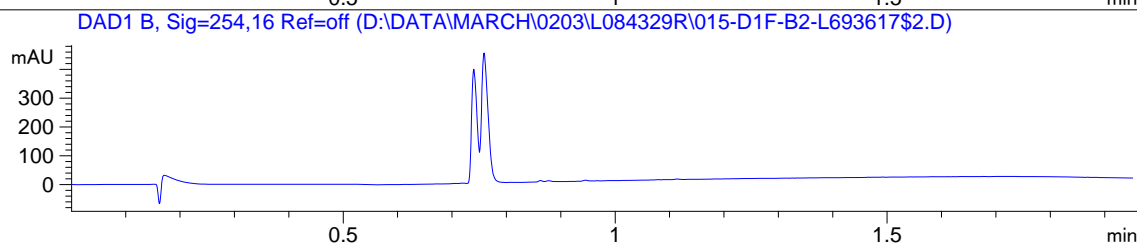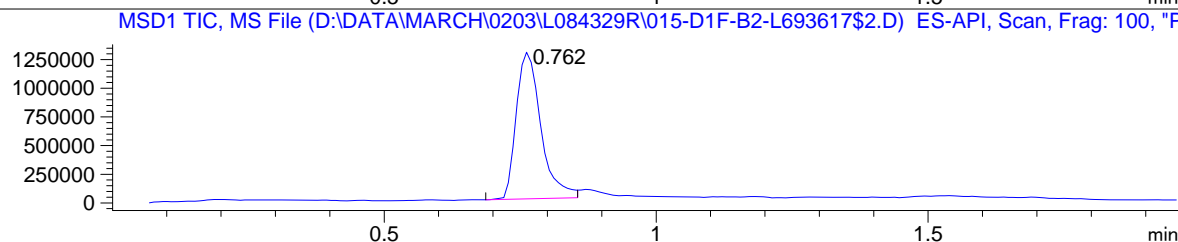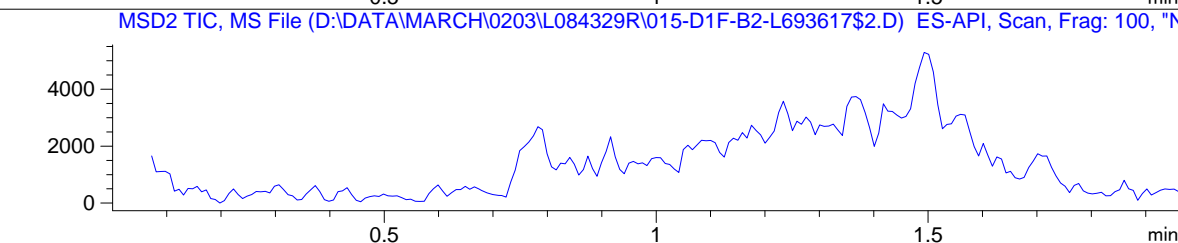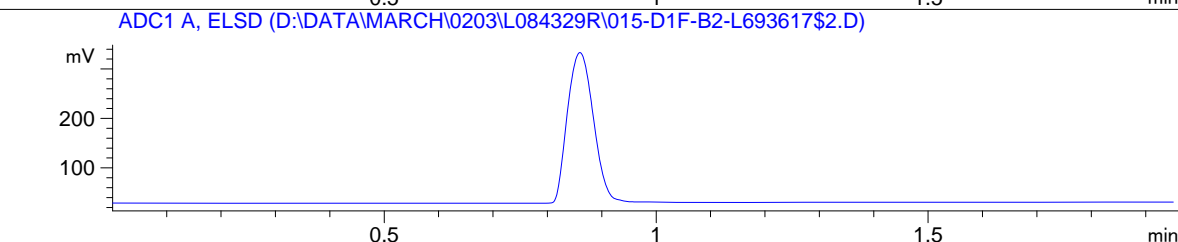

RT 0.762

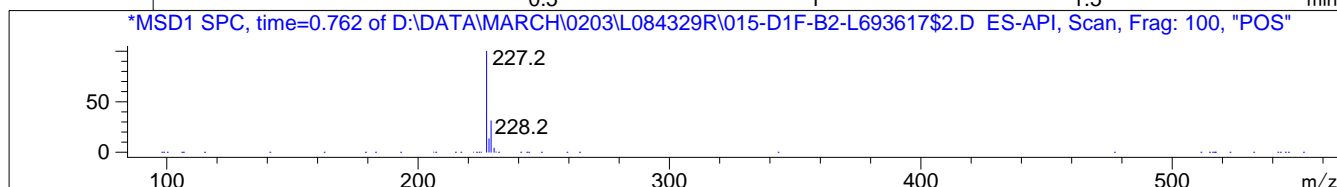

Supplement: supp2 [file elife-53779-supp2-v2.zip]

# L693613\$3

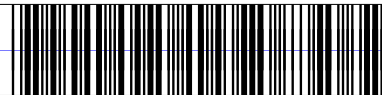

MaxPeak: 100.00%  
Ret\_Time: 0.818 min

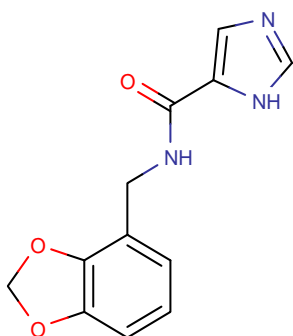

Mol Wt **245.23**  
Exact Mass **245.08**

| # | Time  | Area%  |
|---|-------|--------|
| 1 | 0.818 | 100.00 |

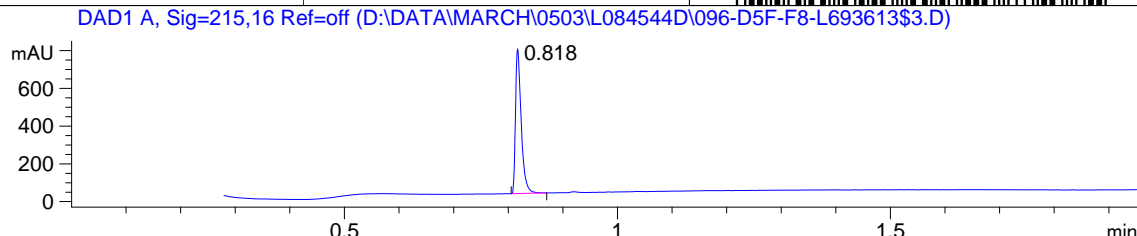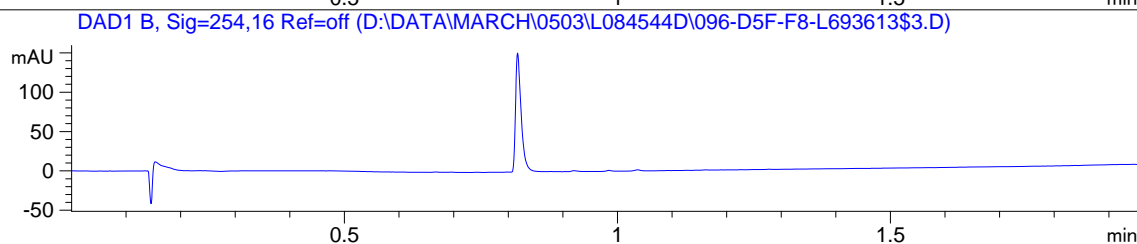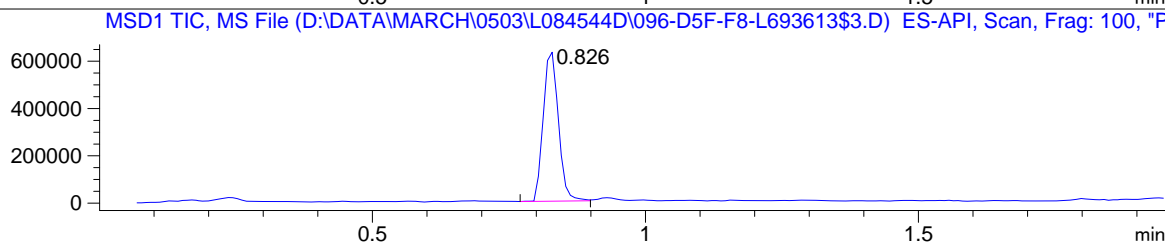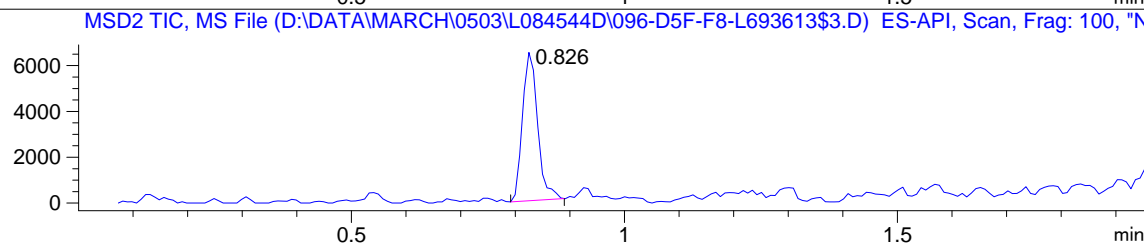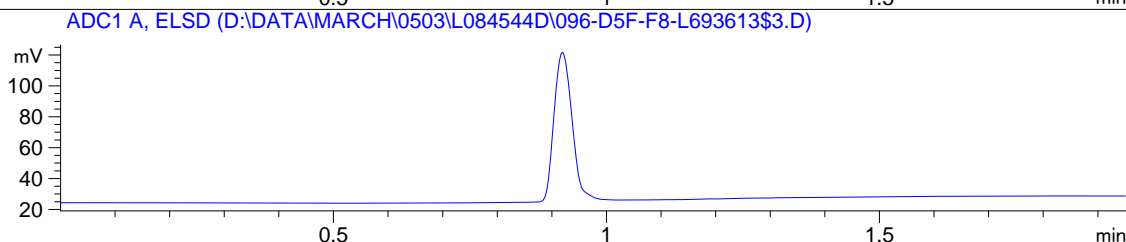

RT 0.826

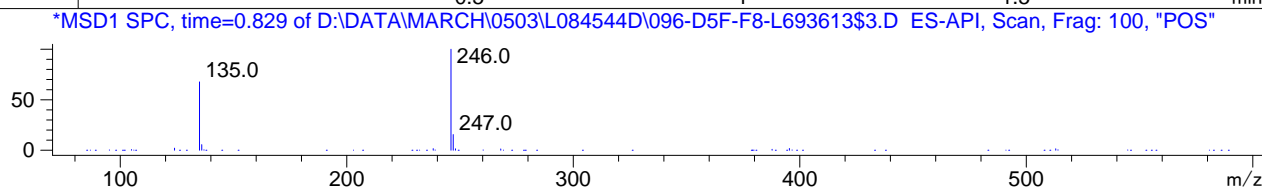

RT 0.826

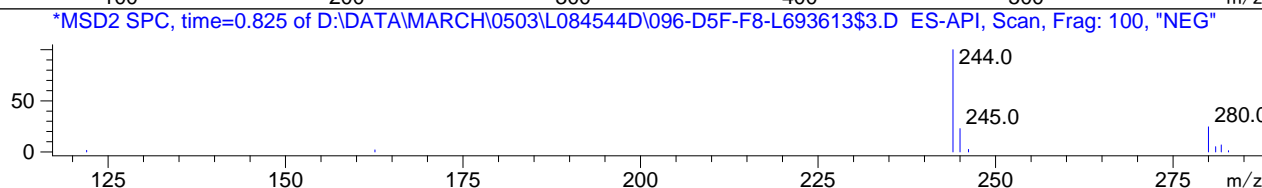

Supplement: supp2 [file elife-53779-supp2-v2.zip]

MaxPeak: 94.43%  
Ret\_Time: 1.059 min

L693621\$2

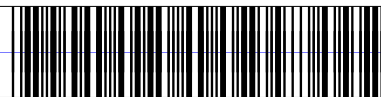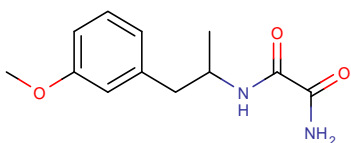

Mol Wt 236.27  
Exact Mass 236.13

| # | Time  | Area% |
|---|-------|-------|
| 1 | 1.059 | 94.43 |
| 2 | 1.102 | 5.57  |

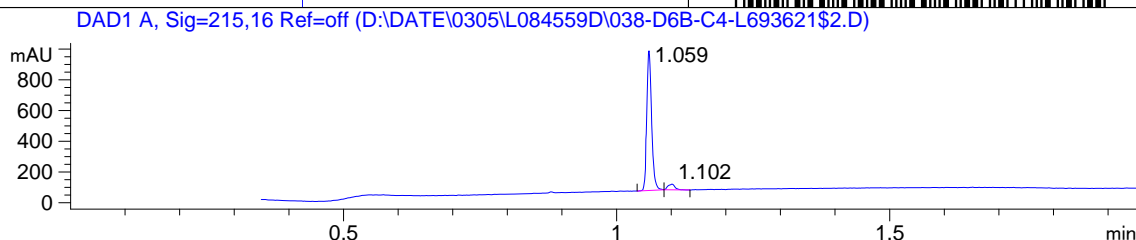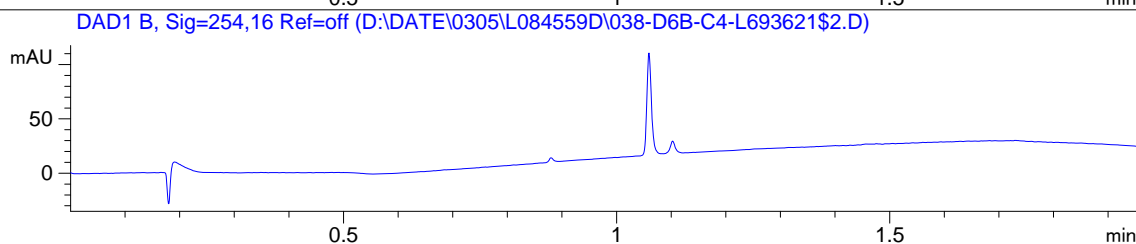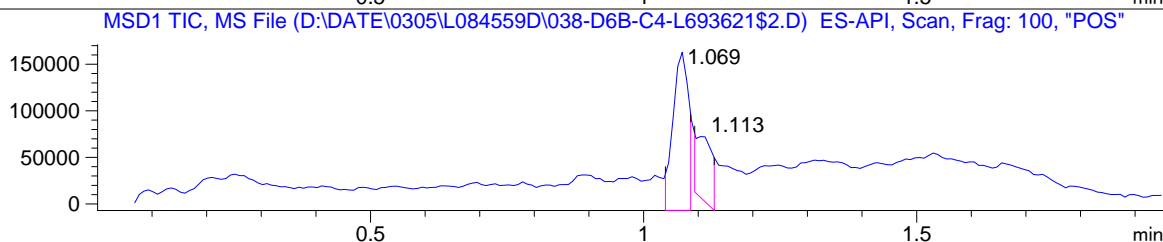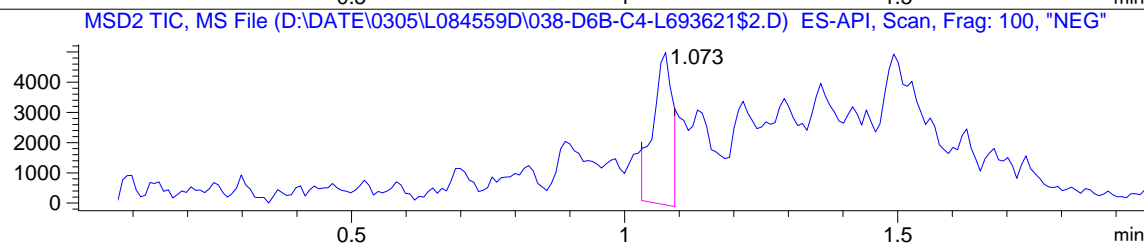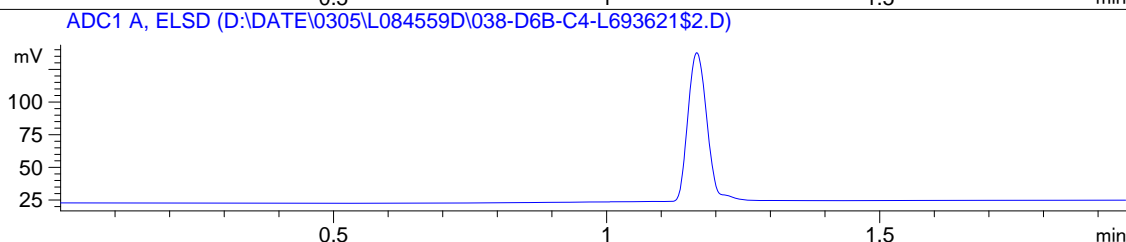

RT 1.069

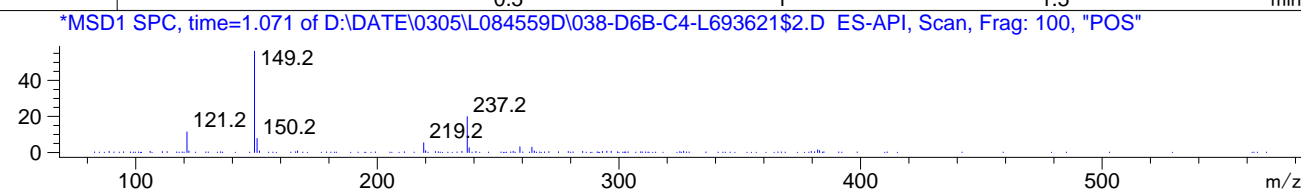

RT 1.113

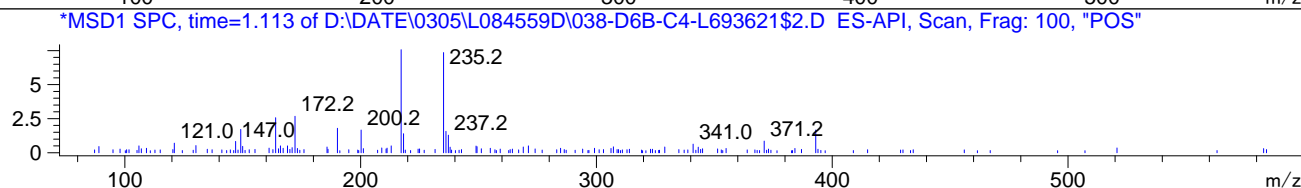

RT 1.073

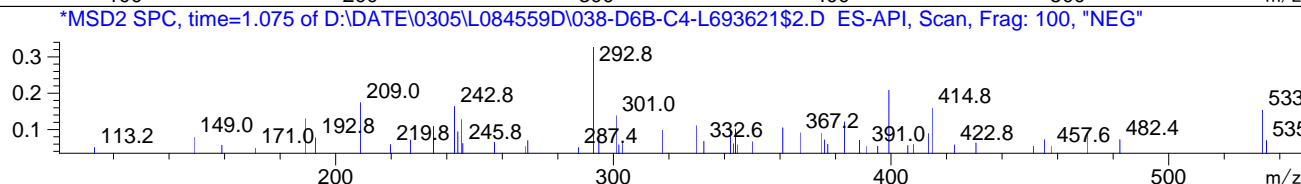

Supplement: supp2 [file elife-53779-supp2-v2.zip]
